# Supplementary material for: Is the content and potential preservation of soil organic carbon reflected by cation exchange capacity? A case study in Swiss forest soils
Source: Copernicus journal article supplement (doi:10.5194/bg-2019-33), 2019-02-18
Supplement: Supplementary file 1 [file bg-2019-33-supplement.zip]

Archive with 2 entries (2 files):
- Supplement_Solly_etal/Solly_etal_DataTable.csv
- Supplement_Solly_etal/Supplement_Solly_etal.pdf
