# Supplementary material for: Is the content and potential preservation of soil organic carbon reflected by cation exchange capacity? A case study in Swiss forest soils
Source: Copernicus journal article supplement (doi:10.5194/bg-2019-33), 2019-02-18
Supplement: Supplementary file 1 [file bg-2019-33-supplement.zip › Supplement_Solly_etal/Solly_etal_DataTable.csv]

PROFILNR	CLNR.x	f.earth*10 0-30 ms (kg/m2)	Corg 0-30 ms (g/kg)	clay 0-30 ms (%)	pH 0-30 ms (-)	Al 0-30 ms (mmolc/kg)	CEC 0-30 ms (mmolc/kg)	f.earth*10 30-120 ms (kg/m2)	Corg 30-120 ms (g/kg)	clay 30-120 ms (%)	pH 30-120 ms (-)	Al 30-120 ms (mmolc/kg)	CEC 30-120 ms (mmolc/kg)	f.earth*10 0-120 ms (kg/m2)	Corg 0-120 ms (g/kg)	clay 0-120 ms (%)	pH 0-120 ms (-)	Al 0-120 ms (mmolc/kg)	CEC 0-120 ms (mmolc/kg)	X	Y	Altitude (m a.s.l.)	EXPOSIT	MAT (�C)	MAP (mm)	WRB2007_RSG	LAI
1	378635	2532.8	24.36938867	21.97813487	4.764478767	2.446307446	116.7659327	9853.127273	4.751826106	20.53283366	5.339177462	0.595984596	132.5258094	12385.92727	8.763424218	20.8283835	5.145072001	0.974357375	129.3030701	567960	161360	897	SSE	7.4	1481.1	Luvisol	5.97
2	378636	1545.171429	53.85900769	37.04350974	4.059039203	42.11052716	128.6797466	4147.408571	15.6683399	31.07913675	4.15373729	39.42881638	70.87034254	5692.58	26.03466391	32.69808259	4.125924956	40.15672936	86.56189881	585040	144340	1460	NW	4.9	1633	Cambisol	4.14
3	378637	2629.75	11.27883734	10.98876794	4.123532368	17.39974986	43.15254019	9762.116667	3.427662631	11.57309028	4.204657324	16.1352354	49.93801812	12391.86667	5.093806018	11.44908784	4.186129306	16.40358536	48.49803244	612080	209700	569	S	8.8	1200.3	Cambisol	5.07
4	378638	2991.84	27.24836716	20.45971001	4.898721421	0.81055502	89.71762406	10380.32	8.233890285	22.56598835	5.609523609	0	107.7293735	13372.16	12.4881224	22.09473705	5.324902738	0.181350726	103.6994881	584450	215650	527	NW	9.3	1101.6	Luvisol	4.41
5	378639	2776.2	19.09985217	18.48331172	3.463614177	82.44300463	105.5672097	7010.733333	5.785392605	39.52323937	5.171491306	3.631241796	271.4958842	9786.933333	9.562224569	33.55497074	3.989835613	25.9872964	224.4279038	596130	179350	1015	N	6.7	1471.4	Gleysol	4.57
6	378640	2928.825	28.95697884	24.20387698	4.942694733	1.146173439	180.6704279	10443.4	3.056145117	11.92326086	5.780634818	0.044156741	133.8245247	13372.225	8.729023738	14.6129984	5.420974621	0.285523758	144.0848555	595040	178520	1151	NE	6.2	1530.6	Gleysol	2.99
7	108087	2243.590909	41.47726893	26.13323892	7.427831101	0	260.2731252	7068.871591	6.702315892	19.38321737	7.735864688	0	177.98525	9312.4625	15.08041873	21.00945608	7.639386781	0	197.8103316	553000	161000	650	W	8.7	1286.2	Phaeozem	4.88
8	378641	2638.048649	16.85918334	10.7890476	3.840927257	32.04389808	41.43339147	9935.651351	2.074048136	12.53854611	4.0901013	18.80762939	36.57594049	12573.7	5.176071085	12.1714893	4.024678648	21.5846895	37.59506708	617260	219660	556	S	8.9	1198.3	Cambisol	5.44
9	378642	3223.7	19.05512889	19.28459224	4.176892512	17.24586608	81.5875637	8671.842857	3.69589074	11.83281581	4.351279291	9.303671766	50.59705573	11895.54286	7.85825446	13.85225216	4.296701449	11.45601169	58.99550393	610920	219860	480		9.2	1125.1	Cambisol	5.34
10	378643	2771.4	19.74710543	19.10976763	4.199200733	15.58045993	69.36520282	12482.82727	1.409340978	13.33083589	5.028030825	0.579239142	83.92088588	15254.22727	4.740960437	14.38075675	4.717692806	3.304672724	81.27639794	629250	230550	482	NW	8.9	1174.5	Gleysol	3.21
11	378644	2648.2	40.8276486	28.00593233	3.674121115	27.86497489	136.9785056	7111.233333	2.633216985	39.14739895	5.71888156	0.217768897	255.4955295	9759.433333	12.99718899	36.12418737	4.230200275	7.719775254	223.3362051	564660	157160	1226	E	5.7	1686.7	Gleysol	4.11
12	378645	2478.028571	19.57260818	5.167539288	3.817668561	28.1360429	42.55043246	9558.046429	2.448364934	5.595209926	4.201176426	18.68073301	50.95892114	12036.075	5.973963107	5.507159622	4.089913294	20.62742477	49.22775253	612000	209860	613	W	8.8	1200.2	Cambisol	4.99
13	378646	1421.214286	81.12845822	42.2329703	5.908306641	0	355.5625893	4306.725714	25.64171044	28.62368594	7.216750287	0	213.8941779	5727.94	39.40906111	32.00041638	6.453343954	0	249.0448901	585620	144550	1605	SSE	4.3	1494.1	Phaeozem	3.58
14	378647	2022.9	50.1518139	28.19839834	5.421360474	0.112034376	236.4941484	5533.577778	6.379456517	33.18250358	6.247334777	0.006111158	217.4651035	7556.477778	18.09749558	31.84823823	5.844987697	0.034467237	222.5592567	596200	179440	1000	N	7	1435.6	Gleysol	3.36
15	378648	1893.5	43.16632758	39.81031423	5.466105434	0.274569501	220.3910048	3257.62	19.72067099	37.20967885	6.294607949	0	215.1279094	5151.12	28.33905898	38.16564631	5.801977629	0.100928992	217.0625705	596710	149940	1097	NE	6.8	1455.6	Cambisol	4.98
16	378649	2707.2	19.82132979	12.43841608	3.832891899	40.65589876	52.21283298	11501.18	1.663375758	10.30097225	3.997415979	39.13084788	60.35019923	14208.38	5.123109602	10.70823106	3.960884491	39.42142412	58.79974253	581080	193680	589	NNW	9.1	1083.7	Cambisol	5.19
17	378650	2965.133333	6.82507512	20.66016593	3.697402644	75.03314436	88.67440033	12134.85614	0	20.61646707	3.681244815	69.24924722	97.71992486	15099.98947	1.340216679	20.62504807	3.684370597	70.38501133	95.94368612	628840	231160	500	SW	8.9	1176.2	Cambisol	4.31
18	378651	3549.382609	11.97431171	15.22789389	3.831892776	34.02699652	42.61706176	12984.49239	2.762358141	14.8926632	4.01474077	25.15585619	53.24004178	16533.875	4.739919226	14.9646283	3.968485382	27.06025375	50.9595709	628400	231100	500		8.9	1176.9	Stagnosol	3.62
19	378652	2780.88	12.74427675	24.81028056	3.485526968	99.54061269	114.5200953	7630.445	5.418269999	30.3208423	3.795243101	87.80484308	139.8873893	10411.325	7.375057021	28.84896327	3.688748482	90.93948416	133.1117483	598970	175510	1563	SSW	4.5	1555.3	Planosol	2.91
20	378653	3119.541463	19.03385615	19.53922946	5.840731573	0	131.4929704	11077.65854	2.515138137	24.07921202	6.156586174	0	148.6869393	14197.2	6.144785234	23.08164462	6.064923015	0	144.9089198	582400	209880	449		9.8	1010.9	Cambisol	4
21	378654	2881.442857	15.61843446	14.57073738	3.93418298	39.1472314	56.25813311	10149.32381	1.97960711	19.49866315	4.439822157	38.78992624	76.33328581	13030.76667	4.995508067	18.40897005	4.267430888	38.86893575	71.89414521	613520	215200	554	S	9	1131.7	Luvisol	5.72
22	378655	1845.963636	27.93593301	24.00156706	7.200251947	0	220.8948863	6413.982517	3.349949403	11.55555643	7.747042805	0	157.2073416	8259.946154	8.844516904	14.3370374	7.552909167	0	171.4404721	558620	170000	740	E	7.9	1284	Phaeozem	4.41
23	378656	1971.52	28.28309264	25.837149	5.124998471	1.446866722	169.4450169	4595.03	5.303809485	17.24279961	6.968996759	0.104216468	176.5841332	6566.55	12.20303607	19.82313962	5.633274405	0.507329492	174.4407077	606040	190140	823	SW	7.9	1261.8	Cambisol	3.93
24	378657	1559	33.56572514	17.01836434	3.759762485	45.08032037	70.68728248	7574.375	3.677171384	15.76266474	4.160213393	25.22677357	62.30688762	9133.375	8.778927888	15.97700344	4.060355584	28.61562812	63.73735944	606210	189740	837	WSW	7.8	1276.6	Cambisol	4.71
25	378658	2682.85	9.062584658	16.90684254	4.647564667	6.595484393	92.78294615	11114.275	2.029916414	15.13771748	5.028320152	3.73545602	90.2999402	13797.125	3.397418266	15.48172373	4.923554834	4.291588339	90.78276054	618820	215240	682	NNW	8.7	1241.2	Cambisol	4.2
26	378659	2846.054545	25.60647421	11.21717881	3.689042687	45.06327888	57.27764197	11642.07879	0.793455434	9.887678799	4.134518695	22.48028942	48.06680339	14488.13333	5.667734491	10.1488463	4.003713397	26.91650065	49.8761841	599480	219800	570	SW	9.1	1154.3	Podzol	4.07
27	378660	2873.781818	42.83550482	16.06425964	3.661323711	63.46328506	82.29151305	11176.91818	0.667312912	14.68246703	3.994463953	56.74510085	66.70324812	14050.7	9.291949636	14.9650843	3.902473589	58.11916731	69.89150724	623640	183400	988	NNE	7	1343.4	Cambisol	5.24
28	378661	3115.2	30.5379	28.95	7.71	0.1297	253.9765	6657.275	14.43810594	20.98162011	7.866657969	0.106521573	190.7131366	9772.475	19.57028366	23.52172351	7.810339437	0.113910227	210.8797812	615380	171420	610		8.7	1267	Stagnosol	4.41
29	378662	1331.2	61.42202524	26.51364183	6.436403853	0.181052404	238.4791708	2218.275	9.039039713	20.40350948	7.416862981	0.0733104	167.3180969	3549.475	28.68482686	22.69506195	6.792543295	0.11371811	194.0064442	641780	165960	1577	S	5.8	1490.1	Cambisol	4.74
30	378663	2647.85	29.66217856	21.442746	4.581737855	5.667501027	164.1050511	7943.89	2.904762846	19.90868781	5.047758864	1.543188007	212.3145515	10591.74	9.593902043	20.29219005	4.877186793	2.574233164	200.2625633	618850	174660	630	WSW	8.7	1174.2	Luvisol	4.87
31	378664	3045.978947	23.30431339	16.73227845	3.181772684	97.67448855	126.6420034	3708.021053	19.48981816	13.53182503	4.31208038	37.12161535	99.80801851	6754	21.21011312	14.97519396	3.49010885	64.43028828	111.9098475	658340	178580	1556	S	4.9	1705	Cambisol	3.11
32	378665	2132.575	36.77375103	20.47555772	7.372677474	0.089322472	292.3904345	6202.425	13.32731578	14.00598758	7.559548593	0.066257058	192.6638479	8335	19.32626979	15.66127774	7.503568819	0.072158524	218.1796758	573320	165740	701	E	8.3	1289	Phaeozem	4.81
33	378666	3319.852174	9.674820088	10.48503181	4.74754959	1.974557812	58.45507125	11850.10497	0.686394186	10.97091253	5.632440396	0.221803145	121.3982476	15169.95714	2.653456122	10.86458051	5.241495128	0.605382764	107.6235191	572350	191050	572	NWN	9.1	1068.4	Cambisol	5.18
34	378667	2805.155556	26.28837367	17.56664554	5.643833509	0.175758836	117.3630039	7394.644444	7.337060787	16.41712155	6.891485923	0.041940559	126.901264	10199.8	12.54906304	16.73326438	6.144132408	0.078743348	124.2780456	569650	177650	680	N	8.5	1180.9	Gleysol	4.34
35	378668	3368.116667	17.11996613	12.70189448	3.782054931	39.402281	54.0700058	12657.48333	1.183631916	18.19368759	3.999476973	34.49635226	106.7627222	16025.6	4.532987501	17.03947185	3.943883942	35.5274363	95.68824037	579940	196590	580	NNW	9.1	1101	Luvisol	5.09
36	378669	2855.3	18.38941162	17.79640493	4.054159085	29.96961929	74.26717133	6555.5	3.95109473	24.01932957	4.787571981	5.981342592	126.229207	9410.8	8.33177716	22.13125239	4.418571684	13.25954704	110.463576	565270	177460	747	SE	8	1224	Luvisol	4.92
37	378670	2866.65	26.36511119	16.03675109	4.166557571	21.14312115	86.26785767	7366.283333	5.224407166	16.56602346	5.113320889	2.011707059	169.2107709	10232.93333	11.14675584	16.4177533	4.608433073	7.371174029	145.9751752	724525	278150	540	W	8.9	1028.6	Luvisol	6.42
38	378671	3088.64	15.61154881	21.49271006	5.102876333	1.431738461	95.89057914	11407.12	4.880417198	25.03884942	6.053764805	0	133.4139136	14495.76	7.166920447	24.28326656	5.624041132	0.305063321	125.4187432	723820	278400	540		8.9	1025.9	Luvisol	4.87
39	378672	3270	11.70529725	20.41703364	4.699868281	4.632577832	92.2811903	7363.1	5.299963907	24.70253697	5.69384865	0.194870322	203.2902161	10633.1	7.26979773	23.38461502	5.122671019	1.559599663	169.1515816	726810	276720	540		8.9	1032.9	Luvisol	3.92
40	378673	2853.366667	19.87396179	17.22120828	7.384609659	0	200.587481	7616.8	6.392218136	14.73516612	7.700742959	0	175.3031315	10470.16667	10.06631036	15.41267108	7.589543687	0	182.1937114	724000	278400	540	W	9	1024	Cambisol	5.19
41	378674	3091.566667	31.54905149	40.96446516	7.186938617	0	384.1505861	13123.53333	9.556654624	35.80924764	7.22947871	0	288.0306652	16215.1	13.74971918	36.79214004	7.221040022	0	306.3568638	723700	278510	540	N	8.9	1025.7	Gleysol	5.19
42	378675	2916.4	25.21817951	14.9669044	3.662831269	52.88496691	78.02549066	14099.2	0	25.34450182	3.948989694	40.34380201	104.1850435	17015.6	4.322286532	23.56582665	3.884585569	42.49330325	99.70140969	723755	278545	540		8.9	1025.7	Luvisol	4.32
43	378676	2782.1	53.8714372	50.40579059	5.494078515	0.540697495	295.4030266	11097.5	6.173183397	39.72364587	4.604760292	8.851345803	225.9882063	13879.6	15.73407218	41.86483112	4.688086534	7.185515761	239.9020779	684550	217000	1055	WNW	6.6	1874.5	Gleysol	NA
44	378677	3240.02	54.12899613	21.09226054	4.36753728	4.532526799	109.1874208	12874.37231	5.518969934	27.65898282	4.903341886	2.966837269	146.4763102	16114.39231	15.29268365	26.33865307	4.730331701	3.281640663	138.9788666	693580	222850	979	E	6.9	1931.8	Stagnosol	NA
45	378678	3137.8	13.02401874	14.36834725	3.901568112	16.31340033	37.07649816	12398.5	2.107534944	19.86974231	3.888955898	24.61578074	54.6142086	15536.3	4.312290442	18.7586491	3.891473786	22.93898451	51.0721923	689850	272920	419	NNW	9.4	927.3	Luvisol	6.09
46	378679	2870.671429	33.04616113	41.6265886	5.481283481	0	232.8463187	11111.15934	3.786670516	34.86803481	5.860039863	0	259.8625591	13981.83077	9.794065764	36.25566334	5.75086906	0	254.3157355	675900	247900	550	W	9.1	1161.8	Cambisol	5.12
47	378680	2922.9	20.86901605	5.499637346	2.999454539	11.14061822	27.70551245	7218.75	9.453948234	10.42440935	3.578829334	52.70757449	66.59972964	10141.65	12.74385685	9.005052925	3.322123444	40.72766427	55.39012298	657925	206880	961	S	6.9	1729.6	Podzol	4.37
48	378681	3163.02	37.83040361	25.76717188	3.513885606	89.58891529	114.9512195	12502.74429	3.854916558	21.39599689	3.977349197	49.40114436	59.42569416	15665.76429	10.71478902	22.27856563	3.835880352	57.51531746	70.63665993	630900	222250	667	SE	8.7	1263	Stagnosol	4.02
49	378682	2793.085714	43.8772	52.8	6.83	0.1363	297.343	9799.684874	5.647909465	45.25113787	6.504004302	0.13273368	226.9406527	12592.77059	14.12719403	46.92548101	6.558090702	0.133524693	242.5559447	685375	233775	500	E	9.4	1345.7	Stagnosol	4.08
50	378683	3112.64	16.96412049	15.86693675	3.524845566	48.44816224	67.15965533	12668.94889	1.498127916	20.58753319	4.06320004	24.39949685	72.24234406	15781.58889	4.548522111	19.65647882	3.891748982	29.14267185	71.23987337	633300	269450	337	E	10	1077.7	Luvisol	4.26
51	378684	3650	13.45330547	20.09287671	6.226570248	0.136002214	191.5488712	13008.45	4.520114467	23.23783233	7.296567509	0.026247994	261.4117378	16658.45	6.477448262	22.54874733	6.770852912	0.050296024	246.1042234	690875	277250	410		9.5	919.1	Cambisol	5.24
52	378685	3406	15.74603376	8.276321198	3.909373184	16.36581288	25.85992788	10125.38889	4.777437312	6.841690251	4.504719169	3.463921683	106.546773	13531.38889	7.538354157	7.202802702	4.264247939	6.711470162	86.23700312	688150	274400	370		9.6	963.4	Luvisol	4.58
53	378686	2616.28	26.03060529	25.57502484	3.798702918	31.93386297	59.75341556	11083.4	0.814430409	39.53452442	3.674505283	106.532837	147.5252096	13699.68	5.630059242	36.86862569	3.695639764	92.28638718	130.7630962	688750	265700	647	W	8.5	1525	Luvisol	4.61
54	378687	1028.314286	146.3499767	60.47398516	7.173760542	0.187847487	575.8459876	3267.385714	20.4219751	36.60049581	7.544085815	0.098373903	269.8585354	4295.7	50.56690212	42.31538515	7.422787034	0.11979229	343.1064969	664375	259275	410	N	9.3	1136.8	Kastanozem	4.98
55	378688	1233.9	90.36290635	23.23726801	7.319130365	0.141294035	315.9779716	3195.946154	20.58590208	8.259870316	7.555510707	0.108466338	206.8086245	4429.846154	40.02175664	12.43171069	7.475790104	0.117610243	237.2169169	603600	234200	960	N	7.2	1601.1	Phaeozem	4.5
56	33611	3042.28	10.01597	17.44540805	3.666967671	43.97513536	58.86885066	11834.32	1.485610394	22.48777488	3.921803881	44.33167399	82.37064214	14876.6	3.230077706	21.45660568	3.856137834	44.25876147	77.56450161	629000	229500	520		8.9	1191.6	Luvisol	5.47
57	378689	3053.751724	14.3565164	15.67708235	3.776897116	40.4195813	69.33624291	12092.21494	0.317595122	17.35635341	3.888933337	44.2727119	84.09647256	15145.96667	3.148142753	17.01777635	3.863898804	43.49583813	81.12049369	629200	229450	500	E	8.9	1182	Luvisol	5.14
58	378690	3072.7	22.97801087	16.75995053	3.510891924	58.79583131	75.81079911	12808.5	1.6367666	16.99055705	3.857391463	49.29916931	87.52208402	15881.2	5.76587783	16.94593922	3.765305887	51.13658671	85.25618061	629520	229500	490	ENE	9	1174.5	Stagnosol	5.12
59	378691	2848.933333	21.87801148	17.09941031	7.500296326	0	185.9551883	10679.85238	7.227068273	16.39011071	7.618819099	0	144.9273999	13528.78571	10.31230899	16.5394772	7.591030591	0	153.5671578	614720	210830	540		9.1	1128.1	Calcisol	5.05
60	378692	2201.955556	46.785855	24.5678286	4.188041659	29.6860004	40.6229302	5634.544444	53.77453611	27.00075487	4.494635925	25.34303947	30.89775517	7836.5	51.81080674	26.31713392	4.384641312	26.56335555	33.63040408	707950	98150	1112	S	7.8	2016.5	Umbrisol	3.81
61	378693	2511.133333	53.79933894	46.43670056	5.461561535	0.09010622	275.7962591	9715.046667	10.8923098	45.01354963	5.640146146	0.17453502	239.3588811	12226.18	19.70497828	45.3058504	5.596992703	0.157194201	246.8427489	NA	NA	NA	NA	NA	NA	NA	NA
62	378694	3186.266667	20.01235784	34.72430849	4.3675904	16.21692466	197.8160329	11141.16667	4.428254171	51.34264335	4.717223567	8.72888091	308.6500281	14327.43333	7.89399077	47.64690489	4.611693671	10.39414109	284.0017428	684975	217090	1100	N	6.2	2044.8	Gleysol	4.2
63	378695	3019.85	25.43694105	40.20693081	4.445916449	50.63975026	199.7330266	12331.175	2.112501325	44.95006457	5.361026892	6.727573473	378.6848318	15351.025	6.70087958	44.01699642	4.976995254	15.36596648	343.481475	684900	217090	1107	N	6.2	2044.1	Gleysol	NA
64	378696	2868.5	31.32744252	35.55169252	6.515453513	0	309.497899	13162.53846	4.313718597	48.4727161	6.773548728	0	303.0533374	16031.03846	9.147395919	46.16070392	6.714649374	0	304.2064895	684680	216850	1071	SW	6.5	1915	Gleysol	3.71
65	378697	3056.5	25.86431435	15.03538361	3.590571841	81.8901967	98.33694459	11879.58333	1.880302315	17.54951212	3.969234516	57.6226507	63.4247367	14936.08333	6.788358272	17.03502424	3.860417242	62.58872866	70.56912395	684800	218775	1065		6.6	1883.3	Podzol	3.38
66	378698	2820	22.15707276	27.28937234	3.554665759	117.3052009	136.6706907	12118.225	3.558227501	18.33606345	4.203773448	33.78577018	41.78374717	14938.225	7.069270052	20.02624626	3.985571621	49.55235521	59.69626226	671000	212410	617	NW	9.2	1547.4	Stagnosol	4.33
67	378699	2139.533333	75.85815505	28.74573116	3.82689878	75.03411466	186.7829045	7772.716667	17.23175534	39.18137352	4.056755024	33.12413343	188.9600242	9912.25	29.88611095	36.92886731	3.995833388	42.17029367	188.4900986	587500	170100	1375	NNW	5.2	1643	Gleysol	NA
68	378700	3241	26.85504284	10.08436902	3.579807346	31.45955524	53.01295367	10536.34	2.303549361	6.878388511	4.028142388	18.75933996	28.71220674	13777.34	8.079075722	7.63256768	3.874259881	21.74695569	34.42874714	642925	265945	310		10	1112.1	Cambisol	5.91
69	378701	3094.782609	48.11924585	5.348127283	7.374997566	0.835376562	266.3987533	11720.11739	6.403902387	3.908413812	7.703159145	0.572332661	149.46048	14814.9	15.11809685	4.209165097	7.611200458	0.627281644	173.8884906	588475	214050	440	NNE	9.6	1046.9	Kastanozem	4.19
70	378702	2540.5	34.95199567	12.74465656	4.182178123	20.48289223	62.26742397	4714.6	4.812587944	22.35535358	4.201837945	27.10618002	100.4293244	7255.1	15.36642805	18.99000014	4.194852007	24.7869201	87.06626832	528025	176625	620	SE	8.6	1250.7	Podzol	5.47
71	378703	1245.542105	41.49612677	12.94391239	3.343508601	27.61468783	48.14089231	5136.137895	8.719186382	17.93578443	4.484297416	6.952984683	76.80406333	6381.68	15.11641397	16.9614976	3.939747785	10.98562518	71.2097392	669100	180650	1842	WNW	3.1	1750.6	Podzol	2.64
72	378704	1509.766667	80.09362352	14.62718301	3.166581863	60.1730659	114.6962359	3067.458333	17.94899317	21.75963515	4.200346392	17.41650099	27.93984072	4577.225	38.44697861	19.40704412	3.573466323	31.51946436	56.55585011	790220	149600	1942	E	0.8	1024.5	Podzol	2.93
73	378705	2611.2	49.77656509	28.33237592	3.641172539	95.71880046	161.620308	10446.2	8.654181392	36.32679443	4.059254261	45.1034345	126.2611661	13057.4	16.87777631	34.72808216	3.93746455	55.22542231	133.3322363	584325	134550	1330	ENE	5.5	1657	Cambisol	3.03
74	378706	1988.466667	39.14100376	8.501726624	4.370114486	15.44076016	65.96794396	3860.933333	11.59096531	4.330528024	4.558770094	11.38395875	19.58412474	5849.4	20.95642726	5.748500701	4.485073947	12.76304282	35.35201177	709750	142470	888	SW	8.5	1626	Umbrisol	4.35
75	378707	1900.2	48.46960868	8.5	4.308214394	24.1398198	60.20007853	NA	NA	NA	NA	NA	NA	6159.442857	28.76293467	5.317534517	4.439498348	18.88666136	33.76207446	709425	142420	757	SW	8.8	1573.5	Umbrisol	4.33
76	378708	1682.68	37.63106739	8.5	5.014792414	3.81563159	52.28975509	3937.186667	40.66126035	8.5	5.858071824	0.743265042	77.45867342	5619.866667	39.75397102	8.5	5.412819598	1.663181839	69.9226876	713810	137625	621	SW	9.7	1560.2	Phaeozem	4.76
77	378709	1349.82	42.24315944	5.342231557	4.139080219	22.65138302	37.65242422	1036.98	21.20999398	2.713575961	4.745897978	10.19080479	14.50917706	2386.8	33.10499457	4.200173873	4.311085695	17.23770344	27.59750364	714570	137460	852	SW	9	1642	Cambisol	5.19
78	378710	1149.5	170.7543326	16.90042192	3.949931942	65.29256264	90.19078091	2398.9	99.94498247	8.828913252	4.249692832	41.75017924	47.87843243	3548.4	122.883588	11.44366898	4.128442231	49.37670661	61.58546788	697960	114285	523	NW	9.9	2100.3	Cambisol	4.71
79	378711	1719.5	66.26555343	7.329153824	3.945243975	37.30903742	53.29382058	5122.22	26.51264189	4.863684691	4.548830072	16.34138138	19.75374784	6841.72	36.50356981	5.483320422	4.303930808	21.611092	28.18322976	720075	111800	700	NW	9.3	1941.8	Umbrisol	4.98
80	378712	1412.5	99.63315646	12.75117168	3.885573585	59.66547352	79.55865202	5466.542857	11.90086019	3.475099436	4.692987783	13.05021353	15.54912507	6879.042857	29.91526584	5.379790585	4.368182333	22.62190194	28.69244438	719825	111875	590	NNW	10.1	1752.7	Cambisol	5.29
81	378713	1801.24	72.60119229	8.403986143	3.278405977	77.63672198	106.085671	2861.66	52.56680926	5.359429143	3.970314388	38.45121064	41.40570939	4662.9	60.305927	6.535516524	3.569946394	53.58825206	66.39104773	729625	118450	1645	N	4.5	1692.1	Podzol	3.29
82	378714	1882.1	57.30930716	5.672562563	3.967470378	38.69239298	47.89571857	5305.7	4.041245076	1.651966753	4.591069132	9.213939344	13.88051192	7187.8	17.98929867	2.704745541	4.32653606	16.93276813	22.78727343	728475	118975	1450	N	4.9	1704.4	Cambisol	3.78
83	378715	1943.78	48.01331031	8.5	3.970522289	36.04576045	45.80328437	5974.17	25.22676253	4.75667666	4.3	17.56517444	20.31426771	7917.95	30.82063921	5.675626267	4.193221875	22.10197923	26.57157431	728025	119100	1415	N	5	1704	Cambisol	4.91
84	378716	1739.7	77.00895729	4.696893142	4.296965541	15.56572344	22.19232136	7294.8	24.06983056	2.052580605	5.03383101	1.349211697	8.871220572	9034.5	34.26388655	2.56177431	4.764777336	4.086769446	11.43635633	728600	119480	1307	NW	6	1715.7	Umbrisol	5.31
85	149218	1949.966667	37.1791258	4.994493068	4.215759154	22.13632716	26.65636734	4497.866667	15.82177981	3.597137161	4.548818955	12.69176216	16.27463538	6447.833333	22.28071114	4.019728333	4.418898376	15.54800642	19.41429954	730500	119500	915	E	8	1722.9	Umbrisol	4.61
86	378717	1328.3	82.44495144	8.263084394	3.898443792	40.54538396	56.02722106	4231.066667	36.17756807	7.093111272	4.316963632	25.12184103	28.89031864	5559.366667	47.23223832	7.37265306	4.174767623	28.8069896	35.37414128	730250	120695	542	N	10.1	1647.3	Umbrisol	5.36
87	378718	1894.65	39.77214446	5.100510648	4.151598525	31.71517914	47.02360245	5125.983333	14.87844827	1.92683729	4.419531506	16.75156113	22.01214645	7020.633333	21.59648056	2.783312759	4.329533055	20.789775	28.76195845	728825	119130	1348	E	5.2	1703.1	Cambisol	5.49
88	378719	1689.35	83.91109453	8.5	3.927982208	50.20305505	67.15623002	4879.65	13.11002422	5.823066204	4.681117238	11.16625182	14.65016927	6569	31.31793838	6.511493378	4.338797103	21.20534811	28.15315507	730450	120125	915	NE	8.6	1718.3	Umbrisol	5
89	378720	1606.575	59.80141466	5.851583337	3.456957197	39.84088144	73.36888167	2838.236111	31.53355702	2.768002721	4.512163805	10.22403139	28.7108635	4444.811111	41.7509616	3.882561564	3.836111216	20.92902867	44.85248431	696700	150475	1675	N	3.8	1863.5	Podzol	3.94
90	378721	1731.44	65.07053108	5.725604699	4.208410341	12.40497151	50.04227083	4406.493333	22.17557671	2.526800752	5.102182498	1.803927949	21.94960643	6137.933333	34.2757472	3.429146347	4.635801787	4.794359723	29.87422213	696125	150500	1645	NE	4.1	1826.7	Cambisol	3.69
91	379403	1790.955556	73.7975078	7.396513035	4.195199038	27.63239043	48.86256161	NA	NA	NA	NA	NA	NA	7578.6	36.823319	3.377839575	4.597226625	10.13985257	17.91846908	694125	151660	1312	NNE	5.2	1656	Umbrisol	4.42
92	379404	1911.133333	54.009842	6.843419263	4.720694987	6.770073105	69.98001014	3138.266667	23.55597499	2.326775927	5.502143185	0.771251709	52.08436744	5049.4	35.08237424	4.036267675	5.038288794	3.0417289	58.85763937	694750	151935	1059	NE	6.4	1590.1	Cambisol	4.89
93	378724	1832.333333	38.08571603	36.86880662	5.682225636	0.310374499	250.9707017	2716.233333	10.03329102	32.63807356	7.161723862	0	222.3830553	4548.566667	21.33386045	34.34237159	6.056260905	0.125030495	233.899232	770600	187950	1325	NW	5.2	1047.1	Calcisol	4.31
94	378725	2060.2	27.73553733	16.56844967	4.550830666	2.364430026	157.1893502	NA	NA	NA	NA	NA	NA	5502.1	15.41477436	9.206564766	4.976400271	0.885334461	140.3475236	747875	186360	670		8.9	1074.5	Calcisol	3.11
95	378726	298.8666667	95.25392237	16.43049297	7.379044067	0.205909257	405.7890715	794.6333333	18.44677667	7.395603842	7.597232259	0.011572264	131.8127599	1093.5	39.4390909	9.864947417	7.525945175	0.064686895	206.6937722	772325	182830	1739	NNW	2.3	1069.9	Phaeozem	2.32
96	378727	2014.061905	16.24938646	19.50917832	4.539134212	9.751875596	106.645088	3236.288095	6.858387946	9.997241806	6.224542889	0.176435031	101.6931518	5250.35	10.46082442	13.64607074	4.941083636	3.84962445	103.5927406	771150	182540	1682	NE	2.6	1057	Podzol	3.12
97	378728	661.3	42.00122637	13.04567519	7.545653852	0	253.2747596	NA	NA	NA	NA	NA	NA	3578.85	28.49518574	12.09581569	7.601798458	0	218.1416018	745500	185350	917	SW	7.6	1084.8	Calcisol	3.05
98	378729	2078.4	47.34595554	8.138279446	7.480688022	0	226.2549842	2787.7	20.6348992	7.834080066	7.560269876	0	188.4311156	4866.1	32.0436782	7.964009165	7.524481383	0	204.5863792	745300	185380	829	SW	8.3	1054.3	Kastanozem	2.71
99	378730	1070.2	87.16608531	16.50969445	7.659447968	0.06236097	430.2066847	894.7636364	35.595	18.05	7.74	0	283.266	1964.963636	63.68273378	17.21108626	7.694288138	0.033964349	363.2959394	745200	185450	777	N	8.3	1054.4	Calcisol	2.28
100	378731	1669.2	39.61238677	32.62207045	6.019590131	0.230808339	191.4382503	2200.7	10.19343777	27.40490526	7.165000082	0.067040778	167.1942612	3869.9	22.88268289	29.65521977	6.345633823	0.137678472	177.6513961	773405	189390	1784	SE	2.9	1115.2	Cambisol	3.72
101	378732	1733.3	37.96523741	12.1666359	4.505533618	20.04636834	96.1706045	3421.125	10.91020936	9.281125726	4.963195896	4.668608581	77.67223169	5154.425	20.00811652	10.25144827	4.75144953	9.839752015	83.89275669	776240	187250	1848	N	1.5	1076.7	Cambisol	2.98
102	378733	2018.8	70.27710917	8.5	7.59538331	0.204955736	345.6794598	7449	21.86579816	8.5	7.636548757	0	199.815801	9467.8	32.18844489	8.5	7.627437906	0.0437023	230.9180164	741990	186315	1043	S	7.5	1221.5	Kastanozem	4.1
103	378734	3069.255556	28.66652102	24.15599512	4.573205551	6.279428732	170.4790168	3033.294444	9.654034466	12.57039449	7.222934081	0	183.1648313	6102.55	19.21629614	18.39733062	4.870723436	3.158216077	176.7845465	742925	186980	980	ENE	6.8	1221.4	Cambisol	4.11
104	378735	1433.8	53.77560783	21.16965755	6.560740761	0.114136783	248.3040803	3227.95	7.547411205	12.85010068	7.504936058	0	157.7972686	4661.75	21.76567437	15.40892101	6.973810922	0.035104697	185.6341682	813200	183800	1407	N	4.3	788.9	Phaeozem	3.89
105	378736	1055.7	307.4061657	33.2	5.72032516	0.051871611	1046.36148	6455.409091	140.8630453	25.85002338	6.473390985	0	526.8523463	7511.109091	164.2709828	26.88307592	6.254480581	0.007290649	599.8702968	813350	183800	1422	N	4.3	788.5	Stagnosol	3.97
106	246564	2039.3	32.3297048	20	4.921626607	3.252901829	147.7494783	1456.866667	8.920248478	22.12437652	5.581159768	0.334001382	136.4272419	3496.166667	22.5748905	20.88523621	5.092606702	2.03658431	143.031457	812750	183250	1490	WNW	3.8	813.7	Cambisol	4.64
107	378737	1609.4	10.33234808	13.56179321	4.061451618	18.82636914	61.22953428	922.8666667	1.861719642	3.5	7.346641131	0	100.6318221	2532.266667	7.245287489	9.894843882	4.258167936	11.96523213	75.58941924	817770	184690	1457	NW	4.2	777.5	Regosol	3.76
108	378738	1398.7	20.95811003	7.208422106	7.493111439	0.065154994	165.7426103	1774.05	10.61343874	2.711084806	7.788590367	0	150.1985818	3172.75	15.17386479	4.693726263	7.633360669	0.028723439	157.0511332	817850	184250	1472	SSE	4.1	781.8	Regosol	3.36
109	378739	1289.659091	23.82500382	8.724177637	6.721861757	0.022506529	170.2372286	2194.840909	11.01510575	3.59468195	7.716696801	0	153.9630056	3484.5	15.75621682	5.493175491	7.08451678	0.008329961	159.9863087	817900	184325	1455	SE	4.9	738.4	Calcisol	3.51
110	378740	2432.718182	59.6719518	9.020580794	7.459598805	0.03265719	307.6915793	7342.981818	4.583769875	2.951919891	7.724647949	0	123.1882655	9775.7	18.29266251	4.462128032	7.642120726	0.008126859	169.1025802	827460	192480	1086		6.8	705.8	Kastanozem	4.39
111	378741	1224.636	23.07298159	10.38582403	3.969108075	29.69537889	45.07083971	758.364	11.48662484	3.636830071	4.410533739	13.57621277	19.66417246	1983	18.64198015	7.8047882	4.09060629	23.53088303	35.35449992	803400	181900	1525	S	3.7	836.1	Podzol	4.39
112	378742	1095.4	21.72042085	8.462114296	3.682557941	24.34552962	43.63975798	3974.025	10.27400463	7.585530413	4.371417168	10.4383445	17.54571959	5069.425	12.74734319	7.774942424	4.10672758	13.44340534	23.18411243	805500	182400	1640	NNE	3.1	860.6	Podzol	4.24
113	378743	178.8777778	63.4649736	8.5	3.697221477	26.25825713	123.8334569	701.8222222	29.5733975	8.5	3.55242305	35.0737156	83.41723138	880.7	36.45706938	8.5	3.578181412	33.28321984	91.62611592	826590	164010	1751	SE	2	854.7	Umbrisol	4.29
114	378744	1015.224138	6.815514902	9.684467503	3.24739682	35.71970413	50.47025058	3073.575862	0.550455995	8.5	3.448255792	15.3263608	20.78759013	4088.8	2.106031965	8.794096067	3.389069464	20.38990375	28.15761394	826325	164700	1705	ENE	2.4	846.7	Cambisol	4.89
115	378745	1365.666667	22.72888333	5.016639004	3.53172647	37.85214426	52.52619459	3342.833333	3.689094082	1.996860946	4.500246019	6.665698674	10.94200402	4708.5	9.211448444	2.872725921	3.967799598	15.71110362	23.00320035	808130	183210	1469	NNE	4.1	808.9	Podzol	4.3
116	378746	1361.26	16.8307449	8.5	3.96589244	22.8343914	35.82902848	2467.44	3.90449016	4.313474694	4.576567002	5.860784881	9.758290348	3828.7	8.500304281	5.801956278	4.255359237	11.89559869	19.02750783	807690	183320	1394	NW	4.5	798.2	Podzol	3.75
117	378747	856.5181818	60.50581392	8.336245051	5.260283016	0.917991969	240.9785582	2284.856818	14.85533443	5.453051564	7.131910179	0.208885386	141.0586438	3141.375	27.30226155	6.239174724	5.809369132	0.402228327	168.3025174	806350	183250	1380	ENE	4.8	794.4	Kastanozem	4.48
118	378748	182.9	45.90007654	8.5	2.844985109	85.08894237	153.4942911	NA	NA	NA	NA	NA	NA	NA	NA	NA	NA	NA	NA	826570	164530	1709	N	2.2	849.2	Umbrisol	3.16
119	378749	1524.3	7.578006954	5.391189398	3.267764493	47.61506246	62.12296247	3214.8	0	3.5	3.65	11.1821	14.1141	4739.1	2.437415543	4.108288494	3.487463327	22.9005201	29.55583135	822820	166770	1762	E	1.7	857.1	Cambisol	3.97
120	378750	1290.257576	6.192886518	8.5	3.040533934	20.80522222	30.36400423	4808.077908	0.102129263	3.726953918	3.430096397	6.785923575	10.28003188	6098.335484	1.390783472	4.736812901	3.31373522	9.752061848	14.52930573	822480	166780	1828	ENE	1.4	861.8	Cambisol	3.45
121	378751	533.7	48.36666105	10.13443882	4.084830632	22.87700482	154.2370707	884	5.757647059	6.187782805	3.694126108	30.74042878	62.25980606	1417.7	21.7980158	7.673520491	3.803896922	27.78020492	96.88509078	826790	164240	1729	ESE	1.3	869	Cambisol	3.25
122	378752	1214.4	31.59043972	15	6.640403354	0.07992677	174.3854012	3304.233333	5.737707133	8.998678463	7.563746368	0	128.3026439	4518.633333	12.68572795	10.61155659	7.088959677	0.021480625	140.6875613	826830	164300	1718	SE	1.3	868.9	Cambisol	3.9
123	275561	1063.157143	22.6169811	8.737083619	3.434984685	46.08974934	77.98874715	4613.6	4.215091816	5.409885215	3.976963685	15.00739851	25.08829791	5676.757143	7.661443235	6.033011176	3.811108057	20.82857819	34.99562512	826750	164500	1695	N	2.4	846.9	Cambisol	4
124	378753	1412.95	20.81262813	18.57679323	3.914402027	38.0438093	116.1541638	1906.983333	15.96121824	10.92238002	7.19865039	0	155.2415464	3319.933333	18.02595838	14.18006687	4.285100085	16.19128909	138.6061168	823370	188750	1175	NNW	6	704.8	Cambisol	4.72
125	378754	2163.8	18.69606654	15.54057445	4.347463809	12.70222439	100.2400295	6235.711111	4.798002259	3.661007744	7.286135912	0	111.9939847	8399.511111	8.378285814	6.721305671	4.9350617	3.272222964	108.9660456	823600	189200	1160		6.2	704	Cambisol	4.21
126	378755	1606.1	54.81015597	14.36784758	5.094959679	1.144750576	245.7905471	2112.1	9.009270158	13.61573789	7.590836147	0	157.7918974	3718.2	28.79325238	13.94061643	5.457700395	0.494482249	195.8034705	830290	203780	1461	NNE	3.5	886.1	Cambisol	5.5
127	378756	1777.033333	25.92862861	14.77608749	5.464090758	0.35341812	103.8174707	5297.066667	7.33872851	11.23932428	7.131581281	0	149.6128838	7074.1	12.00856243	12.1277689	6.037084458	0.088779602	138.1089503	829400	204200	1540	N	4.1	866.3	Cambisol	4.52
128	378757	1906.6	28.65169464	16.4307773	5.397396093	0.374623497	146.3162912	5282.8	6.219606364	16.7050636	7.036761849	0	134.3917051	7189.4	12.16850606	16.63232398	5.947063873	0.099348647	137.5540574	831530	203070	1280	NNE	4.7	829.7	Luvisol	4.59
129	378758	1268.1	54.48046605	15	7.669343559	0	320.4119095	3722.7	20.45798789	12.11186773	7.709050637	0	185.8043226	4990.8	29.10267502	12.8457061	7.698612415	0	220.0064307	831680	202620	1353	ESE	5.8	774.9	Calcisol	3.95
130	378759	1767.184211	31.8846347	7.357162897	4.459053603	9.53372608	62.88219992	5809.065789	11.03076636	10.03617621	5.46648571	1.157445183	43.18278217	7576.25	15.89499693	9.411287906	4.969619877	3.111239124	47.7777335	826950	203850	1817	NNW	1.6	975	Podzol	4.56
131	378760	1963.777143	19.98242524	2.734143531	4.317662094	14.29731281	27.35785524	4855.422857	5.057567339	1.774144432	4.522019851	6.847729223	10.63141427	6819.2	9.355592738	2.05060271	4.452707429	8.993042747	15.44825531	806170	175350	1990	S	1.9	872.9	Podzol	2.67
132	378761	1140	37.38266053	12.46294737	7.236472509	0.038027053	188.5796978	NA	NA	NA	NA	NA	NA	2124.15	21.04263364	8.37977897	7.381876537	0.020408559	142.4059374	771675	182525	1620	N	3.2	1061.7	Cambisol	3.92
133	378762	1719.36	36.82425989	21.3162514	7.276951033	0	174.3352664	3504.054286	10.26368067	15.02133202	7.562747625	0	144.2410178	5223.414286	19.00646747	17.09339294	7.446647302	0	154.1469614	763450	205200	672	SSW	9.6	1199.9	Phaeozem	5.64
134	53722	1941.336364	33.6018185	22.31487424	7.440209926	0	201.5905883	3342.663636	6.797657897	23.0466079	7.535062173	0	171.641521	5284	16.64547994	22.77776968	7.497763634	0	182.6447787	762000	206500	635	WSW	9	1176.8	Kastanozem	5.05
135	378763	2334.166667	34.07051153	20	4.359540621	11.36927566	98.22007215	428.1333333	16.1	20	5.17	0.2479	87.1659	2762.3	31.28523296	20	4.420526659	9.645555707	96.50676817	759800	204050	722	E	8.4	1224.6	Cambisol	4.57
136	378764	1545.828571	63.27651555	35	7.462918488	0	311.0837718	3513.371429	29.31880402	35	7.624060788	0	237.0854465	5059.2	39.69451573	35	7.568198571	0	259.6954887	759600	204550	862	E	6.9	1282	Calcisol	3.2
137	378765	2564.192308	10.28830983	16.82264516	4.15290158	14.45157977	28.6436284	10823.70769	3.607852705	20.49936944	4.714894478	3.779124876	52.30706239	13387.9	4.887364561	19.79516429	4.536760086	5.823226396	47.77479106	756200	213250	697	ENE	8.6	1266.2	Luvisol	5.66
138	378766	2121.1	36.86531446	20	6.156060412	0.078522785	154.2099614	6174.133333	18.39172726	20.31815262	6.634538688	0	137.1155827	8295.233333	23.11544319	20.23680065	6.45446938	0.02007836	141.4866335	756600	213000	622	NNE	8.5	1260.5	Phaeozem	6.3
139	378767	2538.4	24.37247361	19.91799953	4.406013824	12.01474309	97.89193425	1522.5	7.227070279	20	7.168539531	0	167.3269908	4060.9	17.94437231	19.94874289	4.609626248	7.510212972	123.9243097	757640	212000	680	NE	8.8	1222.3	Cambisol	3.63
140	378768	1840.46	22.45902628	7.825195332	7.535013228	0	176.170548	1110.34	2.302734298	3.393835222	7.706005825	0	109.4154174	2950.8	14.87452809	6.157743663	7.591749127	0	151.0516339	763500	204400	540		9.3	1110.5	Regosol	4.2
141	378769	1160.325	59.5525	20.6	7.51	0	247.1457	2558.275	39.28164904	22.84414889	7.625855224	0	233.8178428	3718.6	45.60681849	22.14390093	7.586282685	0	237.9765708	755890	212360	793	WSW	8	1419.5	Phaeozem	5.09
142	378770	2666.5	24.21972456	10.0840765	7.650577467	0	159.6763885	2206.9375	15.27538911	7.600795786	7.714815437	0	135.2830035	4873.4375	20.16927981	8.959522155	7.678497008	0	148.6298374	755860	211790	490		9.8	1196.1	Phaeozem	5.93
143	378771	2581.957143	21.08629453	17.41843812	3.77663484	22.43437762	40.30671345	7543.642857	6.092074689	11.71487979	4.277819462	7.747875015	46.04127453	10125.6	9.915495822	13.16924725	4.086489146	11.49283041	44.57900159	764700	194975	1470	N	3.7	1378.3	Cambisol	3.41
144	378772	664.9	51.7323951	24.46535569	5.940609003	0.221103354	174.4761296	NA	NA	NA	NA	NA	NA	664.9	51.7323951	24.46535569	5.940609003	0.221103354	174.4761296	759680	202200	659	ESE	8.9	1180.4	Leptosol	4.23
145	378773	1752.88	30.22519068	32.45630049	7.249629819	0	222.2870686	2057.386667	8.699182442	32.64509507	7.661560219	0	187.5317181	3810.266667	18.60203508	32.55824177	7.424088202	0	203.5206144	759530	201700	688	ESE	8.5	1198.6	Kastanozem	5.97
146	378774	2074.225	36.60960039	22.11347551	7.555878077	0	261.9863334	5961.225	13.78468236	15.03422011	7.694599835	0	170.6810736	8035.45	19.67657586	16.86161852	7.654336599	0	194.25009	762580	195340	917	WSW	8.1	1192.8	Kastanozem	2.69
147	378775	2019.76	59.97198048	20.50575811	6.615686876	0.161860162	248.0924015	4495.34	7.447250086	23.5	7.118143193	0	139.8350378	6515.1	23.73055341	22.57174871	6.89389698	0.050178613	173.3961333	764050	186550	1667	NW	2.6	1090.4	Gleysol	2.24
148	378776	2289.5875	38.72459708	26.27792752	6.151669254	0	171.5439329	4211.4125	13.51930607	19.14559322	6.820494011	0	125.0600375	6501	22.39635871	21.65753038	6.460530573	0	141.4312028	764000	186200	1822	NNW	2.1	1119.2	Cambisol	2.99
149	378777	911.74	24.05798978	23.5	7.368558417	0	196.4521116	3098.093333	3.462802099	15.86083914	7.616994594	0	151.5224549	4009.833333	8.145654191	17.59780124	7.546768729	0	161.7383821	766260	186600	1473	WSW	4.1	1091.5	Calcisol	3.41
150	378778	1573	43.91655167	26.67313732	5.491686439	0.266560903	164.3449563	4329.4	8.925359519	17.27202037	7.236474061	0.092518781	148.4770871	5902.4	18.25057388	19.7774346	6.044989466	0.138901313	152.7059022	766550	185680	1664	NW	3.6	1073.3	Cambisol	3.23
151	378779	NA	NA	NA	NA	NA	NA	NA	NA	NA	NA	NA	NA	NA	NA	NA	NA	NA	NA	772690	186580	1460	E	4	1054.6	Histosol	4.51
152	378780	2120.153846	24.09220017	20	3.519736732	38.77502837	93.08356984	3095.246154	7.654986704	22.71202986	5.607121808	1.208881272	106.6990961	5215.4	14.33700943	21.60954097	3.905502942	16.48019531	101.1641399	771720	187260	1656	N	2.1	1096.8	Podzol	3.41
153	378781	1786.15	48.53512415	22.69036335	5.45357544	0.405685737	167.098122	2992.05	11.5590864	16.27990258	6.735795896	0	98.21503696	4778.2	25.38118464	18.67621175	5.844506857	0.151650324	123.9643824	762100	190500	1430	S	4.9	1087.2	Cambisol	4.16
154	378782	245.7564103	32.19088275	13.99261725	7.378787196	0.076175673	173.8593348	1747.09359	5.742498296	24.86917551	7.755857933	0	126.3588566	1992.85	9.004088491	23.52788845	7.687481243	0.009393913	132.2165714	763740	190425	1210	S	6.1	1055.2	Calcisol	3.37
155	378783	1118.536364	28.95633348	14.21664147	4.941941367	4.002006895	179.3470842	NA	NA	NA	NA	NA	NA	4226.154545	11.58869688	9.939490553	5.515674413	1.059211203	136.3566897	761350	194150	752	WNW	8.6	963.3	Cambisol	4.14
156	378784	1756.166667	14.82084009	8.5	7.520570762	0.158795591	147.2646641	5886.733333	10.63520396	8.5	7.667604017	0.125889057	150.4905608	7642.9	11.59696908	8.5	7.629149888	0.133450239	149.7493222	750525	190090	856	SSW	8.8	1077.1	Calcisol	4.7
157	378785	2270.1	19.63618563	15.8083014	5.239209318	2.474334699	111.7354003	4957.725	10.36868173	13.77341296	7.228601454	0	178.2317877	7227.825	13.27939977	14.41252642	5.732559937	0.777133813	157.3467429	752550	189550	610	SSE	10.2	1000	Calcisol	5.01
158	378786	1309.5	41.02360825	35	6.568488678	0.1085252	212.7179655	1793.6	12.05590321	36.67010482	7.665506347	0	169.230976	3103.1	24.28019819	35.965325	6.898033052	0.045797348	187.5823707	754110	187725	814	NNW	8.1	1051.1	Calcisol	4.51
159	378787	1555.56	25.73812176	35.67589807	6.143503419	0.101877305	153.1747465	1532.44	11.01864151	37.5	7.220660934	0	152.6214043	3088	18.43348435	36.58112047	6.406874783	0.051320032	152.9001469	758130	188890	1303	NNW	5.1	1075.3	Cambisol	5.33
160	378788	1659.5	30.73968967	20	4.756139702	2.170107725	102.2978606	994.94	11.55360479	20	6.856684173	0	116.4044428	2654.44	23.5483411	20	4.958074593	1.356705659	107.5853046	758220	189050	1243	NNW	5.1	1075.4	Cambisol	4.27
161	378789	2244.66	14.49706851	19.90593898	5.472571405	0.190023075	104.5550925	5506.211429	8.331842828	22.72110653	5.755208588	0.059903852	132.088084	7750.871429	10.11729826	21.90583123	5.65291783	0.097586507	124.1145025	760580	190720	983	SW	7.2	1019	Luvisol	4.47
162	378790	1549.3	32.65182502	20	7.643287956	0	220.6836437	822.1	20.77737319	20	7.753679145	0	187.2216355	2371.4	28.53527494	20	7.678468176	0	209.0832739	760860	190320	1048	SW	8.1	1009.5	Cambisol	4.22
163	378791	1064.275	53.05471178	20.63377182	7.221682995	0	254.7225057	4734.525	16.53254754	18.9086619	7.270801339	0	140.5020517	5798.8	23.23559409	19.22527764	7.261360274	0	161.4653499	751625	184575	1340	WNW	4.3	1132	Phaeozem	4.35
164	307068	1975.5	28.77987497	11.44083523	4.122699781	16.29477539	64.43053581	2652.2	15.49223513	5.597062816	4.428014603	8.920742832	25.62295665	4627.7	21.16454156	8.091687015	4.271056462	12.06861355	42.18936602	733500	126750	380	E	10.9	1585.1	Cambisol	6.2
165	378792	622.9842105	51.98904264	7.570361672	4.389125703	15.57046356	63.76580569	839.5157895	46.45884545	6.853670035	4.444512249	16.40976362	52.23874322	1462.5	48.81455521	7.158960684	4.420050653	16.0522452	57.14895034	730650	123750	527	NE	9.7	1597.1	Umbrisol	4.55
166	378793	1000.766667	49.62366552	11.4719948	4.853969604	5.597251817	122.0592101	2464.533333	10.99752083	8.881896505	4.690802588	8.631419847	27.39672728	3465.3	22.15261796	9.629907944	4.731975936	7.755162604	54.73492523	733860	128720	468	ESE	10.1	1543.7	Cambisol	5.79
167	378794	1316.666667	48.53204278	3.444118987	4.323997879	18.22874997	26.39054063	3221.233333	15.12592071	4.034999017	4.52714806	12.90252634	16.69309858	4537.9	24.81867009	3.86355583	4.45783012	14.44792423	19.50680067	730850	123550	567	NE	8.9	1647	Cambisol	2.76
168	378795	2529.4	12.89122242	2.148904879	5.229349964	0.518661184	59.92535298	4461.7	1.523087949	1.088627653	6.323649513	0	27.80907023	6991.1	5.636111556	1.47223899	5.61322492	0.187653102	39.4288333	728400	121125	280		11.5	1637.4	Regosol	4.96
169	378796	1425.1	63.9942818	7.414942811	3.390105632	62.14290779	79.69066207	4279.9	17.56154022	1.912161499	4.589793111	10.81444336	12.09250587	5705	29.16036582	3.28674759	3.917105028	23.6362128	28.97841865	737550	131175	1395	NNE	4.8	1687	Podzol	4.57
170	378797	1276.66	54.34163614	8.5	3.846060404	32.33912488	51.82548194	782.64	42.09597874	8.5	3.96152311	32.74651046	41.62523682	2059.3	49.687656	8.5	3.886411024	32.49395237	47.94886375	738190	132450	1215	NE	7.5	1609.4	Cambisol	4.91
171	378798	257.9884615	61.52994693	8.5	5.341301152	0.485316125	187.6997493	659.7115385	34.95763271	8.5	5.288267322	0.393278417	141.0807883	917.7	42.42777596	8.5	5.302533879	0.419152523	154.1865462	738040	131390	1381	WNW	5.6	1666.4	Leptosol	4.36
172	378799	156.45	103.4604219	8.909923298	3.02890712	61.90457191	117.7289243	709.05	44.37254495	9.009614978	3.475417617	61.56874633	83.49919433	865.5	55.05342114	8.991594454	3.353326791	61.62945102	89.68664811	738120	130680	1269	NE	6	1659.7	Podzol	4.86
173	378800	1080.668966	41.92062216	4.550496181	4.238235378	21.97578023	43.37426358	2463.764368	23.06709671	2.148414327	4.407550923	14.67741383	21.52770744	3544.433333	28.81538365	2.880789595	4.348606603	16.90262653	28.18854516	737500	131870	1132	NE	6.1	1652.4	Cambisol	4.13
174	378801	340.55	45.72425929	8.891418294	4.452174916	18.30172196	54.38492434	682.1	12.82790353	3.501997508	4.719039816	12.79073065	15.86922249	1022.65	23.78263287	5.296714418	4.610941408	14.62593144	28.69523556	737580	137750	737	SE	8.8	1512.6	Leptosol	5.85
175	378802	1231.169231	68.19724215	6.411684015	3.628934633	33.37748243	62.86064268	2385.630769	21.54884926	4.446990314	4.205668686	14.04386351	17.75352047	3616.8	37.42809777	5.115777759	3.916955226	20.62508358	33.10811596	732680	122810	411	NNW	9.4	1609.2	Cambisol	5.28
176	378803	1320.533333	17.43891635	4.058418316	6.309553959	0.228615549	99.7191474	3234.666667	13.63323604	4.391439613	6.781531458	0.13599898	128.4933292	4555.2	14.73648676	4.294898138	6.585755796	0.162848134	120.1518149	727820	121010	283	NNW	11.5	1636.7	Phaeozem	6.23
177	378804	1300.163636	65.80040946	5.018799382	4.088692362	21.08458713	28.96866173	4613.3311	16.55679249	1.539951723	4.67800488	8.030851963	10.3226137	5913.494737	27.38368301	2.304824514	4.464712224	10.90089625	14.42220535	727500	127950	1790	ENE	3.5	1845.5	Podzol	3.16
178	378805	1090.155556	28.06834101	6.155062988	3.324886802	37.29736778	53.51467714	1734.594444	27.96439466	5.218785531	3.975703956	24.71832154	30.94266733	2824.75	28.00451066	5.58012302	3.606264998	29.57295191	39.65388138	727500	128740	1614	NNE	4.3	1696.6	Podzol	3.13
179	378806	1339.3	120.6343351	8.5	3.390100768	59.6498676	98.66745354	3749.2	36.41280433	6.600128027	4.169098759	22.77651858	26.8679976	5088.5	58.58002378	7.100176869	3.803781407	32.48163332	45.76571035	729880	117920	1720	NE	4.3	1689.5	Umbrisol	3.14
180	378807	614.5	105.8224752	7.881611066	3.200825202	58.32491715	95.24875977	813.425	67.07550081	8.5	4.530424887	13.8046414	16.90407636	1427.925	83.75005708	8.233879581	3.54089562	32.96370749	50.61929807	730230	117600	1742	N	3.7	1668.3	Podzol	2.29
181	378808	1530.46	66.30364779	8.5	4.003376043	32.9578939	47.37170935	4938.065	24.35789488	8.5	4.432221934	14.76240911	17.24719679	6468.525	34.28230532	8.5	4.286550488	19.06748046	24.37468899	729650	119760	1125	NNE	7	1735.5	Umbrisol	5.16
182	378809	1598.1	63.31258463	15	7.386444862	0.079630686	298.8266888	1965.25	13.79760336	13.06761226	7.685850205	0	138.3540367	3563.35	36.00420433	13.93425428	7.525942303	0.035712967	210.3232077	808220	172950	1798	E	2.3	869.9	Phaeozem	2.65
183	378810	150.2	80.21434754	8.5	3.872409693	69.83519574	149.986782	27	76.8	8.5	3.91	76.24	150.3328	177.2	79.69410271	8.5	3.877931411	70.81109707	150.0395049	799850	170580	1779	WSW	1.9	848.3	Leptosol	2.45
184	378811	1743.525	50.03205023	27.82166373	6.485589647	0.056818285	289.2656863	6790.875	4.873343218	16.9286342	7.539624632	0	154.5712851	8534.4	14.09898704	19.15401258	7.046959729	0.011607623	182.0885161	800700	171550	1795	NW	1.6	867.2	Cambisol	3.53
185	378812	895.19	49.25713128	14.76263698	7.362114497	0.185718294	231.862995	NA	NA	NA	NA	NA	NA	7169.812903	9.134814084	9.28192417	7.653352849	0.023187936	144.0885608	807950	173420	1866	NE	1.4	885.3	Cambisol	2.9
186	378813	928.84	18.4991056	19.06166832	7.241143842	0	215.270044	143.06	9.923534181	23.5	7.187915987	0	259.5414101	1071.9	17.35457603	19.65402556	7.233651167	0	221.1786751	808075	172950	1855	SSW	2	868.8	Regosol	2.74
187	378814	319.8363636	74.86160281	5.229625945	7.477532174	0.205449184	360.7882365	738.6545455	31.345	1.5	7.61	0	219.575	1058.490909	44.49408978	2.626953467	7.565551852	0.062079059	262.2443585	801480	172025	1762	SSW	2.5	840.5	Phaeozem	2.67
188	378815	1408.8	39.21890068	23.5	7.303213332	0.031745159	327.9464739	2359.6	11.05211985	18.41282421	7.56608957	0	221.6646146	3768.4	21.58214873	20.31464282	7.44849948	0.01186779	261.3976269	801100	172080	1639	S	3	828	Cambisol	3.43
189	378816	1300.1	88.78374894	23.5	7.082202277	0.261419383	411.4202016	5644.15	8.204843865	15	7.700858689	0	150.193312	6944.25	23.29079764	16.59136696	7.499234665	0.048942843	199.1001168	800790	171960	1616	N	3	821.7	Phaeozem	3.55
190	378817	1872.466667	31.21022502	19.69108484	6.80021732	0.15908575	217.4528792	2349.333333	10.90983414	5.553618048	7.480671977	0.030572123	161.4160689	4221.8	19.91353048	11.82391397	7.052288311	0.087570911	186.2696999	800150	171550	1622	NNW	2.4	850.2	Regosol	4.04
191	378818	1263.225	21.41716697	8.5	3.133304053	40.86467316	65.1651695	4027.075	6.656950082	4.5415438	3.875397878	12.38595794	18.61738278	5290.3	10.18141466	5.486749334	3.557384352	19.18614414	29.73212634	822150	177675	1990	WSW	0.6	893.8	Podzol	3.24
192	378819	1982.907143	33.44277761	15	7.246811135	0.055775582	246.5179038	7049.342857	17.12290767	15	7.61649037	0	192.2266963	9032.25	20.70571225	15	7.504312128	0.012244767	204.1455895	829640	197300	1350	SE	6.2	737	Calcisol	3.83
193	378820	1323.565217	82.09575823	20	5.939711511	0.375296444	310.2376766	4216.534783	11.50999776	15.95153346	7.695391494	0	197.8611842	5540.1	28.37338604	16.91873793	6.537854703	0.089660714	224.7086448	829680	197320	1346	S	6.2	737	Calcisol	3.38
194	378821	1197.26	37.2158111	20	6.711454351	0.047230242	232.3217631	1284.497143	11.12959051	20	7.669798566	0	169.5432778	2481.757143	23.71421772	20	6.979549734	0.022785018	199.8291458	829900	197250	1230	E	6.6	765.3	Calcisol	4.43
195	378822	998.1	36.57558461	8.5	3.042984871	27.95352371	60.99733507	2317.2	22.00801657	3.5	3.200924586	33.37967929	50.6799502	3315.3	26.39371007	5.005293639	3.147061272	31.74608779	53.78608896	821350	177720	1862	N	1.2	861.5	Cambisol	2.81
196	378823	3205.2	16.41441829	8.559632784	7.705267818	0	166.4327025	8213.9	2.625959256	3.755328163	7.783066402	0	129.1347535	11419.1	6.496209003	5.103836992	7.759786412	0	139.6038261	827500	193220	1074		6.8	706.5	Fluvisol	4.44
197	378824	1938.4	25.26178936	8.495731015	7.420791147	0.117045682	168.6272352	4653.028571	3.204525962	5.029021958	7.756151666	0	109.6892654	6591.428571	9.691101506	6.048507911	7.628250583	0.034420664	127.0216782	822960	189060	1107		6.6	700.4	Regosol	3.72
198	378825	1661.7	32.11848077	30.23185593	7.435421569	0.029617079	256.0368885	4267.5	13.34921793	27.95407733	7.676677105	0	202.8419291	5929.2	18.60943584	28.5924408	7.594544059	0.008300395	217.7501906	823290	191580	1428	SW	5.7	734.5	Calcisol	3.51
199	378826	111.7222222	163.1304674	14.85330681	5.866317085	0.682760269	438.1131874	1986.177778	13.73244982	20	4.429819	14.40955532	85.04466436	2097.9	21.68853854	19.72591639	4.45269244	13.67854428	103.8470858	826350	191590	1189	SE	6.7	711.3	Umbrisol	4.3
200	378827	1100.3	67.51566391	8.576179224	3.949971554	36.8143193	50.91787642	3581.866667	14.58937044	3.039830721	4.487896476	13.65933286	17.04080061	4682.166667	27.02694579	4.340861781	4.290356029	19.10070934	25.0018471	730190	122660	514	S	10.4	1615.1	Cambisol	4.48
201	378828	1522.15	55.26350097	12.38641231	3.920479891	34.20623393	50.53938781	2817.25	15.27486343	6.459365516	4.422731327	15.62876348	20.95036392	4339.4	29.30184979	8.53842121	4.176174442	22.14526268	31.32943308	734360	128150	420	SW	10.7	1563	Cambisol	5.89
202	378829	2447.6	46.53471351	23.94828199	7.248280104	0.081354265	279.0674382	7088.557143	1.801221809	15.91719844	7.771906159	0	161.3765868	9536.157143	13.2827539	17.97849838	7.567688743	0.020880812	191.5837366	558580	169900	739		7.9	1284.1	Cambisol	5.49
203	378830	2339.85	21.072198	8.018805693	3.917968693	20.58712108	41.22342512	9881.125	2.899205961	11.41476515	4.212303887	15.26007371	53.16518592	12220.975	6.37863992	10.7645686	4.138364168	16.27999984	50.87879478	614360	216520	569	SE	9	1153.7	Cambisol	5.9
204	378831	2048.89	26.56552834	16.30449683	3.924199075	39.41729056	48.69262812	9340.428391	7.135492913	17.30973278	3.935357709	55.76234839	77.85813738	11389.31839	10.63087375	17.1288951	3.933329053	52.82194191	72.61138615	616210	216620	580	S	8.9	1170.4	Cambisol	6.38
205	378832	4070.85	14.04246803	18.99634229	3.80878163	43.73271384	58.42468558	8552.05	4.746529546	21.66973123	3.94469209	42.20956856	76.14653119	12622.9	7.744443749	20.80757076	3.896055873	42.70077866	70.43128547	610800	221540	470		9.2	1163.5	Cambisol	3.7
206	378833	3517.7	20.58892515	27.25853399	3.608964399	88.42970564	113.3465014	13651.45	9.287242812	24.58610752	4.039416618	41.65386447	154.1088341	17169.15	11.60278714	25.13364741	3.910002437	51.23752915	145.7572466	609540	223180	460		9.2	1192.3	Planosol	4.44
207	378834	3665.05	13.56196177	15.49383228	3.890093841	29.26289107	41.35917739	11174.75	0.784474373	15.80351686	3.902706502	40.79529463	66.85936226	14839.8	3.940186054	15.72703271	3.89955727	37.94708673	60.5614706	584040	215740	500	NW	9.5	1084.6	Luvisol	5.18
208	378835	3305.1	21.64118181	8.5	5.060985726	0.840242607	73.8086034	11324.1	3.968380534	15	5.252632279	0.27085188	65.80293505	14629.2	7.961105734	13.53148839	5.201356054	0.399491401	67.61161457	575760	208100	558		9.3	1036.9	Gleysol	3.36
209	378836	2965.418519	14.21832029	15	3.937108487	30.04370981	61.01894866	12888.78148	0.742185699	17.15009464	4.431525769	7.761734537	79.00202268	15854.2	3.262803521	16.7479343	4.286365291	11.92942399	75.63841299	575520	207900	554	NW	9.5	1025.4	Luvisol	5.2
210	378837	2420.566667	17.3836004	15	3.715484007	32.90526501	45.79452562	7293.933333	1.627038361	17.35366149	3.866442848	26.85334726	58.49514166	9714.5	5.553108549	16.76719852	3.823642921	28.36130654	55.33052301	578570	198220	560	SW	9.3	1073.5	Luvisol	5.03
211	378838	3302.716667	8.62786605	10.63275056	5.067901043	1.070581825	49.01038436	8197.597619	0.432147949	13.74580228	6.257463477	0.060693254	148.1315897	11500.31429	2.785834474	12.85178082	5.545125012	0.350718007	119.6654757	579880	198800	550	NE	9.3	1076.4	Luvisol	5.01
212	378839	2940.78254	15.44784947	8.5	3.814085586	21.43366524	30.88404797	9300.01746	0	8.5	4.285999399	10.23755937	21.52895151	12240.8	3.711257924	8.5	4.118121619	12.92736009	23.77646019	582480	195180	529	N	9.3	1061.4	Cambisol	5.01
213	378840	2703.6625	10.79960586	14.86123915	3.792680663	29.84399283	42.45197736	12104.1375	0.313309034	18.26701324	4.007898137	23.6361984	70.45297062	14807.8	2.227935615	17.6451745	3.959801704	24.7696403	65.34044645	628970	231140	502	SW	8.9	1184.4	Planosol	4.77
214	378841	3128	17.4599546	19.16242647	3.545960749	51.62655596	66.53500855	12060.73636	0	14.1858593	3.723282608	53.17156214	78.58547225	15188.73636	3.595739415	15.21074391	3.680373487	52.85338035	76.10377466	628700	231180	500		8.9	1175.8	Planosol	4.49
215	378842	3078.92	20.53028555	18.29755239	3.525119667	43.74086878	66.06801076	12450.24667	2.671361628	20.13091173	4.020739499	19.55590876	72.76282697	15529.16667	6.212195417	19.76741723	3.867712742	24.35098623	71.4354664	629290	231030	490	S	8.9	1173.6	Planosol	4.37
216	378843	3619.9	27.87702727	17.94859803	3.521976472	58.52576166	77.6504106	12636.88	3.348287235	18.18404701	3.792248928	46.30269013	86.6322959	16256.78	8.810105999	18.13161955	3.715892054	49.02440357	84.63229796	629220	230480	488	NW	8.9	1174.5	Planosol	3.55
217	378844	3165.68	12.73725102	16.61271828	3.64515654	48.57072975	65.44521698	12467.45333	0.584327449	18.6946575	3.722804549	74.861991	130.3061619	15633.13333	3.045271539	18.27306874	3.705920209	69.53806021	117.1719429	629160	230260	492	NW	8.9	1185.7	Luvisol	4.26
218	378845	1861.63	33.21156422	12.81309847	3.53676569	56.40240082	77.01016101	4672.631111	8.130680794	8.192130891	4.197463849	31.32421387	35.57520253	6534.261111	15.27629745	9.508657997	3.892230788	38.46906229	47.38014274	619300	198170	1036	NNE	6.9	1590.2	Cambisol	2.49
219	378846	1298.1	19.64022726	15	4.329542637	19.14370205	65.76181669	4121.111111	3.781877919	15	5.289287733	0.898874818	111.4776711	5419.211111	7.580534744	15	4.820382058	5.269180706	100.5270457	619420	198040	1076	NW	6.5	1562.7	Cambisol	3.32
220	378847	1799.918182	23.58758595	20.29851231	3.559297745	106.023054	135.8432568	5784.490909	4.798933119	22.30404766	4.110516131	84.57225755	141.4858321	7584.409091	9.257822063	21.82809765	3.904477526	89.66292157	140.1467464	619440	197840	1090	SSE	6.5	1557.4	Luvisol	4.41
221	378848	1987.531579	27.85856924	13.38606338	3.487855409	59.57525253	82.22760963	5592.101754	4.508340692	13.73357693	3.948015313	69.28745107	83.4407463	7579.633333	10.63123801	13.64245192	3.773574823	66.74071821	83.12263758	619340	197970	1074	W	6.7	1543.3	Cambisol	4.11
222	378849	1830.475	39.58098085	20.53587115	6.290634191	0	211.1606145	1291.565	5.997316753	9.493540201	7.512234252	0	145.2257977	3122.04	25.68766587	15.96774	6.504491259	0	183.8838654	606340	190220	827	NE	7.8	1277.1	Kastanozem	4.03
223	378850	1260.925	62.43291453	11.55723477	7.165212283	0.220872582	258.3944122	3921.875	0.321550598	4.649001753	7.551843981	0.143447925	112.1793094	5182.8	15.43264336	6.32970788	7.4217346	0.162284593	147.7520265	607040	192840	520		9.2	1131	Cambisol	5.38
224	378851	2655.7	18.0838246	12.92389389	3.671248446	41.02067417	56.40814055	8386.2	1.195880375	18.87310045	3.977836874	15.31021872	94.33571827	11041.9	5.25761916	17.44224998	3.882072406	21.49386977	85.21371316	618040	226140	474	SE	9	1160.7	Luvisol	4.93
225	378852	3042.95	16.89187811	8.5	4.088156732	17.57188743	67.970252	10338.86429	3.136639345	14.92112597	4.405244135	5.53197494	71.3140883	13381.81429	6.264503991	13.46099771	4.310240751	8.269783949	70.55371856	617920	226180	480		9	1161.4	Planosol	5.4
226	378853	3777.266667	13.55692679	8.5	3.643628442	41.23221694	54.02099589	11495.53333	1.483892468	8.5	4.244985657	8.337221868	69.49998633	15272.8	4.469793555	8.5	4.004346564	16.47280725	65.67172467	617640	226040	490		9	1163.9	Stagnosol	5.24
227	378854	2855.866667	23.40765442	8.5	4.683370358	3.778914662	135.3258761	9303.233333	4.349054522	12.60217057	5.487145446	0.023811992	85.37744794	12159.1	8.825440123	11.63867392	5.133032541	0.905791131	97.10907701	617710	226080	490		9	1163.4	Cambisol	6.29
228	378855	2157.1	29.16901887	20	6.200946151	0.25019847	175.6855149	7338.7	2.131378567	23.04849633	7.620202121	0.151508007	151.9133415	9495.8	8.273345952	22.35598896	6.791695609	0.173926887	157.3135137	586280	209040	480	NW	9.5	1052.5	Cambisol	4.52
229	378856	3134.1	12.05499713	15.70067962	4.036256478	24.77080528	36.81221786	11410.5	1.598014197	18.53275623	4.067064136	25.74790669	50.00546529	14544.6	3.851306155	17.9224946	4.060238434	25.53735889	47.16255749	603600	224280	550	SE	9	1181.6	Luvisol	4.14
230	378857	2594.533333	19.22280988	8.5	3.982069944	29.89951298	38.12460873	5540.84902	2.683308621	12.87826404	4.038373408	33.31169428	81.52721761	8135.382353	7.958080657	11.48194958	4.019612324	32.2234826	67.68527256	602240	222840	543	W	9	1166.6	Luvisol	4.6
231	378858	3126.54	24.11550725	8.5	3.566068196	41.24302088	59.62309393	13104.68857	1.088865494	9.972839274	3.754115218	37.38466964	69.10721558	16231.22857	5.52437179	9.689133645	3.710997789	38.12788445	67.28033689	593940	219340	590	SE	9	1159.8	Cambisol	5.17
232	378859	3304.45	24.90823608	28.30931623	7.535128688	0.088310415	242.1790265	12104.525	8.432160429	16.34509977	7.658071156	0	180.6916356	15408.975	11.96544984	18.91082235	7.628617598	0.018938142	193.8775879	592060	219840	430		9.5	1103.7	Phaeozem	5.43
233	378860	3528.8	37.38273858	28.86753146	7.442783648	0.145577375	274.6109229	12161.64	6.570983704	14.44624319	7.630128778	0.129528439	178.1265333	15690.44	13.50058674	17.68960934	7.580404367	0.133137865	199.8259958	592020	219900	430		9.5	1103.9	Stagnosol	5.11
234	378861	2218.76	31.23333826	20	4.563548401	11.18119498	101.8735082	11031.915	4.028839363	20	4.470872381	8.264232609	87.86963246	13250.675	8.584098169	20	4.485076294	8.752663533	90.21451221	605600	192400	592	NW	8.9	1153.6	Cambisol	4.13
235	378862	2873.333333	22.81442529	21.45551566	3.766366667	98.58736372	121.7046189	6367.066667	4.260674931	14.71281228	4.301369183	48.28555269	104.9318555	9240.4	10.03002576	16.80947849	4.057116626	63.92706933	110.1474025	630550	192525	1165	ENE	6	1617.5	Cambisol	4.14
236	378863	2691.45	23.12158508	16.92371491	3.917973838	44.14978205	61.96221676	6136.896154	5.02486816	10.77898383	4.180657007	47.89999212	59.11298599	8828.346154	10.54191608	12.65229466	4.082589558	46.75668592	59.98161552	630275	192575	1200	W	6.2	1613.1	Cambisol	3.33
237	378864	2043.871429	27.94665982	8.5	3.879769805	22.43484639	45.45270971	8889.614286	4.300277207	18.55312299	4.305992251	9.636470061	64.59980709	10933.48571	8.720657593	16.6738238	4.188107167	12.02895828	61.02050893	605850	192125	765	NW	8.4	1196.9	Luvisol	5.45
238	378865	3300.4	23.56156489	27.22857835	4.728429371	5.420648809	145.183143	10175.13333	2.849285028	14.38081155	5.412789568	0.572133977	130.7027972	13475.53333	7.922094152	17.52746026	5.125175607	1.759622291	134.2492938	621575	228000	470		9	1150.8	Gleysol	4.36
239	378866	2792.833333	23.09086861	16.070848	3.780145643	47.33724549	59.10075495	11475.78333	0.754590174	13.00712086	3.828687456	45.03004809	55.69361663	14268.61667	5.126527862	13.60679212	3.818749487	45.48164182	56.36050465	621600	227880	474	W	9	1150.7	Cambisol	4.17
240	378867	2766.8	19.19795787	13.16341803	3.722922355	34.15005245	44.51832892	10463.5	1.442333539	7.80574282	3.90774325	34.91367594	48.88718316	13230.3	5.155496612	8.92617212	3.8620557	34.7539824	47.97354206	619460	213100	828	NW	7.8	1400.7	Cambisol	3.47
241	378868	2137	41.31586269	5.419450164	3.499868025	51.88534292	69.26484453	8879.142857	1.690665741	2.086488722	4.10760492	24.16849599	29.31739152	11016.14286	9.377480172	2.733043391	3.905614498	29.5452329	37.06671977	629380	217740	627		8.8	1270.8	Cambisol	4.19
242	378869	2348.817391	32.61447047	8.381244493	3.719713957	45.19154002	58.16951193	8048.002609	1.656112537	2.592816527	4.160660774	23.20998273	25.95385008	10396.82	8.65012893	3.900520255	4.015256773	28.17598811	33.23191268	629440	217780	622		8.8	1271.1	Cambisol	4.85
243	378870	2998.5	21.52546163	8.368600967	3.640636586	49.44967365	62.53076502	10054.1	0.939156682	7.858669597	4.025399331	29.82557565	42.19040148	13052.6	5.668332125	7.975813248	3.902390118	34.33370873	46.8630782	628540	218020	750	NW	8.5	1350.4	Cambisol	4.6
244	378871	2177.711111	13.5421342	12.08770345	3.815962052	35.85809063	65.86904212	6034.155556	5.998883283	16.04064529	4.030134886	28.5731404	87.03384949	8211.866667	7.999283679	14.99236166	3.962301565	30.50504184	81.42113827	631560	212090	917	NW	7.1	1666.3	Luvisol	4.67
245	378872	2575.025	18.9021458	15.77005612	3.700027403	50.20818855	71.01969803	7980.025	2.732034549	14.94193298	3.990680477	62.42544279	71.81201194	10555.05	6.676917873	15.14396308	3.899914235	59.44490408	71.61871791	631080	211230	999	W	7	1713.6	Cambisol	3.78
246	378873	2876.1	28.75887278	18.07074684	3.592722316	66.42636766	86.67811477	8495.06	4.47542746	14.84800225	4.034996006	57.51644458	63.65777274	11371.16	10.61742327	15.66312892	3.874421672	59.77002555	69.48029267	631100	211340	1000	WSW	7	1714.4	Cambisol	4.09
247	378874	1893.5	36.69675733	12.67740692	3.156864651	84.1677658	115.0577512	4338.066667	7.700721596	19.74205291	4.061987864	45.11506947	132.7535317	6231.566667	16.51134605	17.59541662	3.565279522	56.98147232	127.3765595	631260	211650	993	SW	7.1	1701.8	Cambisol	3.57
248	378875	2496.8	33.35810598	16.60660846	3.527813111	69.51838185	88.2396932	9499.733333	3.022403576	15.75865568	4.017721259	52.15323664	64.08449402	11996.53333	9.336076005	15.93513737	3.860896455	55.76738861	69.11183814	630710	211460	977	ESE	6.8	1596.6	Cambisol	3.57
249	378876	2651.14	21.03869583	16.91170968	3.725394094	55.45959057	71.78034448	7930.66	5.144198263	14.3037843	4.035411107	58.75595827	65.62323903	10581.8	9.126369377	14.95716797	3.934690963	57.93009383	67.16582616	630840	211560	970	ENE	6.8	1596.9	Cambisol	4.59
250	378877	2913.170588	8.240114187	10.71088646	4.754136425	2.161390188	57.44249327	11731.62941	2.920210953	13.92820041	4.701867241	2.59563597	102.8099655	14644.8	3.978455902	13.28820639	4.71177557	2.509254999	93.78538435	550590	184830	545	WNW	9.5	966.2	Luvisol	4.34
251	378878	2691.325	20.03759013	20	7.278887922	0	204.7526936	7757.295	1.662503023	20	7.760431297	0	164.475024	10448.62	6.395504252	20	7.577713561	0	174.8496284	553200	167080	726	SE	8.1	1216.5	Phaeozem	4.21
252	378879	3609.1	12.10063566	8.5	3.809644444	35.70602682	72.11467251	13885.75714	0.325278557	17.44142868	5.047054775	2.472918399	196.9881748	17494.85714	2.754474805	15.59685744	4.407828712	9.328739549	171.2274067	584900	215360	548		9.2	1111	Planosol	4.66
253	379405	2148.3	25.67024185	15	7.50157879	0	224.5074748	612.7	15.6178	15	7.61	0	206.7501	2761	23.43948085	15	7.523410227	0	220.566894	621490	205390	713	SSW	8.3	1325.1	Phaeozem	4.02
254	378880	2758.55	21.93214011	20	6.869781484	0	200.2281284	6806.05	12.17807389	20	7.474729037	0	201.0611328	9564.6	14.99126831	20	7.202206692	0	200.820884	621490	205380	711	S	8.3	1325.2	Calcisol	3.97
255	378881	2789.627273	33.58722646	10.83446958	3.471211872	54.770131	74.138729	6955.572727	3.597839586	8.055866192	4.162745181	31.73601001	38.11680806	9745.2	12.18249783	8.851259594	3.836260605	38.32967788	48.42831866	624300	193240	957	N	7.2	1562.8	Cambisol	4.39
256	378882	3091.54	17.23625672	15.98633367	3.895788154	35.67179153	64.90416713	9660.79	0.823608598	18.37775793	3.850978651	19.02548053	88.66400315	12752.33	4.802517407	17.79800633	3.861424793	23.0610361	82.90391982	624600	193240	922	NNE	7.1	1558.5	Gleysol	4.54
257	378883	2559.414286	40.15662342	12.5538064	3.548858556	49.04119278	65.50404942	4108.685714	9.907861091	5.07512378	4.472432059	15.14785894	18.15535615	6668.1	21.51823203	7.945663682	3.88865494	28.15712437	36.32918707	624210	192740	1033	E	6.8	1635	Cambisol	4
258	378884	3052.64	54.81470047	8.5	3.572592266	66.95015024	84.8600627	6366.96	11.65932342	10.93299785	4.340064564	23.56365681	27.92321525	9419.6	25.64482495	10.14452843	3.929601673	37.62405697	46.37492212	624140	192720	1047		6.8	1634	Cambisol	4.26
259	378885	1995.452174	36.66225757	8.5	3.552463537	51.51741403	73.1914437	5153.107826	4.564243767	12.72014263	4.192852457	43.63932689	50.00280851	7148.56	13.52409742	11.54213016	3.904951468	45.83841959	56.47569431	622900	184040	920	NNW	7.3	1270.3	Podzol	4.33
260	378886	3078.75	17.09922785	22.02871295	3.807949857	60.23755992	83.29949556	9749.675	3.492805929	27.05844054	4.543233907	16.18074317	163.2840245	12828.425	6.758270823	25.85133415	4.228391899	26.75413192	144.0881865	622640	183640	930	N	7.4	1257.2	Stagnosol	4.68
261	378887	3150.461111	12.94078366	28.73783891	4.068759047	27.4580394	134.1817946	10794.93889	2.006497011	28.73033459	4.966291865	2.402391796	164.767269	13945.4	4.476705457	28.73202992	4.558320153	8.062813396	157.8575821	622610	183660	930	NE	7.3	1266.9	Gleysol	4.63
262	378888	3013.1	45.2048719	8.5	3.475874876	71.90020916	92.77425251	12078.3	1.999500253	17.62536946	3.91260601	85.49269596	96.43693657	15091.4	10.62574469	15.80342778	3.783522188	82.77886411	95.70565695	622640	183760	920		7.4	1258.3	Podzol	4.45
263	378889	3251.957143	23.68728962	26.49217043	3.397643028	103.4849425	126.592757	12079.52063	5.000560021	25.03540847	3.554386919	70.46084829	92.96124257	15331.47778	8.964199057	25.344402	3.516087894	77.46558329	100.0948174	572360	161840	750		8.1	1331.8	Cambisol	4.45
264	378890	3085.971429	18.86371645	20.62343277	3.978259922	22.73739204	72.64088538	11258.86857	7.230184911	27.53056577	4.60236267	4.152195428	114.0029411	14344.84	9.732878977	26.04465062	4.374428233	8.150384724	105.1048201	572440	161640	740	SSE	8.2	1314.4	Stagnosol	5.66
265	378891	2961.7	20.51316632	27.35879225	4.4466147	8.18149712	109.4105937	12112.33333	5.712455245	21.73040345	5.48445925	0.458437555	124.8713319	15074.03333	8.620453723	22.83625208	5.015051964	1.975840695	121.8336533	572800	161940	730	W	8.3	1298.7	Gleysol	5.59
266	378892	2839.1	25.641043	19.75412983	3.766984909	50.64649642	69.69267577	12013.2	3.054880922	35.92824976	4.08455479	29.89550704	72.13677658	14852.3	7.372351801	32.83647651	4.003208736	33.86217442	71.66957307	562720	163030	860	NW	7.3	1511.2	Planosol	4.42
267	378893	3088.433333	23.53885468	19.0582728	7.228215688	0	210.4659246	13368.26667	0.282471963	33.08971694	7.708315015	0	242.6620027	16456.7	4.647003589	30.45643203	7.568683194	0	236.6197561	566480	165600	950	WSW	7	1595.2	Planosol	4.75
268	378894	3112.396296	17.37332427	21.05939725	4.449091039	10.18087083	110.9456458	11241.7037	3.358821081	16.67977559	5.470419078	0.399889913	164.9197779	14354.1	6.397582677	17.62940797	4.98461104	2.520697819	153.2165789	566520	165500	949	WSW	7	1595.4	Cambisol	5.5
269	378895	2688.7	23.77408934	19.4893071	3.832163977	44.05247173	55.2774764	11559.76667	3.138032803	17.59758703	4.139226649	24.84363983	52.6971757	14248.46667	7.03207744	17.95455651	4.062229603	28.46836574	53.18408104	601540	186690	907	N	7.4	1307.8	Cambisol	3.8
270	378896	2838.42	28.44114987	35	4.209966403	15.86620826	87.97953775	9172.98	3.476302065	41.26699284	5.071956157	1.87505341	162.705019	12011.4	9.375757857	39.7860366	4.676897404	5.181310279	145.0466028	599140	183680	839	NW	7.8	1301	Cambisol	4.24
271	378897	2995.825641	14.58693309	22.85195126	3.708034472	78.64718576	111.5788089	12485.26527	1.029905456	42.43379039	3.730033339	126.2446306	189.4267516	15481.09091	3.653395703	38.64440784	3.725688368	117.0338039	174.3619952	599880	183000	985	WNW	7.2	1358.3	Planosol	3.94
272	378898	2750.02	29.12385466	11.05221162	3.699646768	32.71510376	48.76795919	5863.88	3.487807595	11.01946101	4.150570797	21.11259855	36.60801835	8613.9	11.67221212	11.02991676	3.951242981	24.81674201	40.49012523	590980	183280	890	W	7.5	1343.3	Cambisol	4.19
273	378899	3306.35	19.18658454	10.89163277	3.716514623	55.20057951	73.07531831	8648.9	2.731547926	12.44067743	3.826200338	37.38330676	60.86841179	11955.25	7.282361192	12.01227285	3.792993499	42.31086074	64.24436005	590260	182880	860	W	7.7	1319.3	Planosol	4.24
274	378900	2778.538462	32.35215302	8.5	3.665958332	63.05532242	79.44819816	11782.26154	2.544388328	15.85702562	3.999530878	36.60466227	55.10747347	14560.8	8.232401393	14.45313444	3.91298618	41.6520619	59.75224847	590800	182880	890	S	7.5	1344.1	Planosol	4.49
275	378901	3270	20.82859253	38.74161009	5.793760505	0	162.2615405	5445.9	1.235121835	43.40450063	7.503762394	0	222.178693	8715.9	8.586129669	41.65509414	6.205646363	0	199.6991913	588870	203980	541	SW	9.3	1056.4	Gleysol	5
276	378902	2861.35	14.12948861	15	3.985181609	25.6513578	51.36016021	11490.43462	1.953462918	20.13250386	4.375964475	9.210929664	78.28659482	14351.78462	4.3810266	19.10922415	4.265067894	12.48869757	72.91820645	588900	203740	553	W	8.9	1107.6	Luvisol	5.68
277	378903	3315.733333	19.37940579	6.382422692	3.716693823	32.5296994	44.96879038	10995.91667	1.026494762	9.111469636	4.136220972	21.52766864	37.99957742	14311.65	5.278510349	8.479202084	3.997274878	24.07662702	39.61420967	588040	199160	663	NW	8.6	1133.5	Cambisol	4.26
278	378904	3503.3	19.79282383	8.5	3.946232256	29.31809084	41.27788985	13757.78	2.185880757	14.10218291	4.187827355	18.30630623	46.26306963	17261.08	5.75937695	12.96516672	4.126736377	20.54125242	45.25128008	579890	196690	577		9.1	1092.1	Luvisol	5.27
279	378905	3534.363158	28.53747289	12.68645055	3.903252742	31.80526497	39.51820632	13369.12775	2.007556791	11.77323328	4.010018612	28.31857768	41.96326582	16903.49091	7.554716165	11.96417854	3.985421362	29.04761165	41.45202656	579940	196720	571		9.1	1092.2	Cambisol	3.47
280	378906	3044.92	18.0468519	20	4.053155982	26.73048436	36.59821116	12422.58	0.954401888	17.92933513	4.162825378	30.81007788	58.57816615	15467.5	4.319208281	18.3369646	4.138934665	30.00697228	54.25120933	579700	195880	590		9.1	1096.6	Luvisol	3.06
281	378907	3418.077778	11.77218708	8.5	3.706108148	50.18197693	65.34346066	11992.65079	1.240530902	10.85747713	4.091059783	19.75974338	60.02147651	15410.72857	3.57643733	10.33459204	3.971685052	26.50735171	61.20188506	554710	181320	720		8.1	1106	Luvisol	3.75
282	378908	3411.358333	14.82032424	23.5	4.9640737	0.676282834	100.7518174	11758.04167	1.899067532	18.65130141	6.019098967	0.017695591	130.7132752	15169.4	4.804853967	19.7416971	5.496951634	0.165801454	123.9754168	553580	180970	650	NNW	8.6	1045.7	Luvisol	4.2
283	378909	3387	12.47561747	23.5	4.512885179	4.356165314	93.74526079	12306.62857	1.163785977	18.64465491	5.292622872	0.659504783	88.7543068	15693.62857	3.60510623	19.69253582	4.973758661	1.457318313	89.83145483	550560	184320	545	E	8.7	1022.1	Cambisol	4.44
284	378910	2897.0875	22.79176879	13.69243896	3.678625894	51.98732949	65.75066517	11598.76964	1.18019523	8.155369851	3.982432455	44.31537366	52.64692689	14495.85714	5.499403057	9.261987661	3.9023763	45.8486619	55.26579075	630310	222430	700	SSE	8.5	1315.9	Cambisol	3.98
285	378911	3251.01	27.28476089	14.7824676	3.553691313	40.95558924	55.90130758	12708.02333	1.190813181	13.64991067	4.095808933	25.17542162	34.55141507	15959.03333	6.506403616	13.88062351	3.917961058	28.38999494	38.90059541	630330	222490	700	ENE	8.5	1315.8	Stagnosol	3.98
286	378912	3178.891667	37.51540879	14.79389043	3.53596894	66.89076059	85.69605366	12574.00833	1.494741792	19.90782242	3.899880146	42.65605887	63.36950451	15752.9	8.763612803	18.87584508	3.797900984	47.54655467	67.8749404	630740	222660	672	ENE	8.7	1266.7	Planosol	4
287	378913	3090.168966	33.03411442	19.52774427	3.711147846	46.09020641	61.36553107	13051.7577	2.433271407	19.2671595	3.936816598	44.93564651	57.95840263	16141.92667	8.291418166	19.31704518	3.883567634	45.15667249	58.61065455	631020	222520	661		8.7	1260.2	Planosol	3.89
288	378914	3037.952174	20.84471442	14.77849431	3.599208326	44.37806354	63.31692007	11984.54783	2.283144673	20.79358435	3.968758664	33.93413232	79.31282965	15022.5	6.036791613	19.57717191	3.864494045	36.04617516	76.07802797	620920	227950	470	SSW	9	1156.9	Planosol	3.71
289	378915	3141.938462	22.18193374	20	3.701019213	42.89490418	57.43211662	12475.86154	2.522454672	21.64591038	4.124656313	23.44929243	67.08434824	15617.8	6.477485049	21.31479146	4.000014477	27.36129767	65.14254352	620980	228040	470		9	1157	Stagnosol	4.58
290	378916	2541	33.22148052	22.57676505	3.87453874	78.52835779	97.43109532	8475.266667	3.773001951	11.20552038	3.993604124	85.94772146	112.2711404	11016.26667	10.56555575	13.82839922	3.96310354	84.23637916	108.8481519	630880	199540	981	WSW	7	1785	Cambisol	4.44
291	378917	3188.95	34.12176704	22.05855376	3.634866104	94.12348169	115.4223875	9280.15	3.477722774	12.06028836	3.982133128	103.5306115	128.9602989	12469.1	11.31488223	14.61732683	3.863799268	101.1247549	125.4980023	630900	199600	985	SW	7	1785	Cambisol	4.27
292	378918	3081.370833	32.33055343	11.66738532	3.535222594	68.61462655	89.05727573	7824.929167	6.645015503	5.753589356	4.185744153	42.20495445	47.24516256	10906.3	13.90198326	7.424421665	3.888858344	49.66651275	59.05839216	631140	199370	991	NNE	6.9	1679.6	Cambisol	3.7
293	378919	3044.566667	36.41546178	26.58305178	7.767654761	0	246.0602327	7961.294872	9.778143558	13.63291172	7.877814386	0	157.0426182	11005.86154	17.14686166	17.21532683	7.844442959	0	181.6676838	615330	171480	610		8.7	1265.7	Kastanozem	4.73
294	378920	2031.8	29.18239418	34.98642337	4.645716461	11.86504094	182.9763138	1383.7	9.16971634	14.65590085	7.662823724	0	162.6581078	3415.5	21.07478407	26.75004685	4.871005548	7.058231647	174.744927	615600	171520	610		8.7	1264.4	Phaeozem	6.39
295	378921	2570.084211	25.35948111	14.805931	3.873745417	37.8496284	53.02338618	11014.79079	2.20847826	21.64903742	3.972719798	37.85226674	70.51011837	13584.875	6.588351236	20.35440941	3.952183022	37.8517676	67.2018528	601540	186720	901		7.4	1307.7	Luvisol	4.59
296	378922	2848.651515	36.79331189	14.76908372	3.599466729	55.99927001	84.59244067	9003.048485	6.171620582	22.5597949	4.142349274	21.92708646	43.46938397	11851.7	13.53179063	20.68723474	3.938608955	30.1166101	53.35364174	601720	186690	917	N	7.4	1307.5	Luvisol	3.79
297	378923	2715.6	41.97137097	16.68647813	3.532997271	71.78120541	95.44777811	9046.1	4.45034899	23.5	4.248358071	19.21797605	72.0036286	11761.7	13.11338982	21.92686006	3.954345783	31.3540368	77.41653085	601760	186320	950	NW	7.3	1317.6	Luvisol	4.45
298	378924	3002.2	37.75487309	23.5	4.122033978	19.73467	70.70657548	8942.533333	9.196716907	32.09983748	5.048499865	2.902862218	109.3779225	11944.73333	16.37454952	29.93834661	4.590530315	7.133383898	99.65823146	601720	186330	948		7.3	1317.7	Gleysol	2.5
299	378925	1628.133333	47.25450414	5.787161166	3.860890033	37.22655712	47.62599278	4935.166667	17.07082949	2.879780149	4.467595742	11.70862686	13.21077488	6563.3	24.558381	3.601003306	4.223350744	18.03876457	21.74802953	665820	174000	1200	NNE	5.4	1637.8	Cambisol	4.92
300	378926	941.9411765	68.38100056	8.873065634	4.708699502	2.527763006	142.2130515	1672.658824	9.492569949	5.070674903	5.77029432	0	35.72107317	2614.6	30.70783715	6.440532013	5.089839388	0.910657102	74.08609244	665500	174340	969	N	6.1	1669.3	Cambisol	4.18
301	378927	1840.65	40.08484639	19.09011219	4.343020238	10.24884528	132.8165762	5923.507143	10.14514158	14.7829599	6.810190477	0.058635973	141.5406383	7764.157143	17.24295228	15.8040572	4.963402566	2.474430556	139.4724234	668000	176120	1454	E	5.2	1687	Cambisol	4.3
302	378928	2083.485	24.47975274	15.70061376	3.981461353	29.80847901	53.11186607	4893.765	5.958801215	10.74149081	4.39055373	12.29537209	21.20956662	6977.25	11.48936479	12.22234046	4.224024346	17.52498197	30.73595056	671320	176990	1351	S	5.5	1651.8	Cambisol	3.42
303	378929	1983.785185	29.99689085	6.793219005	3.884690739	36.86403991	51.51533493	3461.614815	21.14150541	3.652109912	4.527529057	13.22143722	18.05327069	5445.4	24.36756455	4.796430933	4.177985346	21.83455012	30.24366025	665940	166700	1113	SW	5.7	1651.8	Umbrisol	3.73
304	378930	1770.766667	23.37173559	15	4.131323686	21.88405252	30.78234151	4485.133333	10.71904871	13.53105816	4.70408391	11.34173765	15.75029774	6255.9	14.30046084	13.94685017	4.454812033	14.32579746	20.00519984	665560	166740	1110	NNW	5.7	1663.9	Cambisol	4.02
305	378931	3199.08	17.39135933	19.31424284	3.852584703	36.03969547	77.63882755	12580.81459	1.320951682	8.300645829	4.473143321	5.966022206	62.61417265	15779.89459	4.578927797	10.53344769	4.25737851	12.06289986	65.66014185	566840	167810	990	S	6.8	1638.9	Stagnosol	3.72
306	378932	3557.757143	19.92376525	22.86682982	4.669982967	4.145326864	112.7971252	11306.64286	1.420704807	15.08123145	5.717320897	0.163873032	94.50040006	14864.4	5.849366271	16.94469504	5.182056561	1.116824096	98.87967569	566650	167870	999	S	6.8	1639.1	Gleysol	3.48
307	378933	3404.925	40.24	20.2	5.41	0.5111	149.2686	12997.475	5.821732144	8.122823856	6.301264996	0.044630647	124.5374124	16402.4	12.9665171	10.62988861	5.91951807	0.141463621	129.6712854	566390	167940	1000	SSW	6.7	1667.7	Gleysol	3.59
308	378934	3225.5	18.89392621	14.89823283	3.520057014	36.1900414	50.89430119	11159	1.514887355	19.32929474	4.266022017	12.95182608	69.45470168	14384.5	5.411866036	18.33569815	3.959582592	18.16263379	65.29282106	596800	210980	550		9.1	1086.8	Planosol	4.8
309	378935	2953.214286	30.64574943	14.7107897	3.653196113	40.91607373	54.35653347	9305.3	4.220697575	17.76610718	3.992878887	37.95912919	46.45172752	12258.51429	10.58679046	17.03004675	3.883718867	38.67149046	48.35608439	620380	227940	460		9	1148	Luvisol	4.39
310	378936	3172.910345	19.92085203	14.62838534	3.687674317	39.29461139	58.51969334	10198.88966	1.049271205	18.50165569	3.849948794	34.8808853	60.86007967	13371.8	5.527189962	17.58259172	3.805606409	35.92819061	60.30474411	613670	215380	590		8.9	1159.6	Luvisol	4.99
311	378937	2494.1	18.58978028	15	4.10898058	14.85405768	47.51882119	11419.775	1.475928466	14.20041879	4.222840349	6.59331278	57.16956707	13913.875	4.543633028	14.3437459	4.200110603	8.074073809	55.43964458	614650	216500	542	SSE	9.1	1127.8	Cambisol	5.08
312	378938	2489.05	18.92707559	11.62471626	3.928163368	17.60532529	55.28169942	10516.68333	2.428333949	23.17763363	4.579895016	3.453150797	161.7496618	13005.73333	5.585879305	20.96662498	4.357984988	6.16160783	141.3737188	617000	219700	557	S	8.9	1188.5	Luvisol	4.94
313	378939	2439.26	18.57933029	8.5	3.733234326	32.06949823	48.79390478	9287.3	1.677387486	12.16730374	3.895189709	25.95173022	57.92493628	11726.56	5.193186919	11.40446218	3.856167063	27.22429667	56.02557621	617080	219700	555	S	8.9	1188.8	Luvisol	4.81
314	344832	2612.8625	19.98941836	9.630065685	3.68996393	43.14225936	58.9166908	11928.4375	3.057008546	10.23274528	3.977848631	39.12515265	63.95781402	14541.3	6.099519094	10.12445242	3.910044862	39.84696896	63.05199667	609500	223300	460		9.2	1194.8	Luvisol	4.35
315	378940	3051.554545	15.53256951	8.5	4.092440652	10.84650447	27.20315679	12982.27045	5.323442259	10.83039071	4.230990454	6.631999118	29.65563824	16033.825	7.266441429	10.38687119	4.200990632	7.43410298	29.18888243	611800	209870	574		9	1135.9	Cambisol	5.19
316	378941	3156	21.65539068	8.5	5.813982748	0	138.6061252	11043.18889	5.530539513	8.514982589	6.229448019	0	59.37685828	14199.18889	9.114549184	8.511652465	6.097098375	0	76.98684771	582240	197220	500		9.5	1043	Cambisol	3.87
317	378942	3293.2	15.86068566	11.35885309	4.868256419	1.626550407	52.92614281	11669.91429	4.179081766	15.50989131	5.068902667	0.391998277	67.7016102	14963.11429	6.750061122	14.59629814	5.016113592	0.663708229	64.449709	575700	208060	556		9.3	1036.8	Gleysol	4.27
318	378943	3332.1	10.77683473	8.5	3.759274361	30.50253811	41.86550245	13305.9	0	12.70446569	3.795683237	32.37558123	72.16410686	16638	2.158281705	11.86243539	3.788143083	32.00046601	66.09619126	576620	208200	570	SSE	9.2	1058.8	Luvisol	4.92
319	378944	2173.566667	26.12151666	14.77810664	3.565094693	40.99233961	59.50930571	6933.033333	4.401382752	17.89547865	3.75209043	37.2687918	51.89256232	9106.6	9.585552371	17.15142314	3.69961067	38.15752958	53.71052946	578620	198090	560	E	9.3	1075.2	Luvisol	4.79
320	378945	3341.506061	22.97151564	15	3.901504419	23.88618902	34.42643178	9249.956439	6.593886974	15	4.053365202	21.27560853	33.49839876	12591.4625	10.94016092	15	4.007616649	21.96840101	33.74467896	578850	198150	560		9.2	1085.2	Cambisol	4.51
321	378946	3500.133333	13.14805036	8.5	4.217028501	8.476922376	49.4464009	9258.044444	5.061537258	14.0769829	4.87738527	1.600683145	64.03019658	12758.17778	7.280026023	12.54696944	4.58057059	3.487140174	60.02921538	579840	198880	550	E	9.3	1074.3	Stagnosol	4.5
322	378947	3253.552941	28.63199695	7.291246402	3.875311739	27.12677606	37.04723903	11555.21849	4.294825509	5.195891638	4.481559003	8.642911989	15.69166323	14808.77143	9.641810307	5.656250398	4.259459958	12.70389913	20.38357821	582400	194980	540		9.3	1069.6	Cambisol	4.51
323	378948	3241.9	19.77041864	8.5	3.694157067	39.94721591	52.20609985	12699.3	1.194188656	13.15185089	3.962378257	33.34850937	65.61628666	15941.2	4.971964482	12.20582202	3.892794717	34.69046272	62.889109	628600	231250	492		8.9	1178.3	Stagnosol	3.7
324	378949	3016.5	24.95182259	8.5	3.615877666	53.26050256	76.77997877	10104.1	3.745412456	17.74965608	3.838936327	40.43317044	94.02985316	13120.6	8.620885847	15.62310794	3.776602801	43.3822465	90.06400967	629300	230500	490	NW	8.9	1174.5	Planosol	3.25
325	378950	2958.228571	23.49990129	15.11423825	3.798050565	44.92242471	64.43845086	12341.60476	0.781213526	20.90296199	3.884399102	32.88007569	100.5656359	15299.83333	5.173880413	19.78371006	3.866310145	35.20846844	93.580431	629650	230550	490	NNW	9	1172.8	Planosol	3.45
326	378951	3614.32	11.45917058	8.5	3.693185144	28.99576223	47.28091233	12381.38	0.682127	11.38440788	4.084638817	11.846185	74.2608761	15995.7	3.117261702	10.7326594	3.960604528	15.72123016	68.16459881	581050	209850	470	NW	9.8	1015	Luvisol	5.46
327	378952	2951.98	11.81797272	8.5	3.767141868	26.64794163	46.36597854	9319.5	3.574898224	18.15577552	3.963785869	13.81822114	68.36098066	12271.48	5.557820501	15.83301933	3.90773335	16.90448932	63.0699476	581750	209650	460	WNW	9.7	1013.7	Luvisol	5.53
328	378953	3225	6.873190698	8.5	3.82038847	21.54722177	32.54743386	13325.72222	1.556310611	15	4.187962984	6.085468871	32.11298999	16550.72222	2.592334178	13.73343896	4.087803968	9.098277159	32.19764379	572500	191200	590		9.1	1068.9	Luvisol	4.63
329	378954	3358.130769	9.285803389	13.95407163	3.951852578	27.52731449	50.1233273	12741.42637	0.834537014	15.46323659	4.742043812	4.169513562	111.1153221	16099.55714	2.597346848	15.14844698	4.424375777	9.041607205	98.39328926	573850	193700	497	NW	9.7	1010.9	Luvisol	5.1
330	378955	3103.4	18.21962219	8.5	6.334785714	0	100.5295641	4613.463636	2.376236135	8.5	7.218168287	0	107.957143	7716.863636	8.747783773	8.5	6.653221	0	104.9700812	574400	194550	480	WNW	9.7	1016.6	Cambisol	5.4
331	378956	2753.35	9.650585105	13.68062724	3.903899339	17.94413967	42.26531667	11646.85	1.161725316	20.41900385	4.059685186	12.4758986	94.71954029	14400.2	2.78481403	19.13061138	4.025257167	13.52143836	84.69017704	579050	207050	460	SE	9.8	1004.9	Luvisol	5.91
332	378957	3604.116667	13.08452455	15.76036431	3.759807898	25.43930629	56.6495598	13641	0	31.92323082	3.949998784	16.80993473	123.8683842	17245.11667	2.734580108	28.54529736	3.9027857	18.61341699	109.8200892	570750	208000	555	S	9.6	1067	Luvisol	4.11
333	378958	2455.366667	37.70073913	32.42165664	7.487860073	0	294.8977857	NA	NA	NA	NA	NA	NA	4275.8	25.56631917	34.16830535	7.569375073	0	265.6573997	570750	207400	465	SSW	9.8	1028.4	Cambisol	5.68
334	378959	3094.2	17.96834254	22.3635657	7.466914899	0	218.0372339	10447.3	0	29.32320504	7.471622759	0	219.2445753	13541.5	4.105722815	27.73294428	7.470542517	0	218.9687007	570850	189450	520	WNW	9.5	1006.7	Calcisol	4.11
335	378960	3053.86	16.29146955	15	3.862103682	27.56844316	40.05890451	12019.465	1.253927207	21.56784537	4.138192788	17.80626778	75.96838639	15073.325	4.30053763	20.237198	4.06631601	19.78408733	68.69311499	563350	181600	645	WNW	8.7	1069.6	Luvisol	5.43
336	378961	2828.6	15.25236336	15	4.131182792	18.54171376	60.55231964	9572.95	2.924307136	13.90555419	4.627102964	7.109455095	127.9196157	12401.55	5.736144353	14.1551802	4.454956215	9.71697487	112.5541869	563700	181250	640	SE	8.7	1067.7	Luvisol	4.34
337	378962	2867.4	40.01131321	11.3233417	7.347021429	0	211.4509845	7608.88	1.334786775	3.69780283	7.676493043	0	126.3555842	10476.28	11.92070772	5.78494351	7.558972087	0	149.6465377	571050	178250	620		8.9	1095	Kastanozem	5.23
338	378963	2879.3	20.9001101	35.4504897	4.64	7.566203101	137.0520212	7479.8	5.760913126	51.09513089	5.263830387	1.541159677	258.9212154	10359.1	9.968835613	46.74672076	4.987139001	3.215813607	225.0478122	552300	152250	890	NW	6.9	1448.7	Luvisol	4.21
339	378964	3064.739394	22.18533984	24.38113053	4.045446435	26.30431193	98.52791215	11178.44394	7.352009119	35.31812016	4.876288719	3.331773204	157.961756	14243.18333	10.54373192	32.96478228	4.525576514	8.274828613	145.1732355	555100	152200	770	NNW	7.9	1486.4	Luvisol	5.94
340	378965	3126.515385	22.38224238	32.49336666	4.791153128	21.28640798	117.7031683	6917.234615	6.557345456	22.01423223	4.969094639	11.17266273	134.2153599	10043.75	11.48347202	25.27627828	4.905521723	14.32096691	129.0752856	555050	152150	775	N	7.9	1485.3	Calcisol	5.2
341	378966	2668.9	39.83435576	25.17201094	5.468860185	0.366861066	177.8815595	6664.881818	7.103452038	23.85816539	6.250512405	0	144.1189296	9333.781818	16.46252113	24.23384617	5.862484902	0.104900191	153.7730103	556050	151000	875	WNW	7.3	1552.6	Calcisol	4.16
342	378967	2852.433333	27.0094775	15	3.820665619	36.15425995	51.01859133	12534.97536	1.448017973	20.57108793	3.897663388	31.32486118	49.7512137	15387.4087	6.186460985	19.53835024	3.882320689	32.22010861	49.98615321	570900	178150	620	NNW	8.9	1096	Luvisol	4.38
343	378968	3029.264706	18.69584939	23.5	4.250619034	12.46202229	68.92761043	8637.535294	2.444565254	20.6176905	5.633897521	0.209669898	144.4078819	11666.8	6.664183441	21.36607724	4.787803144	3.390972282	124.8095583	570250	177650	680	SE	8.4	1190.9	Luvisol	5.1
344	378969	3142.566667	20.45926841	21.30697731	3.788115996	63.98561386	99.27878265	1865.633333	9.18895602	15.94680359	3.88374563	55.97412094	83.04536668	5008.2	16.26089964	19.31022823	3.821328352	61.00120664	93.23157968	557850	161550	882	NW	7.2	1522.3	Planosol	4.01
345	378970	3159	19.41884462	14.72345204	4.379779584	7.837284093	77.57396428	12870.88889	1.405982503	13.89201618	5.11210858	0.932350692	66.15325674	16029.88889	4.955765774	14.05586671	4.840976703	2.293101522	68.4039283	558150	164300	857	W	7.2	1448.7	Stagnosol	3.86
346	378971	2817.025	31.3022124	17.13652213	4.304758467	14.88434428	70.63902539	11907.31711	4.134011909	19.04234809	5.020893961	2.101271192	80.02436286	14724.34211	9.331765359	18.67773015	4.7646968	4.546897366	78.22878313	556250	166150	810	NW	7.6	1340	Luvisol	4.8
347	378972	2692.333333	24.48039935	15.82348397	3.77267138	36.61823244	77.08785804	4577.521212	3.376702517	13.20936639	5.151045913	1.573626553	161.9563162	7269.854545	11.19229031	14.17748423	4.174221163	14.55212014	130.5259516	570450	176500	647	ESE	8.7	1147.6	Calcisol	3.98
348	378973	3630.55	18.34833227	10.23249921	3.687742938	135.1091623	160.2388538	13168.05	2.286564639	20	3.790793851	122.2835426	143.2129532	16798.6	5.757868824	17.88902647	3.76635842	125.0554434	146.8926279	594700	178300	1180		6.1	1546.5	Planosol	3.64
349	378974	2771.8	42.69653886	41.1612454	4.353743661	13.65499191	207.3180212	10020.64211	21.27593985	44.12174585	5.282735621	1.165228541	214.7466971	12792.44211	25.91724413	43.48027997	4.863895719	3.871445683	213.1370901	592540	174280	1124	SW	7.1	1532.8	Gleysol	3.84
350	378975	1587.95	52.99417299	23.5	5.000246876	1.119932394	193.4187257	3813.35	22.23855783	21.28882085	5.177772517	0.938502502	168.31809	5401.3	31.28052534	21.93889434	5.117658184	0.991841808	175.6975272	585000	144260	1466	NW	4.9	1633.5	Phaeozem	4.4
351	378976	2932.7	30.05247361	15	3.797377526	76.54744481	97.03388763	7496.85	7.58760206	23.95067595	3.995717096	41.63481886	52.81236936	10429.55	13.90453125	21.43382265	3.93022465	51.45194981	65.24708099	591620	155520	1700		3.8	1375.3	Cambisol	3.54
352	378977	2192	57.3197273	34.5035698	5.753692797	0.257378759	247.847948	6156.95	34.48013274	27.26157757	6.679887536	0	256.5904046	8348.95	40.47662227	29.16294804	6.209682407	0.067574275	254.2950903	601770	145490	1379	NNW	5.7	1488.5	Gleysol	2.54
353	378978	2154.1625	59.17514542	23.5	6.794565826	0	289.6045864	6894.2375	6.8244736	22.62487784	7.289109905	0	196.6518236	9048.4	19.28765539	22.83321913	7.111464581	0	218.7811897	601710	145460	1380	NNW	5.7	1488.9	Cambisol	3.15
354	378979	1711.8	46.75228344	23.5	5.364783398	0.943559148	182.5917946	1650.56	5.925790641	20.9394145	7.58841533	0	172.8594311	3362.36	26.71083162	22.24302573	5.655479518	0.480372283	177.8142426	598840	150260	1411	S	6.6	1467.7	Cambisol	3.46
355	378980	1771.35	32.89805112	20	5.175469276	1.163897155	111.1401007	6892.95	10.54269025	20	5.928441413	0.054906228	73.15946373	8664.3	15.11307314	20	5.637713293	0.281630958	80.92431504	600700	151060	1668	NW	3.5	1520	Cambisol	3.88
356	378981	1380.4	99.955	29.55	7.38	0.1297	404.4498	1605.8	21.83163532	25.43552124	7.628023875	0	204.602633	2986.2	57.94492063	27.33747907	7.495752867	0.059955087	296.9839301	610500	162580	1354	NE	5.6	1441.7	Phaeozem	3.64
357	378982	2555.9	33.81471876	33.99284792	5.325586528	0.947408099	173.3011386	NA	NA	NA	NA	NA	NA	NA	NA	NA	NA	NA	NA	601410	175370	1402		5.3	1529.8	Histosol	2.98
358	378983	3253.735294	21.84715936	20	3.538935794	243.7872876	283.0204587	11025.90756	6.219753182	28.78600172	3.906887547	82.31867683	163.2808999	14279.64286	9.780587548	26.78403822	3.791683087	119.1106416	190.5645535	588610	174390	980	NNE	7	1406.9	Stagnosol	5.95
359	378984	2260.535294	33.32780057	14.37373241	3.430174486	72.13914088	110.6779118	9098.248039	0.614496106	16.02139536	3.841341222	48.17325788	65.05080367	11358.78333	7.124839437	15.6934905	3.722777632	52.94275852	74.13115016	587860	173900	1264	WNW	6.3	1545.4	Stagnosol	3.9
360	378985	2659.8	47.38074362	49.28096097	5.416965163	0.497562384	296.6952614	6992.345455	22.84634607	46.16591845	6.787214258	0	306.4675767	9652.145455	29.60718395	47.02431725	5.930604344	0.137111115	303.774662	582520	174410	1052	N	6.8	1447.4	Gleysol	4.51
361	378986	2992	13.38880936	24.6909375	5.590398143	0	130.5690701	NA	NA	NA	NA	NA	NA	NA	NA	NA	NA	NA	NA	566290	158750	1050		6.4	1697	Histosol	3.91
362	378987	2267.118182	41.46559779	23.5	4.951823752	3.808747722	219.1769623	2540.781818	4.283233239	33.04485735	5.641881486	0.746229954	265.7945172	4807.9	21.81621327	28.5440733	5.18882764	2.190330229	243.8124656	564680	157220	1210	N	5.7	1686.8	Gleysol	3.29
363	378988	766.4	131.005	16.4	6.11	0.3213	458.3346	1949.2	44.04943515	27.34128104	7.263530851	0.070582352	314.8273074	2715.6	68.59014251	24.25341913	6.588045595	0.141340197	355.3281135	574820	151790	1269		5.7	1660.3	Phaeozem	3.71
364	378989	2087.26	39.12659856	23.5	6.140222053	0.094892608	259.7359249	3016.92	11.57711679	21.6510282	7.055130798	0.13514105	237.9175748	5104.18	22.84296778	22.40713102	6.458229112	0.118682194	246.8397855	573310	154060	807	NW	8	1423.3	Cambisol	5.6
365	378990	211.96	147.9452359	11.86612568	6.894993209	0.360057917	520.8382148	804.64	13.87405896	5.755680801	7.513082962	0.178000912	168.0571726	1016.6	41.82775428	7.029701948	7.293798567	0.215959601	241.6116382	604900	160530	1159	NW	6.7	1412.9	Kastanozem	4.53
366	378991	1039.933333	95.38064972	23.5	6.827589853	0.144695195	463.7583383	4043.633333	11.5757985	26.28472743	7.703354162	0.058467523	230.9956166	5083.566667	28.71956074	25.71506226	7.335592936	0.076106916	278.6113417	606660	168720	1187	S	6.9	1432.3	Kastanozem	5.14
367	378992	2074.233333	53.93000233	23.5	7.248555631	0.136058486	389.8984146	4246.466667	7.411699531	14.09865457	7.696328074	0.181191749	182.228598	6320.7	22.67738439	17.18384831	7.494385529	0.166380586	250.3785902	607340	165600	1123	W	6.7	1399.3	Cambisol	3.48
368	378993	1939.533333	47.98926013	23.5	7.058845703	0.145703643	296.6846037	4258.383333	8.751938764	19.80146221	7.659986711	0.067227749	188.957966	6197.916667	21.03059574	20.95885714	7.373046944	0.091785455	222.6691977	607370	165640	1113	N	7	1497.9	Cambisol	3.93
369	378994	1137.533333	69.16515531	40.11197621	6.792590111	0.145718344	402.0315004	571.4666667	31.86387832	27.33552263	7.254874537	0.155979941	393.4875813	1709	56.69210884	35.83970158	6.899967274	0.149149684	399.1745285	602490	169270	1100	NW	7.1	1497.1	Cambisol	6.12
370	378995	2751.760714	28.30467723	20.29678109	3.542946871	90.66715132	130.026371	10111.60595	6.049949315	23.70775766	4.137686799	35.29312987	135.2912165	12863.36667	10.81073143	22.97807378	3.92617514	47.13886674	134.1649488	580520	166870	1151	NE	6.8	1656.7	Gleysol	4.77
371	378996	2688.45	20.73580208	35	3.798423577	69.03486647	165.3093908	9965.85	6.507025468	43.98508406	4.046168053	53.89329268	219.7448742	12654.3	9.529978495	42.07617174	3.980442307	57.11017264	208.1798666	580440	166850	1172	ESE	6.8	1656.9	Gleysol	5.87
372	378997	2834.725	24.34598671	20	3.37796806	138.7775569	171.9670097	8940.375	5.365214206	42.22387204	3.950441681	66.23604958	184.4690611	11775.1	9.934625109	36.87372082	3.730647662	83.6996146	181.4593306	580300	167020	1209	WSW	6.6	1666.4	Gleysol	4.99
373	378998	2970.117391	27.33630202	16.51298155	3.291762617	104.733134	131.797221	11711.86039	6.710469918	30.47120161	4.016529255	45.44009694	145.3439959	14681.97778	10.88301013	27.6474981	3.744434903	57.43488969	142.6035264	580330	166920	1198	SW	6.6	1667.1	Planosol	3.84
374	378999	940.3	131.7949846	46.31017229	7.098272343	0.16260654	538.1228754	3914.12	13.04203343	25.84430498	7.71124193	0.05946194	223.5925853	4854.42	36.04445184	29.80853861	7.506902421	0.079441025	284.5170277	581050	159600	1155	E	6.3	1661.6	Phaeozem	5.62
375	379000	1385.128571	40.647407	23.5	4.669065013	9.990305728	152.3087097	4061.065179	14.50828154	25.45248729	4.604643517	12.22149295	122.4583801	5446.19375	21.15623627	24.95591187	4.620143895	11.65403587	130.0502041	581020	159700	1182	ENE	6.8	1688.3	Cambisol	5.33
376	379001	2221.357143	82.14403302	46.06479083	6.948694449	0.142381973	425.6488354	4020.328571	6.294013922	21.46459778	7.664952136	0.049353552	204.6108168	6241.685714	33.28832114	30.21957473	7.267738081	0.082461491	283.2761652	582120	166250	1041	ENE	6.6	1674.3	Kastanozem	6.26
377	379002	595.82	120.1861165	20	7.415224805	0.141886258	485.2591386	935.0228571	53.3215574	20	7.657321213	0.145464688	340.0890139	1530.842857	79.34594091	20	7.546585883	0.144071926	396.5907399	603180	165020	1293	NNW	5.9	1477.4	Calcisol	4.07
378	379003	1094.66	32.57131064	23.5	5.67284914	0.548113661	140.7620455	2197.94	10.63651296	22.24584839	6.686930997	0.072074552	148.2670511	3292.6	17.92897048	22.66280447	6.07396583	0.230338833	145.7719319	597720	164120	990	NW	6.8	1495.6	Cambisol	3.9
379	379004	2058.114286	44.62103819	23.5	5.637572136	0.285387155	200.0469793	8613.085714	12.95113364	31.83711661	5.720198787	0.062982634	141.3561428	10671.2	19.05918924	30.22916823	5.702991498	0.105876959	152.6756241	598140	163290	1400	NNW	5.3	1523.9	Luvisol	4.06
380	379005	2849.1	24.18904939	30.3601067	3.823292546	81.43263392	100.6730297	2012.185714	15.87099501	34.80489233	4.122091474	49.71481434	121.5564857	4861.285714	20.74603634	32.1998945	3.923414234	68.30397882	109.3171198	587780	155740	1387	N	5.2	1594.2	Cambisol	4.03
381	379006	1943.8	53.054933	24.45347258	3.764262772	72.00220664	124.4480812	10060.78889	10.31974583	22.20472235	4.477702787	9.813007382	77.02762978	12004.58889	17.23948774	22.56884316	4.253658185	19.88277042	84.7060163	587700	155560	1403	N	4.8	1598.2	Cambisol	3.15
382	379007	1932.8	56.03669343	15	3.692660533	78.25174728	116.4289027	7397.081818	9.166845807	15	4.030439225	40.88081243	53.36740586	9329.881818	18.87651237	15	3.935707088	48.62266214	66.43137209	587730	155550	1406	N	4.8	1598.1	Cambisol	4.09
383	379008	2260.6	61.17536274	46.36279749	6.694534078	0	346.2933959	8313	25.93377415	48.82853783	6.634377394	0	287.6499117	10573.6	33.46830687	48.30137087	6.646556882	0	300.1876908	569380	156260	1147	NNW	5.9	1669.2	Gleysol	3.6
384	379009	2333.5	18.59867922	20	3.723363303	31.4030469	60.04325461	8360.15	4.902387521	33.59103904	4.421361063	7.731919329	141.0151072	10693.65	7.891104814	30.62528931	4.149423171	12.89728159	123.3459467	590540	173170	1046	WNW	6.9	1490.1	Stagnosol	4.9
385	379010	2728.661905	35.68552122	22.85297957	3.307749089	112.1000427	152.6730301	11398.0131	3.684260738	27.66228794	3.7843105	32.35006863	90.99845061	14126.675	9.865518563	26.73333782	3.642683003	47.75431033	102.9113088	592530	170170	1381	NW	5.4	1611.3	Planosol	3.82
386	379011	2593	90.12609115	17.02532588	3.412748515	112.1156704	157.6206537	11580.8	8.998166103	35.60482523	4.154135213	26.28152841	205.3626346	14173.8	23.83996644	32.20583259	3.892724935	41.98429902	196.628565	582100	172610	1372	SSE	5.3	1642.3	Gleysol	3.54
387	379012	1815.2	346.7988	23.5	3.73	63.5096	158.1909	NA	NA	NA	NA	NA	NA	NA	NA	NA	NA	NA	NA	581560	171950	1438		5.1	1618.6	Histosol	2.74
388	379013	887.7275862	24.99698913	7.900153822	3.06615748	8.286924291	28.87403671	2674.872414	6.933600984	8.5	3.295128913	24.69521403	34.60357883	3562.6	11.43463056	8.350530511	3.225835672	20.60660137	33.17589326	621780	160940	1386	SW	6.4	1386.3	Cambisol	3.96
389	379014	2764	22.08913314	28.99907742	3.477794914	102.9705801	126.2070284	5730.266667	4.734682795	29.29779853	3.862561582	71.16339152	89.46125961	8494.266667	10.38175071	29.20059589	3.697083092	81.51332196	101.4181841	622450	164160	1261	NW	6.2	1323.3	Cambisol	4.1
390	379015	2154.095652	28.4364066	26.31417401	3.682337537	57.50974446	95.67145014	5360.604348	5.120178322	35	4.136145589	24.20159939	79.46425728	7514.7	11.80379656	32.51020001	3.951921013	33.74940974	84.11006399	622570	164280	1215	N	6.2	1325	Cambisol	4.01
391	379016	1973.985714	32.81267392	16.91918417	3.445293752	60.44530633	104.83649	7240.580952	5.769909192	24.17241655	3.871108035	56.03608908	117.211848	9214.566667	11.56313129	22.61859664	3.738580143	56.98065134	114.5607434	622200	163470	1303	SW	5.7	1386.4	Cambisol	3.64
392	379017	2941.057143	6.045529013	9.795463245	3.277489472	37.96487616	49.22772091	5427.77619	2.324199501	10.71494215	3.918383761	34.63435385	41.82932658	8368.833333	3.631985462	10.39180989	3.578777526	35.80479853	44.42934257	622630	163520	1502	NW	4.8	1461.2	Cambisol	2.91
393	379018	3204.05	10.33598498	10.62392909	3.13096355	33.05047048	44.05212583	7359.95	3.775163214	14.14157026	3.64780953	53.45777932	61.17055829	10564	5.7650535	13.07467342	3.418959988	47.26826418	55.97855588	625350	179880	1230	N	6.1	1528.9	Cambisol	4.17
394	379019	944.0333333	54.51868331	15	5.884830359	0.382687426	222.9786084	4639.291667	11.58622313	20.90258481	6.645730239	0.088902189	134.6341808	5583.325	18.84527996	19.90457075	6.389037504	0.138575646	149.5715317	634330	161850	1539	N	4.6	1465	Cambisol	3.22
395	379020	1386.3	86.82766449	15	4.561197736	7.198394345	183.5689413	2383.611111	20.85351702	15	4.235216314	22.40039609	74.01414299	3769.911111	45.11402554	15	4.328951063	16.81020194	114.3004554	634890	161250	1294	E	5.9	1384.3	Umbrisol	4.31
396	379021	2166.56	31.13572484	23.5	4.958750363	4.427719422	204.5770049	1772.115	13.92251152	29.96524774	5.05749516	3.62407238	241.7357698	3938.675	23.39104077	26.40888751	5.000426765	4.06613717	221.2957249	605540	174160	1163	NNE	6.5	1476.7	Calcisol	4.51
397	379022	1342.066667	31.67788287	23.5	4.898689101	1.385724067	167.3066492	1041.104762	11.95274605	23.5	6.367084261	0	209.1008659	2383.171429	23.06082174	23.5	5.136760819	0.780361017	185.564739	605550	174060	1212	NNE	5.8	1462.7	Calcisol	4.98
398	379023	2782.45	29.22488365	35	4.386547636	20.37906603	188.3487436	3741.568182	10.50355274	35	4.627333914	15.80442164	256.8340589	6524.018182	18.48807481	35	4.508074668	17.75547679	227.6255312	605980	173910	1143	NE	6.5	1473.3	Umbrisol	5.36
399	379024	2083.033333	39.1942791	45.27126866	6.588062452	0	346.6859668	2182.166667	13.21902841	20.2086825	7.698714276	0	287.3093574	4265.2	25.90479063	32.4487187	6.865400809	0	316.3076357	613830	170590	764	N	7.9	1331.1	Calcisol	6.23
400	379025	1111.9	92.36504946	15	6.830126963	0.156056786	429.7705011	1602.75	25.24492123	15	7.444809452	0.11912049	269.9639477	2714.65	52.73681543	15	7.087428469	0.134249316	335.4194969	613890	152750	1687	W	3.3	1593.7	Phaeozem	4.16
401	379026	1329.366667	34.72096236	14.71854141	3.956954276	13.01142937	118.0946299	1822.433333	11.90565937	16.29884129	6.477296819	0.234754581	161.7123675	3151.8	21.52870122	15.63230218	4.33007526	5.623702348	143.3152717	613550	152790	1533	W	4.4	1547.3	Calcisol	3.96
402	379027	1164.5	153.0361451	23.5	4.314112063	5.105417424	351.4963988	3147.8	42.29887239	25.26310439	6.270422327	0.446869954	277.8179892	4312.3	72.20253264	24.78699302	4.869889783	1.704871143	297.7142181	613400	153210	1503	W	4.4	1546.6	Kastanozem	3.04
403	379028	1733.6	28.0280728	30.19833872	3.636590731	40.57701612	76.13102228	4526.172727	5.479834679	34.44063477	4.1770602	13.84702537	77.27431317	6259.772727	11.72441053	33.26576074	3.950625554	21.24970818	76.95768681	617850	165640	1416	SE	4.8	1464.4	Stagnosol	3.44
404	379029	2078.283333	27.86234015	32.62732423	3.892153589	39.85687077	97.44154092	4078.816667	6.704531747	30.42139571	4.495759033	17.69709428	101.875828	6157.1	13.84619269	31.16599048	4.190958215	25.1769621	100.3790674	618140	165610	1231	SE	6.5	1296.7	Cambisol	4.48
405	379030	2072.78	61.57249231	35	4.99814175	2.147220026	256.5464592	1817.28	15.40603572	29.36504556	5.511177335	0.535861163	210.9428611	3890.06	40.00537555	32.36757531	5.168066095	1.394457798	235.2422873	600450	139630	1528	NE	5	1506.1	Phaeozem	3.28
406	379031	2029.72	19.76045854	18.65768185	3.836187034	45.79787112	172.2555201	3556.38	7.103996226	10.95592428	7.358471752	0	173.870245	5586.1	11.70274574	13.75437246	4.275631072	16.64074309	173.2835317	600470	139990	1426	NW	5.4	1524.7	Umbrisol	3.23
407	379032	2002.972727	36.61009507	42.42501963	5.0014483	1.254600033	223.3968037	1493.327273	16.34871276	35.92344003	7.209849697	0.039719492	270.7162161	3496.3	27.95612522	39.64808798	5.241382723	0.735704559	243.6077036	612600	170200	1170	N	6.5	1332.6	Phaeozem	5.47
408	379033	1382.3	51.15739926	23.5	5.08179331	1.555704348	162.516012	3283.463636	8.799426603	21.70946977	6.163124412	0	123.1357904	4665.763636	21.34858901	22.23994026	5.532030682	0.460899927	134.802751	641900	165900	1560	SSW	5.5	1492.1	Cambisol	4.99
409	379034	719.5	55.62488117	23.5	3.645005781	45.9192549	115.0846663	3744.9	11.43940773	32.85931534	4.87185724	4.970329501	65.06419779	4464.4	18.56050981	31.35093182	4.320892947	11.56981696	73.12569029	639710	164230	1187	NNE	5.9	1439.5	Luvisol	4.43
410	379035	876.0875	27.71277598	23.13325581	3.859387307	25.9242582	69.35419425	3255.4625	10.78323906	23.5	3.99100288	27.19341236	58.16766721	4131.55	14.3731159	23.42223258	3.959568966	26.92429058	60.53974948	645050	164640	1201	S	6.2	1474	Cambisol	3.38
411	379036	1024.091667	37.18943006	23.26759893	3.321045636	28.27347699	59.66849422	3695.788333	14.62096641	23.5	4.467279997	12.32416566	50.5148282	4719.88	19.51773827	23.44957499	3.885056709	15.78475297	52.50093655	645210	164660	1221	SW	6.3	1470.5	Cambisol	3.73
412	379037	1499.9	55.42367958	17.57814521	4.585729535	5.950510214	147.3999875	813.9	14.1	16.8	4.75	5.2432	77.0481	2313.8	40.88770291	17.30442562	4.636721519	5.701707473	122.6530771	645760	165260	1461	SSE	5.4	1530.6	Cambisol	3.96
413	379038	2718.121311	23.00578818	18.42936765	3.658521669	44.93062988	61.22482696	7121.578689	8.639506149	18.03133809	4.053984092	30.76543386	39.2687879	9839.7	12.60805167	18.14128988	3.90463199	34.67843133	45.33392989	645730	166050	1744	SSE	4.2	1606.3	Cambisol	2.62
414	379039	1431.133333	58.24996238	19.18648856	5.885895381	0.388538571	246.3658358	3416.291667	13.2846923	8.773850667	7.129461839	0.018350564	142.4035082	4847.425	26.56004918	11.84803401	6.360255858	0.127643312	173.0969078	648550	164040	1303	NNW	5.3	1506.7	Calcisol	3.71
415	379040	1801.35	33.21561523	23.16691648	3.760973725	45.11536829	105.8243081	1227.65	24.57014255	23.5	4.047584485	32.96042966	94.80929238	3029	29.71161571	23.30191482	3.855614074	40.18898651	101.3599357	630660	167500	1246	E	6.1	1370	Cambisol	5.21
416	379041	691.92	58.92527857	14.76514626	5.703963998	0.355494063	322.4532825	2951.521463	23.90996187	15	7.72131521	0.142839016	226.2958978	3643.441463	30.55966331	14.95539931	6.407974891	0.183223987	244.5569892	646100	162400	1120	N	6.4	1433.8	Phaeozem	4.02
417	379042	1586.566667	76.1760156	35	6.983834625	0.171753487	431.5013295	4790.933333	8.606863398	35.25746549	7.54823844	0.02870211	206.3368145	6377.5	25.41642272	35.19341435	7.327168693	0.064289808	262.3522616	635070	167100	1767	SSE	3.6	1555.6	Kastanozem	2.92
418	379043	2136.475	52.69203852	35	5.100435076	6.058864046	213.02953	7363.802778	11.66140449	42.18593088	5.686357074	0.393135658	239.4311933	9500.277778	20.88860035	40.56991901	5.471025228	1.667275987	233.4938413	634450	167660	1406	NNW	5.1	1425.3	Cambisol	3.66
419	379044	2737.62	22.93555132	23.5	5.223547641	5.51466673	112.8895703	6687.569474	5.641955212	18.04888496	6.076782424	0.498830687	120.9762595	9425.189474	10.66501546	19.63220396	5.632550326	1.955719496	118.6274174	618450	175900	795	W	8.3	1296.9	Cambisol	4.68
420	379045	2733.7	19.7860943	15.62437356	3.873312554	41.77143355	72.68570936	8851.705882	3.712398667	21.63197167	4.450142289	8.423668939	126.4268362	11585.40588	7.505158473	20.21441486	4.231446132	16.29242943	113.7460445	618500	175770	794	SSW	8.5	1292	Luvisol	4.3
421	379046	2314.56	23.81519693	15.11093469	3.575854927	74.62229519	99.62258043	6685.471579	3.898166505	18.39991876	4.085199177	41.20817255	164.6254645	9000.031579	9.020277636	17.55408273	3.888259116	49.8013637	147.9085147	618940	175160	813	SW	8.4	1303.1	Luvisol	4.34
422	379047	2169.25	23.25198179	23.5	3.914002726	70.86524466	138.2733079	6543.9	3.732486361	29.11538608	4.329164983	48.68013419	124.1900854	8713.15	8.592114103	27.71736398	4.183464608	54.20340085	127.6962836	621820	177140	1253	E	6.1	1393.2	Luvisol	4.53
423	379048	2891.76	39.47080214	18.14661486	3.372141156	105.6739419	132.0849966	7621.715	4.520907263	8.665523934	4.068378666	105.7616385	112.2279511	10513.475	14.13397126	11.27332388	3.747903106	105.7375173	117.6896856	621000	177610	1318	WNW	5.3	1409.5	Cambisol	3.56
424	379049	3010.2	17.99729254	23.5	3.823598707	42.62195836	87.81645042	4004.622222	6.584094756	23.47720412	7.298421914	0.184786125	254.6943085	7014.822222	11.48172536	23.48698629	4.190826458	18.39542238	183.0836942	646180	179210	916	S	8.3	1579.1	Luvisol	4.38
425	379050	1155.5	160.7996798	15.31061878	3.982450087	16.69711578	261.2370936	897.3	90.89	15.6	5.71	0.2279	245.5385	2052.8	130.2414395	15.43711029	4.225756836	9.498252119	254.3750768	653560	178680	1003		6.6	1641.6	Cambisol	4.51
426	379051	2690.1	21.18011895	12.83930895	3.276510844	51.63962987	68.514064	4267.4	5.382041993	10.81524113	4.176340708	18.13483206	24.87168549	6957.5	11.490329	11.5978419	3.610091842	31.08937846	41.74590215	657920	178780	1559	W	4.9	1703.5	Podzol	2.63
427	379052	2479.8	45.35170498	36.24030164	5.482374398	0	195.0297269	4744.658333	9.632758071	26.85538061	5.7872264	0	104.5918348	7224.458333	21.89330972	30.07676083	5.657111809	0	135.6346998	658280	178600	1562	S	4.9	1704.9	Cambisol	3.72
428	379053	3330.763158	26.54040128	16.07709155	3.463667071	39.5563538	62.79476134	6712.386842	4.156980976	32.28837534	4.603710335	6.539094656	122.8165555	10043.15	11.58033637	26.91197981	3.883816663	17.48911236	102.9106116	658300	178710	1623	SW	4.8	1700.4	Planosol	2.23
429	379054	1724.960377	47.9826694	8.5	2.992945647	20.33101773	55.57222498	4276.439623	12.30855785	11.80909618	3.175302111	36.01035594	51.42257142	6001.4	22.56223681	10.85797481	3.114612603	31.5037013	52.61529111	649040	180550	1390	S	6	1650.3	Umbrisol	3.85
430	379055	1487.8	41.22254082	22.84127571	3.678638964	32.090687	121.9162011	3167.014286	7.389724925	23.5	5.471036581	0.400568719	168.6934745	4654.814286	18.20357493	23.28945454	4.159336517	10.52955671	153.7422384	649210	180590	1409	S	6.1	1641.9	Cambisol	5.34
431	379056	2156.95	54.66821484	15	4.174778194	27.49114322	85.79602154	NA	NA	NA	NA	NA	NA	5361.866667	37.9055579	15	4.509592907	13.81614932	96.14746882	653700	177730	861	S	8.4	1579.5	Cambisol	5.36
432	379057	1169.75	78.56251929	35	6.882842993	0.227515944	442.7699686	3550.17	15.62059303	35	7.426523352	0.237578818	272.6853102	4719.92	31.21965366	35	7.217328144	0.235084909	314.8378317	606510	169330	1462	S	6	1473.5	Kastanozem	3.6
433	379058	2535.65	17.15279008	19.87579615	4.902018134	1.864325843	115.9575808	6091.664286	4.061218526	13.95106762	6.726182316	0.302909045	171.9498363	8627.314286	7.90895634	15.69240187	5.418438436	0.761824343	155.493178	605500	231800	657	S	9.3	1334.2	Cambisol	5.41
434	379059	2208.3	62.34540821	36.13610017	7.614325549	0.185247231	383.8746369	3858.75	16.96944655	32.2387172	7.789537634	0.199492095	277.0893973	6067.05	33.48550232	33.65729638	7.717329252	0.194307214	315.9573553	617580	253960	519	SE	9.1	1145.8	Phaeozem	4.51
435	13078	1545.9	57.92790239	35.06286629	7.262499872	0.191462721	350.9457409	2979.033333	9.96931027	15.82340748	7.751330278	0.234293602	186.6220807	4524.933333	26.3539025	22.39638374	7.518006692	0.219660843	242.7616805	614000	255500	592	NE	8.8	1148.3	Kastanozem	3.87
436	379060	1067.2	42.42729822	39.47926349	7.062349497	0.447029891	262.9988114	1315.2	10.51561948	26.76332877	7.584729658	0.439652372	189.6946164	2382.4	24.81050848	32.45945265	7.274353469	0.442957144	222.5313512	603500	231800	742	S	9.1	1387.2	Cambisol	3.83
437	379061	458.2888889	155.9312823	49.12456966	7.262739378	0.26279006	527.354437	846.9111111	25.67073236	25.34751909	7.646870289	0.191494802	251.3731147	1305.2	71.40852174	33.69624579	7.47100617	0.216528379	348.2771705	593770	227670	759	S	8.5	1380.2	Kastanozem	4.44
438	379062	2223.633333	35.67944897	50.96873136	6.553657958	0.022260073	352.931527	3978.966667	13.28222217	34.65976384	7.590039304	0	246.2921906	6202.6	21.31163243	40.50653194	6.933006476	0.007980241	284.5224139	604950	259100	485	WSW	9.6	1044.3	Calcisol	4.27
439	379063	3178.2	38.61272958	53.98894657	6.415699567	0.188659958	363.0656776	8705.5	8.24056877	43.70301131	7.09791309	0.133618931	275.434408	11883.7	16.36335894	46.45390198	6.792743083	0.148339211	298.8706864	615200	241950	870	S	8.1	1482.4	Cambisol	4.11
440	379064	1799.9	57.73060196	53.72056448	7.312463015	0.187325674	446.5472314	5466.9	16.32382545	46.30309408	7.698934523	0.269197981	362.0304796	7266.8	26.5797919	48.14031334	7.566868863	0.248919183	382.9642746	617550	253850	540	NE	9.1	1155	Kastanozem	4.33
441	379065	3096.45	28.57464434	45.53328005	5.596730796	0.389112513	269.0540076	11389.41	4.095705848	47.77199829	6.716450381	0.167934102	329.8094013	14485.86	9.328243584	47.29345721	6.159872086	0.215212475	316.8225273	608500	233250	690	S	9.1	1361.5	Cambisol	5.66
442	345839	503.85	179.3959	22.25	7.38	0.2458	602.1905	875.6	71.38378007	16.49681076	7.626797945	0.244175069	391.4353819	1379.45	110.8356679	18.59818768	7.519758149	0.244768582	468.4145883	609250	236500	685	NNW	8.5	1303	Kastanozem	4.5
443	379066	948.8	164.7466809	24.7491094	7.287464231	0.187558579	553.9672439	1862.4	77.2552118	21.73266216	7.579258123	0.144988971	402.502185	2811.2	106.7842051	22.75073456	7.457598755	0.159356517	453.6227199	603100	256100	802	N	8	1230.5	Calcisol	4.22
444	379067	2747	26.22759851	44.53906261	7.474057574	0.149988253	319.2810664	5805.6	4.492236053	31.00507097	7.622573358	0	217.0863763	8552.6	11.47339274	35.35203856	7.569128182	0.048174559	249.9101742	636325	249325	660	S	8.9	1131.1	Calcisol	5.78
445	379068	2056.8	65.99265738	35	6.098791605	0.299867809	437.0699023	657.6	28.82855909	35	7.205662143	0.250545833	497.5968791	2714.4	56.98915346	35	6.208550518	0.287918896	451.7333786	603225	232650	1045	SSE	6.9	1734	Cambisol	3.53
446	379069	890.3	84.17592855	36.99110974	7.294230913	0.052654117	409.5146942	8060.08	5.178388331	37.74098768	7.538484739	0	263.5382701	8950.38	13.03632398	37.66639685	7.507039526	0.005237539	278.0586379	617500	254025	525	NNW	9.1	1144.3	Kastanozem	3.51
447	379070	2132	80.7433	52	6.14	0.1964	398.6363	2046.133333	24.95811814	48.57998013	7.378503321	0.159880418	363.8880846	4178.133333	53.42394205	50.32513323	6.408770989	0.178515474	381.6192553	566820	223800	1071	E	6.2	1451.2	Phaeozem	4.3
448	379071	551.3	142.2172	60.85	7.32	0.167	556.4193	1101.8	75.18680386	39.25054003	7.53598942	0.151293955	415.3794603	1653.1	97.54108212	46.45384429	7.451455623	0.156531837	462.4154918	619760	241680	711	S	8.5	1291.8	Kastanozem	3.76
449	379072	2170.5	42.8935439	45	6.882180251	0.133317176	342.6385901	3360.166667	11.77793788	36.93214622	7.541014113	0.09000167	242.4855025	5530.666667	23.98920045	40.09836066	7.161422936	0.107000761	281.7903982	597725	230350	1120	S	7.1	1668.8	Calcisol	4.76
450	14206	1006.466667	92.1308293	56.24276677	7.18262038	0.163002279	525.7814928	2082.4	45.48678472	48.80473012	7.745536216	0.100598559	414.3743034	3088.866667	60.68513452	51.22831675	7.474816644	0.120931992	450.674874	617500	254000	530	SE	9.1	1145	Calcisol	3.95
451	379073	1650.6	76.31536411	53.443257	6.302043157	0.210451121	421.5261107	3065.45	13.006417	29.14885335	7.596249708	0.214980624	269.6240852	4716.05	35.16431357	37.65180448	6.718831756	0.213395315	322.7892305	608900	238890	1157	NW	6.3	1684.4	Cambisol	3.04
452	379074	538.3	169.7336	35	6.31	0.4934	546.4163	NA	NA	NA	NA	NA	NA	538.3	169.7336	35	6.31	0.4934	546.4163	569600	218650	1387	SE	4.4	1306.8	Phaeozem	3.68
453	379075	2900.3	21.58983105	31.45018446	4.039539555	18.2536629	127.7150808	6454.9	7.867713904	33.91636586	5.155063807	0.646542689	187.1258999	9355.2	12.12184598	33.15180007	4.479749449	6.105103784	168.7073521	608300	235120	1087	S	6.6	1708.6	Luvisol	3.76
454	379076	1895.2	85.53866949	52.82349092	6.654006679	0.173148005	478.309255	3481.05	4.873982994	22.98433878	7.606830878	0.094075029	207.4648305	5376.25	33.30936339	33.50303883	7.025932945	0.12194931	302.941111	598250	231900	1150	NW	6.2	1675.1	Calcisol	2.95
455	379077	2537.3	39.69288458	28.88866709	5.2179123	1.033756056	148.5658093	2417.171429	18.0910412	26.69049213	6.17955254	0.267892726	226.7353564	4954.471429	29.15384739	27.81622863	5.465544042	0.660109142	186.702914	593660	229950	1220	NNW	5.5	1541.5	Phaeozem	3.72
456	379078	824.72	155.3937715	35.04451935	6.354585641	0.340672529	540.9795408	394.38	90.25052538	32.13643947	7.353056553	0.18683912	494.6161826	1219.1	134.3198699	34.10375277	6.503961916	0.290907276	525.9809507	603650	233500	1300	N	5.3	1617.3	Cambisol	2.8
457	379079	1501.725	98.50288502	35	7.03772668	0.24244162	432.9427056	1862.948333	24.21107104	30.78955401	7.553330227	0.221325817	249.6207758	3364.673333	57.36908172	32.66876527	7.248688612	0.230750248	331.4412373	572750	220750	1455	S	4.1	1274	Phaeozem	2.62
458	379080	829.4	64.42342386	41.01334579	7.055194356	0.247931252	391.8888925	NA	NA	NA	NA	NA	NA	829.4	64.42342386	41.01334579	7.055194356	0.247931252	391.8888925	618025	256640	630	SW	8.6	1153.1	Cambisol	4.44
459	379081	388.9	162.9312662	26.97548213	7.320157224	0.230861635	507.5261757	65.3	127.8432	35.65	7.47	0.1635	451.1178	454.2	157.8866807	28.22261118	7.338769759	0.221177103	499.416385	602200	249150	597	S	8.8	1207.5	Cambisol	2.71
460	379082	83.8	270.2100162	24.62917661	7.306690004	0.218797017	776.388371	77	228.9991288	17.83402597	7.52	0.182137662	727.9288606	160.8	250.475947	21.37527985	7.395978889	0.201242475	753.1832572	603350	232300	1045	NNE	7.1	1734.6	Histosol	2.91
461	379083	1427.666667	139.6805114	35	7.175681801	0.243398363	606.2348565	1231.393333	44.57776922	25.25563183	7.546094608	0.104769935	432.0914384	2659.06	95.63905215	30.48744669	7.309828953	0.179200443	525.590176	569875	218120	1179	SE	6.4	1427.4	Calcisol	3.53
462	379084	1445.9	63.55751954	30.3185075	7.200229467	0.206460516	362.5527039	3565.14	12.87850216	27.16407771	7.562273601	0.212501862	282.0690567	5011.04	27.50157267	28.07426602	7.423784818	0.210758674	305.2920415	720545	239200	1114	E	7.3	1697.3	Regosol	4.41
463	379085	1724.14	71.39332119	23.15863097	7.421625253	0.157655063	368.7647267	3371.71	12.45500764	14.01611734	7.778998663	0.082796581	205.8114054	5095.85	32.39631359	17.10941354	7.623031042	0.108124348	260.9453555	720275	240005	1092	SSE	7.3	1691.1	Phaeozem	3.27
464	379086	2764.7	40.03384798	24.08846529	7.06705952	0.233965656	282.549866	7058.3	2.083648683	21.91086664	7.738247345	0.172713148	224.6112923	9823	12.7647966	22.52375547	7.428914836	0.18995277	240.9182021	720425	239840	1046	N	7.2	1698.5	Stagnosol	4.83
465	379087	814.425	84.85374114	24.96911778	7.180719391	0.169388783	385.3803853	3496.655	26.46882935	23.55621708	7.361734768	0.184975301	284.2899867	4311.08	37.49857869	23.82313434	7.321255695	0.182030784	303.3874165	720280	239790	1033	NNE	7	1989.3	Calcisol	3.2
466	379088	2718.133333	37.34898618	23.5	5.613952062	0.673825655	283.5797151	8029.966667	6.19903158	27.84824968	5.882169924	0.308706169	291.0939045	10748.1	14.07667785	26.74860208	5.797204745	0.401042809	289.1936088	720210	239830	1051	N	7	1988.9	Luvisol	5.29
467	379089	3253.1	23.02115196	34.53266115	3.441525035	249.3801869	323.6529268	11255.73333	4.347683413	45	3.96956926	79.87451719	234.6556415	14508.83333	8.534557652	42.65306423	3.78427901	117.8802535	254.6101797	720250	239800	1040	N	7	1989.2	Cambisol	4.28
468	379090	1647.8	62.0474032	37.85923049	6.598430463	0.385699041	341.412937	NA	NA	NA	NA	NA	NA	1647.8	62.0474032	37.85923049	6.598430463	0.385699041	341.412937	720175	239925	1080	SE	7.3	1691.5	Phaeozem	4.92
469	379091	3097.8	13.99880503	21.83466008	4.831505879	1.652790209	129.2376729	9648	5.146574098	23.01707245	6.273450817	0.172454158	221.8261913	12745.8	7.298062508	22.72969331	5.399490607	0.53224209	199.3230363	749940	253420	900	NE	7.7	1547	Calcisol	5.06
470	379092	3337.82	21.41559076	20	3.765619886	45.49085446	82.55417621	13456.96889	0.552761619	20	4.765745266	3.431049999	121.2904738	16794.78889	4.69906967	20	4.320258366	11.79007478	113.5919675	749800	253250	915	NW	7.7	1559.7	Stagnosol	4.27
471	379093	3402.4	22.52491779	23.5	6.046357294	0.264359955	142.1377798	11185.16	2.13103319	22.13351441	6.324178409	0.193072933	181.3571882	14587.56	6.887699348	22.45223327	6.241764553	0.209699906	172.2096601	749675	253310	900	WNW	7.7	1557.3	Gleysol	3.89
472	379094	3454.321739	18.09474393	27.95339361	5.722270332	0.244973985	191.5386157	11963.54493	3.997488062	24.85437802	6.691119223	0.16117977	166.3300056	15417.86667	7.155931345	25.54870216	6.234549176	0.179953585	171.9779108	747850	252240	907	NE	7.8	1546	Gleysol	5.57
473	379095	3321.3	26.49593027	24.47165267	3.678507144	95.92909149	116.0583787	11881.38	1.864599677	16.54843663	3.942263858	77.92999508	112.8423974	15202.68	7.245758677	18.27940626	3.869450879	81.86222275	113.5449866	748040	252170	921	NNE	7.9	1542.1	Planosol	4.35
474	379096	2759.94	29.14037664	30.29645862	7.353669308	0.130421953	295.6406755	11554.98	20.09353846	31.96249461	7.430474606	0.153707549	297.6692857	14314.92	21.83778367	31.64128015	7.414571047	0.149218048	297.2781664	745180	252180	751	SSE	8.5	1421	Phaeozem	4.13
475	379097	1406.05	55.07685858	21.1399239	7.462764862	0.161173699	303.0325027	2365.525	7.266230382	21.14683316	7.662931587	0.107661927	227.363728	3771.575	25.09011928	21.14425737	7.577185858	0.127611213	255.5731844	745000	252110	747	SE	8.7	1398.1	Calcisol	4.37
476	379098	2187.72	22.73849871	23.52405244	7.535539434	0	251.0720905	4249.58	4.11078356	25.19149539	7.689593465	0	256.4553815	6437.3	10.44142296	24.62481397	7.630900546	0	254.6258671	744850	252140	753	SSW	8.6	1419.8	Regosol	5.39
477	379099	3264.566667	11.12982782	35.12425079	3.464198195	141.4108383	208.2173777	10733.07333	3.93267032	43.71256704	4.041324304	47.46971983	227.6292546	13997.64	5.61121045	41.70957719	3.824468052	69.37891623	223.1019653	744840	252060	740	WNW	8.7	1403.1	Planosol	4.64
478	379100	2682.1	20.2772432	15	7.512369296	0	246.1090072	1897.56	6.773620439	15	7.751699376	0	203.7834077	4579.66	14.68208234	15	7.596203044	0	228.5715995	745380	255425	661	SW	8.8	1302.5	Calcisol	4.02
479	379101	3037.4	28.60852623	19.71749193	3.28320556	109.3809104	139.102631	10837.16923	1.684966036	23.91017009	3.681123653	109.3960493	135.6434252	13874.56923	7.579031674	22.99231524	3.557811086	109.3927351	136.4007094	745390	255440	662	WNW	8.8	1302.4	Cambisol	4.27
480	379102	3204.65	29.52365539	35	7.409567633	0	288.4585532	9177.15	12.51590616	35	7.506370674	0	262.1562036	12381.8	16.91784155	35	7.479173944	0	268.9637618	745325	255350	665	W	8.9	1279.2	Calcisol	5.12
481	379103	3059.1	27.44041744	23.5	7.675876616	0	299.263418	13348.12	5.890170406	35	7.793176485	0	277.1790158	16407.22	9.908179594	32.85584334	7.768766733	0	281.2966174	744765	255040	588	WSW	8.9	1241.4	Gleysol	3.88
482	379104	3281.316667	21.41236211	35	7.14692347	0	325.3451821	6070.883333	1.857983819	35	7.682813048	0	275.2082114	9352.2	8.718840879	35	7.414646645	0	292.7992892	744500	254820	581	NW	8.9	1243.4	Kastanozem	4.97
483	379105	2371.6	22.27832662	24.22852505	3.412011438	119.8453159	147.1086571	9270.5	2.528035877	26.49546357	4.18383111	37.36777461	164.362422	11642.1	6.551346924	26.03366789	3.882615538	54.16918817	160.8476756	731000	255840	583	WNW	8.8	1263	Cambisol	3.7
484	379106	3261.54	31.83746993	15	6.295271713	0	230.7890778	5340.785	6.893867869	11.35734026	7.376257193	0	192.5905017	8602.325	16.35114318	12.73844135	6.661127448	0	207.0733518	731025	255825	590		8.8	1263.4	Gleysol	4.23
485	379107	2920.208108	67.55234029	35	7.201353001	0	368.3396984	8198.991892	7.76840058	32.89692437	7.09142236	0	188.8782713	11119.2	23.46930941	33.44924995	7.117708654	0	236.0097838	730875	256170	570	NW	8.9	1254.9	Gleysol	4.04
486	379108	2544.466667	80.38043868	29.83413682	5.282095167	0.328618823	330.3207411	9083.37619	14.21574188	22.53903628	6.765065714	0	167.6051012	11627.84286	28.69425415	24.13538913	5.893787639	0.071910126	203.2114064	730920	256225	569	SW	8.9	1254.5	Gleysol	4.26
487	379109	2663.274194	36.8204771	14.57047462	3.504993411	42.47937	61.76447453	6468.025806	6.495050474	16.6159875	3.986215769	36.04338723	89.32448819	9131.3	15.33989471	16.01938442	3.784373541	37.92053362	81.28621618	729650	258260	553	WSW	8.9	1185.6	Podzol	5.93
488	379110	2794.057143	29.3906848	35	7.372990454	0	285.1360938	10165.49286	16.24627275	35	7.431602249	0	275.5084505	12959.55	19.08018584	35	7.418279695	0	277.5841542	729610	258130	540	NE	8.9	1187	Phaeozem	4.17
489	379111	2886.238095	20.60790852	46.35286804	6.92281404	0	355.4553086	8503.361905	5.296251892	38.0967087	7.458535249	0	327.9969455	11389.6	9.176378205	40.18890172	7.249921552	0	334.9551682	729585	258200	549	WSW	8.9	1185.8	Gleysol	4.15
490	379112	1603.35	32.19898572	23.3193813	7.494916761	0	285.5367824	1324.25	5.614594087	8.737564659	7.768281989	0	198.0088269	2927.6	20.17398892	16.72354488	7.597999858	0	245.9450024	729560	258260	557	WSW	8.9	1184.9	Calcisol	5.99
491	379113	2650.309091	35.14345035	15	3.333743286	62.51879711	87.22392016	9029.762338	3.940864539	20.44663837	3.815285054	51.1806884	117.7784388	11680.07143	11.02100076	19.21074908	3.650699794	53.7534032	110.8453546	726450	255550	610	N	8.7	1298.2	Cambisol	5.18
492	379114	2352.95	31.50145658	15	4.848229281	1.057772511	212.6354903	4983.35	4.726669309	20.06262855	7.276558105	0.060986178	188.1512712	7336.3	13.31406837	18.43890653	5.338676589	0.380682538	196.004023	726400	255650	595	N	8.8	1238.7	Calcisol	4.84
493	379115	1143.385714	43.82804834	23.39233729	7.525166428	0.042234173	293.6808713	1368.397619	4.810384278	9.151794678	7.809466579	0	189.8838634	2511.783333	22.57156579	15.63421407	7.656932211	0.019225364	237.1331681	726725	255150	650	SW	8.5	1367.7	Kastanozem	4.72
494	379116	2625.4	39.88473848	23.32796907	7.709313962	0.119071235	286.5165167	7571.3	2.860148727	27.11123651	7.687422833	0.112837789	263.137674	10196.7	12.39307192	26.137138	7.692954645	0.114442748	269.1571522	730650	251120	760	W	8.1	1489.3	Calcisol	3.83
495	379117	3512.875	12.1073431	22.00275095	5.042069314	0.471054384	108.4754764	7079.325	6.110245786	22.33642279	7.044969876	0.09130902	181.2493281	10592.2	8.099167183	22.22576141	5.512784799	0.217250562	157.1140735	730875	250760	803	SW	8.1	1495.6	Gleysol	3.9
496	379118	3217.375	20.74595656	31.36776604	5.008176244	1.489847456	196.5426882	8531.867857	2.682287441	30.18419474	6.229419459	0	249.8441508	11749.24286	7.628784688	30.50830011	5.506477138	0.407975052	235.2482492	730875	250980	769		8.1	1490	Stagnosol	4.47
497	379119	1755.14	29.35280741	27.82395137	3.806611576	72.29489711	145.6998588	7753.01	5.627898145	37.72509838	4.124859803	50.57684799	209.284171	9508.15	10.00735548	35.8974138	4.045850799	54.58585255	197.5469382	721050	239950	1112	WSW	6.9	1917.7	Cambisol	5.79
498	379120	2665.981818	16.31937405	35	5.729169184	0.156640041	190.1430948	9173.568182	1.302434712	22.52858509	7.736514602	0.024517289	198.0810024	11839.55	4.683888166	25.33684768	6.362196964	0.054268154	196.2935766	723110	258830	631	SSE	8.7	1208.8	Calcisol	5.18
499	379121	2811.8	29.92841494	20	7.611555093	0	261.4994993	1399.2	0.731126358	8.5	7.95	0	155.5424	4211	20.22695538	16.17886488	7.697661762	0	226.2928564	723240	258930	641	SSE	8.6	1245.2	Cambisol	3.98
500	379122	2508.478378	21.40487259	12.36046096	7.703196144	0	210.2992624	3753.071622	7.010201903	17.25425864	7.789663858	0	214.3237932	6261.55	12.7769402	15.293724	7.752932392	0	212.711501	723570	259150	666	SE	8.4	1331	Calcisol	4.71
501	379123	3092.013043	26.78739638	19.19825328	7.6744864	0	239.2161633	NA	NA	NA	NA	NA	NA	6875.033333	14.49555575	12.64148634	7.771267798	0	184.809325	723110	257630	500		8.9	1133.7	Phaeozem	4.81
502	379124	2760.966667	30.48028497	27.65983472	7.616625045	0	275.1640131	NA	NA	NA	NA	NA	NA	5210.5	20.07439649	21.81043182	7.696578829	0	231.5964603	723300	257680	500		8.9	1126.1	Cambisol	4.94
503	379125	2431.855556	25.44130522	8.5	7.663778803	0	196.0469019	3994.544444	7.156327009	8.122610282	7.857986734	0	170.2852577	6426.4	14.07566378	8.265420764	7.773987177	0	180.033888	720400	254380	660	SE	8.6	1360.6	Gleysol	4.08
504	379126	3397.083333	22.03654074	20	5.810604878	0.211588504	269.9736098	12215.88333	0.547532428	32.84930957	7.687546073	0	210.9630689	15612.96667	5.223130189	30.05354524	6.45273081	0.046037617	223.8026355	719900	254670	665		8.4	1366.7	Gleysol	3.72
505	379127	847.5	59.36048772	21.60883776	6.370824977	0.235016991	295.3925498	NA	NA	NA	NA	NA	NA	847.5	59.36048772	21.60883776	6.370824977	0.235016991	295.3925498	719800	254820	660	SSW	8.4	1366.4	Leptosol	3.45
506	379128	3435.88	22.23505684	36.90600312	6.168285315	0.163577387	252.1215282	12639.77714	8.058127088	31.75331317	6.838503864	0.055163109	195.5179531	16075.65714	11.08818856	32.85460714	6.586508055	0.078334694	207.6159401	719230	255160	660	SW	8.6	1348.5	Cambisol	5.88
507	379129	2262.266667	52.72899203	15	7.56538908	0.139778211	360.5136449	6322.033333	8.745672757	15	7.757676364	0.007005574	218.7403776	8584.3	20.33683302	15	7.698193245	0.04199586	256.1026479	719415	255625	590	NNE	8.7	1245.3	Stagnosol	4.84
508	379130	2749.6	35.64400851	35	7.635803917	0	312.0390026	8687.8	3.816177512	30.1223152	7.644862254	0	273.2999622	11437.4	11.46772455	31.29493154	7.642667278	0	282.6129936	719470	255580	590	NE	8.6	1295.8	Phaeozem	5.12
509	379131	2599.45	64.47671485	23.32004847	7.743122783	0	331.7762949	6418.783333	46.54879146	19.84979916	7.733170486	0.021631944	310.0184242	9018.233333	51.71640453	20.85007707	7.736015855	0.01539667	316.2899959	719375	255650	590	E	8.7	1245.6	Gleysol	3.38
510	379132	3054.85	16.34512588	19.76221418	3.796700199	41.52616055	58.49972797	11833.93	3.817516586	20.77983316	4.03459386	33.93748812	74.09695569	14888.78	6.387906319	20.57104014	3.97402619	35.4945167	70.89674781	730530	258770	579	N	8.9	1211	Luvisol	5.12
511	379133	3021.5125	16.80893641	15.79589858	3.677621789	42.27075245	60.90743389	8104.1375	2.565484702	18.29284609	4.116966057	23.71871402	76.22115643	11125.65	6.433732166	17.61472318	3.948089766	28.75709074	72.062244	730400	258730	580	W	8.9	1210.5	Cambisol	4.52
512	379134	1949.042857	19.2676505	23.5	4.583666101	2.60404278	134.3294852	1575.357143	10.1782	23.5	5.96	0	166.4849	3524.4	15.20479419	23.5	4.826417755	1.440072347	148.7025026	731510	258940	520	SSE	8.9	1201.6	Cambisol	6.09
513	379135	2158.607143	14.76526919	23.5	7.716011541	0	175.7787933	4987.192857	4.715306947	21.20421952	7.783668891	0	153.5879173	7145.8	7.751204997	21.89773014	7.762097645	0	160.2913491	751360	259060	480	WNW	9.2	1136.5	Gleysol	3.34
514	379136	2635.375	26.96308326	19.53096808	7.685799624	0.30654339	256.5352306	8670.225	3.669394268	15	7.845415893	0.236962236	190.8879129	11305.6	9.099234845	16.05618455	7.80262939	0.253181847	206.1905328	751240	259100	480	S	9.2	1134.3	Cambisol	4.61
515	379137	2864.366667	36.01733461	23.5	7.609460056	0.11817172	242.38361	3257.147619	6.540741042	27.16208894	7.77507228	0.020242771	252.4368146	6121.514286	20.33336948	25.44853164	7.689700995	0.066065488	247.7327393	751290	259050	480	NW	9.2	1136	Stagnosol	4.18
516	379138	2994.542857	13.23121618	8.5	6.642196759	0	144.4782572	9895.957143	1.087823638	4.609774987	7.840467287	0	130.9674481	12890.5	3.908808814	5.513498313	7.193586788	0	134.1060926	751520	259050	489	N	9.1	1194.2	Cambisol	5.21
517	379139	2957.652174	14.95116584	11.93198013	7.688880182	0	181.5929193	10664.78116	4.251157742	6.268350506	7.753419766	0	144.4427894	13622.43333	6.574303793	7.498016752	7.738569251	0	152.5086877	705725	232750	430		9.4	1447.3	Stagnosol	5.18
518	379140	2411.985714	25.95645992	15	7.64	0	184.6225809	9056.014286	9.950999111	19.77823893	7.732029172	0	157.7893138	11468	13.31731781	18.77326474	7.710987696	0	163.4329707	705680	232680	439	NE	9.4	1447.9	Stagnosol	5.12
519	379141	3166.925	23.35055498	35	5.551034212	0.204474754	265.0845519	12166.375	8.064424116	35	6.058809685	0	186.695054	15333.3	11.22160685	35	5.89493495	0.042232019	202.8855453	706490	233270	449	SSW	9.5	1477.2	Cambisol	4
520	379142	1228.8	33.26862466	23.5	7.417237151	0	324.4379431	2332.4	4.654133112	27.42717801	7.71655911	0	233.6616252	3561.2	14.52762722	26.07209648	7.588695463	0	264.9841961	706520	233280	451	SSW	9.5	1477.3	Calcisol	4.19
521	379143	3064.95	37.91029058	23.5	5.063913539	0.697577306	164.8332826	9978.75	7.507760306	17.58043092	5.564579865	0.109683724	90.5052936	13043.7	14.65161022	18.97138465	5.385826388	0.247824316	107.9705504	709440	230800	421	SSE	9.4	1511.6	Gleysol	3.66
522	379144	3328.125	45.82521388	11.81678911	3.662151567	67.3917746	86.94861752	13417.075	1.099610171	12.27517613	3.810124936	57.69297323	73.27202572	16745.2	9.988867979	12.18407126	3.776425728	59.62061956	75.99026182	709825	231120	469	S	9.4	1524.9	Cambisol	3.89
523	379145	3410.6	27.60585716	14.76787076	3.798348285	103.6845962	123.2150387	3863.9	3.6813	15	3.9	98.0461	110.1083	7274.5	14.8981664	14.89116778	3.849371069	100.6896707	116.2533056	709800	231230	490	S	9.3	1534.3	Cambisol	4.94
524	379146	2983.616667	59.18721911	10.22687091	3.549363414	74.86289581	92.61388746	11662.13627	2.833234093	6.502342948	4.251787351	23.17128688	28.97446516	14645.75294	14.31360589	7.261099684	3.990998598	33.70184455	41.93901822	711130	231910	480	NNW	9.3	1532.8	Planosol	4.11
525	379147	3051	21.2301688	16.6476434	3.94069356	46.26065196	86.48584355	12167.32727	6.390302166	36.75212462	5.153468159	0.454163035	179.5856729	15218.32727	9.365427638	32.72153892	4.543682388	9.637537476	160.9208371	709425	234330	521		9.2	1519.6	Luvisol	6.07
526	379148	1897.7	23.43305993	20.64286241	3.928555198	42.43375688	60.75972206	1855.2	4.499964155	21.3684185	4.259037625	32.14942412	123.2553344	3752.9	14.07371668	21.00153215	4.061308917	37.34982335	91.65366008	706750	233250	475	WNW	9.4	1462.2	Luvisol	3.78
527	379149	1383.77	17.67180255	23.03026876	5.817300777	0.019869632	183.2094355	1009.26	10.7575	23.5	7.55	0	248.3998	2393.03	14.75569661	23.22837783	6.049362506	0.011489618	210.7034608	706780	233180	470	S	9.4	1463.4	Cambisol	3.77
528	379150	2913.1	32.39682978	6.666707288	3.84119191	46.2559858	57.23759623	4759.5	4.058372678	6.784943797	4.338626108	26.56623788	29.91102153	7672.6	14.81779704	6.740052264	4.080014705	34.04195728	40.28625871	715580	232660	480	SW	9.2	1597.3	Cambisol	3.86
529	379151	3056.459091	35.19555735	19.61265004	5.871517729	0.091566928	143.7996285	7791.600909	3.536496834	13.40695702	6.041660144	0	97.68830926	10848.06	12.45649021	15.15542143	5.986615968	0.025799136	110.6802508	715610	232700	488		9.2	1597.2	Gleysol	4.36
530	379152	3119.038462	25.36134843	15	3.870389421	41.35287885	51.2102028	10618.26154	0.744877221	18.87029457	4.001566709	52.13744761	67.28712809	13737.3	6.334019229	17.99154856	3.968117611	49.68882344	63.63688035	715720	232800	500	SW	9.2	1601.7	Cambisol	5.16
531	379153	3478.166667	24.30844876	31.08878863	4.886901315	0.578435312	159.5650853	11411.23333	9.696886665	33.74204264	5.715001643	0	160.9233773	14889.4	13.11015034	33.122242	5.346001544	0.135122599	160.60608	721625	228465	490	E	9.3	1663	Cambisol	5.78
532	379154	3308.26	10.44430409	34.94527304	3.872588659	96.71313469	151.6164224	7164.81	3.359618818	38.51680652	4.22805428	70.65817962	191.4640005	10473.07	5.597547228	37.38862144	4.081849804	78.88848512	178.8768462	721570	228500	500	ESE	9.1	1688.9	Luvisol	5.68
533	379155	1119.884615	34.92369451	30.39914929	5.888957916	0.017599617	150.9312426	1156.361538	19.6859	31.55	6.99	0.1534	164.0011	2276.246154	27.18270416	30.98379586	6.162847434	0.086587911	157.5708938	721550	227890	473	SE	9	1687.7	Cambisol	4.69
534	379156	2647.311538	21.76805581	23.5	3.773776599	83.23770307	137.9316161	12864.32692	5.046100354	37.55169334	3.752656687	129.347957	239.2977857	15511.63846	7.899972028	35.15354501	3.756189229	121.4784977	221.9980123	714930	239925	964	W	7.2	1794.6	Luvisol	4.56
535	379157	2417.971429	22.6367046	23.5	4.597588117	5.799279321	130.2355498	8882.867033	5.772157178	30.19521362	5.539303392	0.475596152	242.0335665	11300.83846	9.380561454	28.76267962	5.114918621	1.614672146	218.1128273	714960	240000	988	W	7.2	1793.8	Luvisol	4.8
536	379158	3100.781818	19.7297788	21.00412946	3.320603607	116.397805	143.5461858	6854.818182	9.025603362	21.55852619	3.878352579	109.9728737	122.8613082	9955.6	12.35953729	21.38585319	3.61982556	111.9739897	129.3038423	715330	240325	981	NNE	7.1	1791.2	Podzol	4.67
537	379159	2826.9	16.36812963	20	7.456715319	0	209.2908018	6792	1.010100168	31.17248233	7.632703045	0	196.8470528	9618.9	5.523673807	27.88899978	7.573200214	0	200.5041481	716650	233330	500	NNW	9	1655.7	Calcisol	4.97
538	379160	1928.9	22.76755058	16.60497434	7.528583476	0	197.8210995	10616.2	7.407315153	10.74474294	7.568815846	0	161.8843331	12545.1	9.769062617	11.64579597	7.56238213	0	167.4098712	719500	229125	420		9.4	1626.1	Fluvisol	4.46
539	379161	2809.46	21.22621207	29.76676941	5.422081424	0.194934606	157.1204484	10011.80667	5.263816887	30.73995473	5.641188169	0.059789815	130.5092196	12821.26667	8.761576659	30.5267055	5.582843856	0.089403417	136.340405	718850	227030	515	NW	9	1696.2	Luvisol	4.53
540	379162	2495.9	13.64818736	26.59048439	4.402725584	14.15939119	65.9967835	4870.166667	5.233492844	39.56523391	5.050327129	3.947737524	185.8007329	7366.066667	8.084707339	35.16890154	4.714596795	7.407829257	145.2066559	719100	226870	524	SSE	9.1	1683.6	Luvisol	5.22
541	379163	2847.85	30.34568472	35.34199396	5.954746769	0	286.8796171	9421.25	7.866700926	33.6488319	6.083583968	0	228.280392	12269.1	13.08442464	34.04184129	6.050094867	0	241.8821887	715450	240210	1009	NE	7.2	1768.5	Cambisol	4.78
542	379164	2790.5	23.15823898	26.01833901	5.550045486	0.02511676	185.6394778	7455.5	6.017055597	27.70207565	5.867161224	0	161.7608157	10246	10.68546007	27.24350966	5.755595108	0.006840554	168.2641737	715500	240250	1007	NE	7.2	1768.3	Cambisol	4.91
543	379165	1529.888235	57.73260831	23.5	6.869113013	0.065145627	312.6060867	819.6117647	19.84281475	23.5	7.399494029	0.139472659	267.2514358	2349.5	44.51493622	23.5	6.991732425	0.091074254	296.7843351	715750	240200	1080	WSW	7	1829.7	Cambisol	3.3
544	379166	2521.5	23.78992583	35	4.887430183	2.427611529	243.2845015	12438.65	2.41418176	35	5.158610044	1.470120958	279.1437751	14960.15	6.017015867	35	5.099366056	1.631503863	273.0997743	715350	240460	1063	SSW	7.1	1794.2	Calcisol	5.84
545	379167	3027.583333	21.0519703	20	3.340364495	124.487153	209.7360183	12339.31667	1.695081136	43.92758108	4.674642742	5.77972045	299.555205	15366.9	5.508771277	39.2133742	3.970759393	29.16743328	281.8590481	742950	257760	755	SE	8.4	1416.5	Planosol	4.56
546	379168	2946.7	25.10100972	37.5	7.427598892	0.034878912	344.9780576	7109.82	0.737197718	35.1456366	7.656749328	0	303.8302746	10056.52	7.876132938	35.83549777	7.576258988	0.010220006	315.8871464	743120	258020	721	N	8.4	1412.8	Cambisol	5.27
547	379169	3290.793023	21.32441934	23.5	7.39567617	0	346.3977441	10506.94031	0.217371738	24.49867164	7.635526583	0	269.5862279	13797.73333	5.251454026	24.26048602	7.565184055	0	287.9059617	749060	260840	480	SSE	9.3	1071.5	Gleysol	5.88
548	379170	1188.8	31.48644976	15	7.651722781	0.179015983	225.1249994	1248.071429	4.223957707	10.25875351	7.846859443	0.213890816	143.4764006	2436.871429	17.52365427	12.57171666	7.740762552	0.196877525	183.3077405	749400	261080	475	S	9.3	1063.3	Calcisol	4.31
549	379171	2025.825	27.46004492	23.5	7.614296029	0.155115842	222.751754	5257.203571	7.690604068	21.4766538	7.789233606	0.114497444	182.763901	7283.028571	13.1896114	22.03946161	7.73310219	0.125795733	193.8868001	749325	261050	480	SSE	9.2	1091.6	Phaeozem	5.95
550	379172	2198.1	28.98762696	37.5	7.482326971	0.145573741	271.1683355	9060.8	2.49206048	37.5	7.712053375	0	194.5108408	11258.9	7.664848645	37.5	7.656632667	0.028420684	209.4768533	749800	261030	470	N	9.2	1107.5	Gleysol	5.68
551	379173	3039.2	18.96373906	15.47505923	7.562408911	0.17272373	206.6872682	9452.125	9.118357182	18.76116416	7.632250882	0.04772642	202.5571392	12491.325	11.51378638	17.96163888	7.614195887	0.078138872	203.5620197	749800	261100	467	N	9.2	1106.9	Gleysol	4
552	379174	3071.409677	43.10672413	15	3.477831361	78.34224109	105.6412095	11254.36175	3.75279107	11.27190638	3.846243314	45.73680829	62.73735544	14325.77143	12.1901762	12.07120035	3.736879146	52.72733179	71.93583478	756200	258900	672	NNW	8.7	1388.9	Cambisol	5.44
553	379175	2987.1	25.01519789	15	5.598607847	0.39955345	169.4090528	7871.066667	0	5.992108228	7.6755997	0.278458791	143.1629373	10858.16667	6.881723215	8.470194477	6.149634171	0.311772136	150.383288	756200	258940	662	NNW	8.7	1388.7	Stagnosol	4.96
554	379176	3215.85	24.43666866	7.057526781	3.712309101	45.43870497	59.84739257	13093.25	0.86372681	12.98594409	3.900860486	52.7551658	62.4867844	16309.1	5.511870794	11.81697089	3.856634638	51.31249634	61.96634561	756400	259025	660	NNW	8.6	1420.9	Luvisol	4.91
555	379177	3064.1	9.914636888	11.37145002	4.214165173	16.79754169	66.43557767	9075.6	3.05292522	15.82443475	5.054568861	1.236869691	107.9349677	12139.7	4.784843696	14.70048683	4.657424404	5.164434216	97.46038585	755960	257890	883	SE	7.9	1480.9	Luvisol	5.62
556	379178	3142	13.0211653	15.1519478	4.082432555	20.75698165	84.31831371	12768.425	2.929855144	17.36726564	5.093193638	0.761738284	93.47373708	15910.425	4.922692955	16.92978338	4.641887976	4.710410596	91.66571874	762560	258810	423	N	9.1	1332.5	Luvisol	6.1
557	379179	3128.833333	18.85182743	10.92995046	3.923799368	34.22668747	42.90552367	3660.666667	1.134723795	5.974964032	3.994941494	32.92908224	49.89134853	6789.5	9.299369853	8.258390898	3.960704392	33.52706302	46.672042	764420	257870	461	NW	9	1362.8	Cambisol	4.73
558	379180	3150.795652	11.72885991	15.93576157	3.846109454	40.06206471	73.00041163	4424.504348	3.71880533	16.9985372	4.505095307	7.541362342	111.4720448	7575.3	7.05042852	16.55649677	4.110503014	21.0677029	95.47053269	764590	257880	446	N	9.1	1324.1	Luvisol	4.97
559	379181	1907.96	16.72703021	15	4.188227199	27.65168403	60.62632657	1813.69	4.259753353	11.23892451	4.681034265	5.005456601	51.73476837	3721.65	10.65129086	13.16709658	4.362575507	16.61538663	56.29315978	764780	257630	478	NE	9.1	1347.5	Cambisol	5.37
560	379182	1827.266667	44.27562461	23.5	7.323918877	0.168716152	315.056048	167.6333333	34.755	23.5	7.45	0.333	297.2337	1994.9	43.47559752	23.5	7.333213069	0.182521079	313.5584192	765480	256750	514	SSE	9	1365.2	Regosol	5.49
561	379183	2831.771429	8.974645613	15	3.776261837	29.35009822	47.12426945	11878.95714	0.537196494	16.62289018	4.260485817	8.863800486	64.45253801	14710.72857	2.161380315	16.31048865	4.116062207	12.80735177	61.11689793	765150	256500	520	SSE	9.6	1356.1	Cambisol	5.2
562	379184	3080.136364	10.81016431	14.80427224	5.133744917	0.545180103	72.27840805	11000.83364	3.671273954	18.00927923	5.982686782	0.261420773	74.18614012	14080.97	5.232867778	17.30820121	5.616062098	0.323491599	73.768834	762350	253040	511	SSE	9.7	1433.7	Luvisol	5.89
563	379185	3239.65	10.38722433	21.03098714	4.296244749	11.60751568	92.4923574	6311.935714	3.4214253	15.78075783	5.208478834	0.851932081	112.7118155	9551.585714	5.78404356	17.56149936	4.672937289	4.499946919	105.8539	760610	252065	531	SSE	9.6	1470.7	Luvisol	6.55
564	379186	3515.5	13.16319087	39.59379747	4.551452517	9.83750844	209.0815601	2680.8	8.4036	51.45	5.74	0.1416	340.5133	6196.3	11.10397631	44.72332763	4.776656655	5.642619337	265.9448831	758875	251030	551	S	9.5	1499.7	Cambisol	6.16
565	379187	813.12	44.78699688	16.1599026	4.790406221	0.989177465	193.2484334	148.68	15.5	3.5	7.5	0	227.6504	961.8	40.25966199	14.20286962	4.863181394	0.836265315	198.5664666	757720	248650	535	SSE	8.9	1486	Regosol	4.11
566	379188	1680.485714	65.43118869	8.5	7.480908626	0.094466926	312.1508644	3376.314286	25.40081592	8.5	7.678820124	0	210.5217375	5056.8	38.70378807	8.5	7.60259995	0.031393435	244.2953287	757430	248760	559	SSE	8.9	1478.6	Kastanozem	4.61
567	379189	2451.125	21.49990219	15	4.926340298	1.900743843	92.88474966	5857.275	1.203745897	13.48654878	6.470664182	0.154223317	68.21312776	8308.4	7.191471102	13.93304367	5.427825491	0.669477773	75.49169273	756275	249575	790	N	8.2	1527.7	Gleysol	3.96
568	379190	2654.56	25.63166774	13.52612674	3.298116339	79.58270791	103.7607185	5318.84	3.991278952	13.93354942	4.136850136	28.75500381	119.5211027	7973.4	11.19594828	13.79790742	3.665021841	45.67691795	114.2740456	756175	249530	808	NNE	8.2	1528.3	Cambisol	4.14
569	379191	3111.405882	13.80867948	11.26349409	3.933262772	27.77271659	47.5181656	3042.294118	3.926087142	9.967194841	5.047496495	2.682809882	45.12241785	6153.7	8.922878657	10.62262379	4.197967645	15.36865471	46.33374496	764360	257630	519	N	9.1	1352.6	Cambisol	6.03
570	379192	2680.8	15.16550209	8.5	7.337498217	0	166.5808047	1377.9	8.318445678	5.519377313	7.485597723	0	141.8712514	4058.7	12.84097477	7.488099638	7.382338043	0	158.1920858	750800	258175	485		9.2	1177.1	Gleysol	4.33
571	379193	2711.1	8.863002792	4.516377116	7.560862419	0.028264524	136.0921528	2270.5	2.472553909	3.5	7.665292354	0	121.6193646	4981.6	5.950381508	4.053135539	7.605374128	0.015382196	129.4957851	750800	258150	485		9.2	1177.5	Stagnosol	2.05
572	379194	3054.1	45.84603096	26.07288563	3.474244645	128.2752938	170.5414488	11036.16	4.85722031	36.7687085	3.785700152	95.74257611	146.6533583	14090.26	13.74165016	34.45036146	3.696754711	102.7941261	151.8311632	747620	252050	905	W	7.8	1542.8	Planosol	4.31
573	379195	3435.290909	14.18539108	37.19260245	3.953891771	38.61140773	150.346795	11549.53409	1.73488609	53.40734655	4.970780299	2.656156338	230.0141702	14984.825	4.589180793	49.69009506	4.47189554	10.89894518	211.7503193	747750	251960	934	WSW	7.6	1554.5	Luvisol	5.28
574	379196	3115.2	17.52890751	23.5	3.699001627	103.1980215	176.8108317	3354.3	3.678353594	15	3.958275021	46.97132436	173.4491566	6469.5	10.34768593	19.09292836	3.814249584	74.04565885	175.0678737	747390	252960	805	NNE	8.2	1494.7	Cambisol	5.22
575	379197	3220	19.85590394	32.83694099	4.831838095	4.947659205	209.4937008	12366.1	2.203626697	31.9642555	5.416153885	0.605396669	223.840185	15586.1	5.850487216	32.14454739	5.215659139	1.50248352	220.8762826	747400	252825	825	NE	8.1	1499.7	Cambisol	4.32
576	379198	938.8346154	20.81774282	15	7.455729343	0	232.6300787	2416.665385	6.045760351	15	7.624160663	0	208.675743	3355.5	10.17881011	15	7.57010039	0	215.3779214	731800	254500	582	S	9	1241.5	Calcisol	4.48
577	127092	1401.2	150.20373	29.2062161	4.680034481	4.403238488	390.3577748	1051.3	70.23295688	46.42173499	7.202335504	0.037309122	481.9396094	2452.5	115.9230883	36.5859001	4.922165634	2.531719001	429.6156679	498000	145000	1230	NNW	5.6	1889.3	Phaeozem	4.21
578	117753	2360.933333	19.58002767	9.559292229	4.2250641	14.75997199	42.88815188	10150.39167	0.875089385	6.624939883	4.602448621	5.926429945	28.56045927	12511.325	4.404780469	7.178663031	4.501648473	7.593352024	31.26414789	514000	153000	715	ENE	8.2	1317	Cambisol	5.06
579	108009	839.6857143	184.9822835	29.80483855	7.140118902	0.169348647	575.9905928	526.4142857	171.649	30.65	7.35	0.119	566.3976	1366.1	179.8444232	30.13051387	7.209514486	0.149947251	572.2940197	514000	161000	1575	SSW	4.1	1819.9	Cambisol	2.51
580	108025	2582.92	14.96206464	13.36950196	4.754226418	2.416140745	73.08235361	9636.78	1.089030676	17.69810933	5.991456354	0.102552764	88.51237144	12219.7	4.02142156	16.78315671	5.344218039	0.59158381	85.25087552	522000	161000	660	WNW	8.4	1199.8	Luvisol	2.8
581	97767	1613.35	42.4504203	22.7357455	5.944372127	0.117734949	198.2253489	3438.9	9.076134608	24.32377214	7.550756185	0	208.9578157	5052.25	19.7336444	23.81666287	6.417798885	0.037596651	205.5305852	522000	169000	960	SE	6.9	1538.4	Calcisol	3.82
582	78028	916.775	209.4105901	13.49304628	7.206315229	0.143182335	756.4783767	2802.825	71.15204724	18.1939231	7.513290878	0.017981242	365.890995	3719.6	105.2288231	17.03529143	7.415247491	0.04883973	462.1596118	530000	185000	1055	NW	5.5	1471.5	Phaeozem	4.98
583	59061	1873.5	71.40252469	49.24737123	4.384998596	23.67168659	164.5730009	NA	NA	NA	NA	NA	NA	1873.5	71.40252469	49.24737123	4.384998596	23.67168659	164.5730009	530000	201000	1065		5.2	1524.4	Leptosol	2.38
584	97799	2789.666667	19.37506034	20.12024973	5.352277235	0.292524521	109.5256853	10610.93333	3.157867734	26.58992203	6.211914351	0.096594719	153.7000432	13400.6	6.533877886	25.24309956	5.850439904	0.137382358	144.5040569	538000	169000	647		8.4	1060.3	Luvisol	6.01
585	59077	897.66	112.9286402	46.4987278	6.002738531	0.237727144	409.5175997	127.94	99.3859	51.55	7.03	0.0573	448.4973	1025.6	111.2392309	47.12885628	6.054830005	0.215219491	414.3801805	538000	201000	1180	WNW	4.9	1516.6	Cambisol	4
586	68328	2437.6	45.55016883	48.89852929	6.750592012	0	366.1521688	7043.7	2.631575178	24.11768389	7.610473696	0	199.0875425	9481.3	13.66575445	30.48872887	7.194684357	0	242.0391138	546000	193000	682	N	8.4	1187.2	Calcisol	4.39
587	59093	804.375	92.9512674	21.93628283	7.54680087	0.099356494	349.7961668	902.325	62.11638688	21.26595462	7.736753948	0.05199611	297.9031939	1706.7	76.64899777	21.58188317	7.636872861	0.074317261	322.3605737	546000	201000	972	SW	7.7	1434.1	Calcisol	3.56
588	50781	3208.9	22.11733175	29.86918726	4.454591491	12.40945656	122.4516376	5255.888889	13.03751196	33.28901571	7.013619717	0.0168291	268.5178431	8464.788889	16.4795628	31.99259974	4.873892297	4.71472562	213.1458955	546000	209000	1110	NW	5.5	1509.3	Luvisol	3.31
589	147842	2575.875	28.69804144	24.04225603	4.56781149	7.867189578	93.70325361	7694.625	8.819723183	19.12152493	4.846007896	3.552160142	55.88926057	10270.5	13.80527043	20.35566039	4.757832117	4.634383641	65.37313374	554000	121000	1555	SE	4.2	1637.4	Cambisol	2.99
590	87835	3152.666667	14.82256926	13.12533147	3.915466078	30.66019645	41.68102951	13051.23333	1.117472934	13.69312274	4.018886511	27.08994682	46.74795972	16203.9	3.783966825	13.58265202	3.996741237	27.78458249	45.76212655	554000	177000	687	SW	8.3	1096.7	Cambisol	5.86
591	147858	2045.4	21.175	25.55	5.15	2.246	117.9872	6924.8	2.904800315	28.70442612	7.092940912	0	210.709082	8970.2	7.07080179	27.9851486	5.775571811	0.512136675	189.5664834	562000	121000	692	NE	9.4	1265	Luvisol	6.73
592	117849	2788.3	24.35134311	35.81134562	5.55268735	0.2145189	217.1397512	9251.3	10.09785381	34.90630938	6.314566683	0	236.5335581	12039.6	13.39887745	35.11591041	5.990928909	0.049681306	232.0420674	562000	153000	995	S	6.7	1641.5	Cambisol	3.42
593	87851	3047.5	18.70496118	18.44130599	4.045219678	31.48458572	76.68914312	11296.8	1.926086148	18.88848656	4.806598223	4.197864189	125.403697	14344.3	5.490820688	18.79348138	4.502543792	9.995029882	115.0541085	562000	177000	740	NW	8	1229.3	Luvisol	5.31
594	68360	3205.4	17.48221107	14.17930523	7.342378791	0.028200365	158.2468991	11150.4	2.565855564	11.84464593	7.598366267	0	141.385375	14355.8	5.896417841	12.36593467	7.526746292	0.00629665	145.1502596	562000	193000	475	W	9.7	965.2	Regosol	6.01
595	50813	1635.716667	62.75074832	39.6173665	7.377426558	0.044580459	411.586056	2889.583333	21.67494326	20.74953425	7.632950827	0	254.432495	4525.3	36.52221945	27.5695081	7.522514127	0.01611407	311.2372812	562000	209000	930	NW	7	1365.2	Phaeozem	4.52
596	157767	1804.075	13.23330377	13.45899076	3.932855984	20.48452555	47.3862913	7382.725	4.371125499	15.3236774	4.339660581	6.436256026	41.63118521	9186.8	6.111452301	14.95749608	4.22415354	9.195011179	42.76135491	570000	105000	850	E	8.7	1013.4	Luvisol	4.11
597	153407	1041.781633	77.55699681	6.795187013	3.925181549	35.55345642	92.36173896	5781.658367	24.85196123	16.58520495	3.434258656	29.65121065	48.22610709	6823.44	32.89880242	15.09049541	3.481648538	30.55234721	54.96459832	570000	113000	1042	WSW	7.9	1176.9	Cambisol	4.85
598	117865	1044.2	65.72187036	60.21399636	6.928224131	0.10944254	458.4488083	2941.1	25.56038839	46.72587807	7.519439439	0.105500326	390.9046624	3985.3	36.08321464	50.25993903	7.273879384	0.106533237	408.6020998	570000	153000	1045	ESE	7.2	1662.2	Calcisol	3.77
599	24552	589.5	226.1447782	34.01198473	6.746177585	0.265406107	646.8533959	2415.5	109.9627914	24.18445042	7.458811058	0.133179052	480.0778057	3005	132.7545655	26.11234775	7.19968516	0.159118436	512.794681	570000	241000	720	SSW	8.8	1298.9	Cambisol	3.98
600	11947	3543.55	13.22461656	39.10711786	4.480733763	9.277631349	154.2494896	3929.45	6.881311364	61.67459886	6.069689157	0.118475895	300.166074	7473	9.889182248	50.97354208	4.792555561	4.461567733	230.9752921	570000	257000	482	ESE	9.4	1169.4	Luvisol	6.41
601	153423	2351.828571	33.22823606	14.19568117	6.41993162	0.195700996	128.6572039	8931.487218	10.39189459	9.962036415	7.259052255	0.097777674	145.5901129	11283.31579	15.15176849	10.84447265	6.910618656	0.118188241	142.060716	578000	113000	1192	SSW	6.9	1083.1	Cambisol	3.19
602	127225	1646.0625	46.55486414	38.74962069	6.302932501	0.141169044	289.2943762	5545.8375	1.083507621	19.17085517	7.692693496	0.062673773	186.5362556	7191.9	11.49086796	23.65198974	6.887444001	0.080639557	210.0552546	578000	145000	1340	NNE	5.5	1664.9	Kastanozem	3.72
603	97879	2272.7	38.37633767	39.91029612	4.994663601	1.133729133	227.9305612	5972.233333	4.448851061	35.10333795	7.26	0.0678	237.3562	8244.933333	13.80089743	36.42836671	5.548157389	0.361621313	234.7580408	578000	169000	1200	NW	6	1635.3	Gleysol	3.08
604	50845	3335.6	12.48954041	12.96724877	3.981491695	26.79081159	40.82876912	11886.9	0.262960907	16.54781819	4.106275559	16.59576821	52.6931509	15222.5	2.942085794	15.76323304	4.075701404	18.82973679	50.09339187	578000	209000	555	N	9.3	1055.8	Luvisol	4.75
605	43646	1428.042857	58.76388668	39.38390204	6.423113792	0.130397812	341.1340833	3348.12381	31.97424976	38.03110754	7.076208859	0.104230154	319.747728	4776.166667	39.98417745	38.43558432	6.76527914	0.112054114	326.1421095	578000	217000	785	SSE	8.4	1337.8	Cambisol	3.32
606	37074	1179.1	65.16874702	42.14841829	7.261417049	0.103518743	363.108687	3418.9	10.27685957	16.68236129	7.607072079	0.085490611	204.5601959	4598	24.35320244	23.21281535	7.489158208	0.090113702	245.2179875	578000	225000	1112	NNW	5.9	1458.2	Cambisol	2.95
607	30784	2970.4	27.09689857	19.46393583	3.653441176	62.0033298	107.800382	6286.26	8.009310137	23.88610859	4.432108497	11.69458609	138.9143041	9256.66	14.13438902	22.46706307	4.016008171	27.83832393	128.9300556	578000	233000	1102	NNW	6	1483.2	Luvisol	3.14
608	18244	1467.933333	43.2628961	37.83669672	7.10325373	0.091666211	335.5945449	3471.766667	14.10009521	25.51757079	7.531297739	0.06569706	243.2559238	4939.7	22.7664206	29.17845213	7.355472915	0.073414327	270.696242	578000	249000	620	N	8.7	1218.5	Regosol	6.36
609	11963	3515.3	21.90532801	26.30930219	4.72723102	8.028714164	101.4814113	13370.34	0	28.19052388	4.69938955	12.71266101	114.3140987	16885.64	4.56031276	27.79888586	4.70504039	11.73754379	111.6425537	578000	257000	450	ENE	9.6	1123.1	Cambisol	4.9
610	153439	1928.585714	30.72194398	12.79126155	6.334951943	0.194623865	150.7165726	6862.414286	10.65670184	7.46943839	7.63513989	0.093781651	150.1367242	8791	15.05865149	8.636949721	6.922510727	0.115904601	150.2639325	586000	113000	1630	NW	3.9	881.1	Cambisol	4.24
611	147906	2287.333333	38.61994343	30.19227922	6.854445916	0.091432801	192.7972047	7576.966667	9.728858437	17.74379567	7.542748958	0.062264268	160.6715723	9864.3	16.42812161	20.63034934	7.264134823	0.069027866	168.1208621	586000	121000	1015	W	7.8	868.9	Calcisol	5.68
612	108153	2208.433333	28.83222254	43.18939444	5.240768009	0.397124924	225.0725874	5806.733333	4.958558405	43.56021343	6.880076655	0.014752033	279.8998683	8015.166667	11.53651216	43.45804101	5.775154904	0.120107925	264.7932087	586000	161000	1130	NNW	6.5	1689.1	Phaeozem	3.04
613	59173	3375.966667	12.674477	16.79673822	3.591209501	41.93522566	64.67546079	13190.06667	0.675732698	20.46557334	4.084866116	14.80580635	84.42189141	16566.03333	3.120938498	19.71790702	3.929134556	20.33446933	80.39779643	586000	201000	530	NNW	9.3	1057.3	Luvisol	4.27
614	37090	2702.6	44.89341843	42.38284615	5.99095037	0.045133938	297.2058158	3568.68	0	29	7.61	0	274.8415	6271.28	19.34676057	34.76732023	6.342952389	0.019450412	284.4793729	586000	225000	882	SW	7.1	1447.9	Cambisol	5.28
615	30800	902.3	85.65692887	51.23039455	7.132789992	0	524.7773527	3470.8	12.64388324	25.2361761	7.51109006	0	233.0938268	4373.1	27.70863618	30.59955295	7.40161712	0	293.2767738	586000	233000	845	SW	8.2	1409.1	Phaeozem	5.26
616	379406	1096.66	58.98263709	50.49821184	6.469614468	0	362.1847384	3248.54	6.721871667	33.14503315	7.477189323	0	262.0712553	4345.2	19.91166524	37.52470197	6.956592545	0	287.3383207	586000	241010	804	NNW	7.7	1345.5	Kastanozem	4.99
617	18260	3132.1	26.97288752	35.05872099	5.117406249	0.475556936	176.9058488	11273.2	4.714392086	46.70222075	6.960663582	0	262.7630115	14405.3	9.553988175	44.17061047	5.75822741	0.10339888	244.0953531	586000	249000	832	WNW	7.4	1364.9	Luvisol	4.44
618	153455	519.1363636	39.56813543	7.745784082	4.242591396	15.41280097	67.91658299	NA	NA	NA	NA	NA	NA	2853.45	16.46023773	5.80719918	4.694354422	5.158935038	38.53053665	594000	113000	2140	NW	1.3	1117.2	Podzol	2.8
619	87915	2698	45.07541251	39.36790215	5.98227248	0.033985174	255.9044168	8440.7	21.21615383	39.94906702	7.137596321	0	270.1358674	11138.7	26.99530938	39.8082981	6.512138814	0.00823184	266.6887458	594000	177000	1345	NNE	5.5	1576.9	Gleysol	3.86
620	50877	2397.5	42.56332951	15.93837748	3.680593644	49.54756936	78.23165117	7924.3	8.972836717	15.13790934	3.944151201	35.66248906	43.82018793	10321.8	16.77508114	15.32383838	3.867193109	38.88765134	51.81312357	594000	209000	640	NE	8.7	1147.7	Cambisol	5.13
621	30816	394.1	214.2050648	22.17057853	7.130062146	0.097919081	606.8520273	NA	NA	NA	NA	NA	NA	394.1	214.2050648	22.17057853	7.130062146	0.097919081	606.8520273	594000	233000	917	S	7.9	1476.2	Histosol	4.07
622	24600	1178.25	64.9895654	35.88017823	7.326765651	0	364.271061	3846.35	7.939837802	11.21855655	7.658400535	0	154.9120789	5024.6	21.3177866	17.00161505	7.555028341	0	204.005981	594000	241000	832	N	7.5	1400.6	Phaeozem	4.66
623	379407	689.68	92.63320462	71.08710561	6.885692036	0	499.8453425	1255.92	61.912	71.5	7.14	0	469.4602	1945.6	72.80211123	71.35363641	7.032054392	0	480.2311833	594000	249010	600	S	8.8	1204.8	Regosol	4.25
624	153471	1071.757143	17.1955547	12.43409488	5.325369668	0.262085646	79.55812655	4637.142857	4.86032329	6.666225508	5.521663828	0.217603414	43.25933881	5708.9	7.176071047	7.749053233	5.477407748	0.225954261	50.07387139	602000	113000	1802	W	2.8	772.3	Cambisol	2.49
625	108185	328.2	317.4117	47.9	6.55	0	800.4944	623.34	178.5433	34.9	7.13	0	656.7702	951.54	226.441033	39.38388927	6.836325038	0	706.3427691	602000	161000	1502	NNW	4.9	1511.2	Phaeozem	2.71
626	97927	1530.2	74.394	51.2	6.93	0	405.7728	5204.66	18.73290511	49.34484923	7.387408672	0	398.3282536	6734.86	31.37943487	49.76635045	7.233848392	0	400.0196985	602000	169000	1010	W	7.6	1466.2	Phaeozem	4.77
627	87931	2435.8	36.13944252	28.67500205	5.288610896	0.696939486	201.9472652	5696.8	11.53457641	38.92702219	7.288164979	0	261.4018087	8132.6	18.90399491	35.85643337	5.802148252	0.208740772	243.594542	602000	177000	1435	NE	5.1	1535.2	Gleysol	3.08
628	30832	1613.8	48.52652014	26.49159747	7.418349134	0	285.5317352	5771.8	9.329855009	24.95218389	7.486346204	0	220.7487723	7385.6	17.89457259	25.28855543	7.470552807	0	234.9042567	602000	233000	1075	NE	6.5	1706.2	Phaeozem	5.69
629	24616	1658.5	55.3879	34	7.45	0	280.84	4073.96	20.40939961	36.40255231	7.502146591	0.095194041	220.0665344	5732.46	30.52928582	35.7074523	7.486405309	0.067652755	237.649351	602000	241000	675	NW	8.5	1276.4	Kastanozem	5.32
630	18292	367.8	243.0055	11.75	6.98	0.1494	686.8763	2957.6	46.42328004	21.45009636	7.524913703	0.05398042	442.9104525	3325.4	68.16590965	20.37723432	7.418633505	0.064534134	469.8938646	602000	249000	595	SSE	8.8	1209.9	Kastanozem	5.57
631	153487	1435.8	74.18599596	7.320006268	3.906330011	73.10633372	220.5821528	4631.22	11.3	3	4.31	31.1352	50.1382	6067.02	26.18238262	4.022357764	4.175554325	41.06794355	90.47487721	610000	113000	1635	E	3.8	811.8	Umbrisol	2.21
632	147954	1591.1	39.24	9.75	5.66	0.6556	226.1298	4863.1	9.683257387	7.614476363	6.664646546	0.046570868	163.5152711	6454.2	16.96963419	8.140929162	6.153403483	0.196709732	178.9511077	610000	121000	985	ENE	7.3	761.6	Cambisol	3.94
633	97943	1439.3	47.92328456	21.68965469	7.525532992	0.065711874	473.5758961	3327.65	11.93927456	22.1617275	7.742975627	0	445.3727053	4766.95	22.80403832	22.01919309	7.665168513	0.01984059	453.8881822	610000	169000	1040	SE	7.6	1354.1	Kastanozem	2.57
634	50909	2677.204762	25.80440171	10.19537017	3.825250681	62.45385323	80.28511929	11648.99524	1.808640353	7.794689119	4.122498048	43.92024415	93.53318422	14326.2	6.292841786	8.243315743	4.049280773	47.38370735	91.05745566	610000	209000	602	W	8.9	1147.5	Stagnosol	4.41
635	18308	2755.9	75.950889	47.23742697	7.355092424	0	515.8466713	7997.9	12.50688718	30.91331162	7.659385126	0	278.9096446	10753.8	28.7658212	35.0967286	7.558967268	0	339.630018	610000	249000	570	NNW	8.9	1207.7	Kastanozem	6.19
636	11986	2375.35	35.00034911	45.30622224	5.738280049	0.11430121	309.3514898	7517.45	8.05525282	47.66990402	7.062404941	0	310.6167871	9892.8	14.52501209	47.10236283	6.297157288	0.027444746	310.3129779	610000	257000	395	N	9.8	1003.3	Regosol	6.23
637	87963	2139.333333	28.87920444	15.15018386	4.859779971	5.904509131	86.37796234	3964.866667	6.613048947	13.0804365	5.86346938	0.028810946	80.84472868	6104.2	14.41664789	13.80581894	5.241865095	2.088061459	82.78395597	618000	177000	950	W	7.9	1293	Cambisol	3.8
638	50925	2109.5	31.32216923	11.78194596	3.775026766	34.2155038	65.35118543	8421.26	1.001990194	11.78418372	4.290315263	8.446031869	51.20391511	10530.76	7.075665568	11.78373546	4.127201646	13.60811903	54.03786696	618000	209000	697	SSE	9.1	1250.8	Planosol	4.91
639	30864	2954.9	20.45672604	15.9376544	4.410338579	10.33788761	57.42023796	10278.36667	5.816252907	17.05247186	5.016670098	3.522674162	43.07990373	13233.26667	9.085372706	16.80354057	4.791694899	5.044465774	46.28200452	618000	233000	452	N	9	1188.6	Cambisol	3.79
640	12002	1185.8	91.64410019	54.61582054	6.695127338	0	457.8428785	291.4	67.1012	49.6	7.3	0	464.8602	1477.2	86.80264262	53.62637422	6.764823957	0	459.2271511	618000	257000	635	SWSE	8.6	1164	Phaeozem	3.77
641	161130	1635.585714	16.26913305	7.008715096	3.8644819	20.48996878	40.88760875	5463.414286	5.117162476	13.13177474	5.433930748	0.960045696	36.72905579	7099	7.686538973	11.7210424	4.464571056	5.459674264	37.6871724	626000	97000	2207	WNW	1	1200	Podzol	2.53
642	135430	1065.05	31.36788109	6.698983616	4.029052129	11.07396463	33.5136895	2905.516667	10.32056057	6.654701401	4.715850263	2.699097574	16.61242389	3970.566667	15.96621536	6.666579497	4.40709852	4.945540689	21.14595637	626000	137000	2065	N	1.8	1211.7	Cambisol	2.76
643	78220	2934.95	12.99461844	29.80500946	3.710215668	155.4492596	237.8548843	9351.75	3.566616031	28.7167752	4.655079661	16.75245104	238.3450087	12286.7	5.818702895	28.97672402	4.197947612	49.88325088	238.2279316	626000	185000	1010	N	6.8	1470.1	Cambisol	3.6
644	50941	1742.916667	21.18992579	12.49449199	3.838205079	48.40643725	58.5546334	7858.162644	0.662832001	12.82148276	4.039932884	68.5791195	77.82105853	9601.07931	4.389185334	12.76212301	3.995657948	64.9171037	74.32355868	626000	209000	807	N	7.9	1429.6	Planosol	3.61
645	43742	2499.685714	32.77299781	14.08029981	3.341036558	62.29898163	84.49199145	10448.97744	3.838162845	10.37118049	4.091725631	28.61919121	31.83695014	12948.66316	9.423912718	11.08721059	3.814287293	35.12093505	42.00178747	626000	217000	762	N	8.4	1342.4	Cambisol	3.5
646	37170	2437.4125	22.89080722	16.17422343	3.552214105	52.83481945	72.90329806	9154.0475	5.050383185	15.96155281	3.904060472	34.46504488	43.58631875	11591.46	8.801806435	16.00627246	3.802836084	38.32777815	49.75099273	626000	225000	555	N	8.8	1192.5	Cambisol	6.23
647	18340	476.475	174.4303	35.2	7.27	0.0848	581.4656	2371.725	88.53369969	31.15393016	7.529893802	0.005678719	427.9557263	2848.2	102.9033306	31.83079664	7.474113011	0.018914908	453.6363727	626000	249000	702	W	8.5	1247.2	Phaeozem	3.72
648	6711	2790.7	21.5029498	15.19425771	3.568989034	38.91129179	57.0087502	6737.4	1.880730697	21.22351426	3.716393407	55.33712384	70.41048555	9528.1	7.62791291	19.45759595	3.667810432	50.52613639	66.48523048	626000	265000	400	N	9.7	1030.1	Luvisol	6.11
649	148002	926.2	30.12712132	8.732951846	7.224859218	0.322000551	184.0799056	NA	NA	NA	NA	NA	NA	NA	NA	NA	NA	NA	NA	634000	121000	885	WSW	8	639.2	Kastanozem	4.03
650	142215	2270.407407	25.22337838	14.46489405	4.43409504	7.778810238	112.6760495	5424.792593	12.04901308	9.087688896	4.477982115	4.705504426	62.50047466	7695.2	15.93600452	10.6741904	4.4645661	5.612258803	77.30437797	634000	129000	1017	NNW	7.6	782.8	Phaeozem	3.46
651	24680	1131.9	63.284094	34.21149837	7.034394635	0.100104727	453.2926967	3357.1	11.99308927	20.38447172	7.617917864	0	351.1730827	4489	24.92610069	23.87095233	7.38382967	0.025241377	376.9225127	634000	241000	537	SE	9.6	1164.7	Kastanozem	5.18
652	6727	2480.4	28.43155265	34.3116836	7.442934062	0.067028084	507.2203437	3218.6	9.6951	23.5	7.63	0	389.2482	5699	17.84984595	28.20561502	7.538570481	0.029172918	440.5937177	634000	265000	427	S	9.6	1083.4	Calcisol	5.13
653	108265	334.4528302	115.6350755	21.96866439	4.325393779	45.67122784	288.0652336	236.5471698	78.6967	21.9	4.33	52.8955	225.6542	571	100.3326794	21.94021891	4.327296066	48.66401441	262.210324	642000	161000	1650	NW	3.7	1534.9	Leptosol	3.55
654	68520	385.215493	78.48350863	3.874959141	2.980458934	50.90921167	130.8170729	909.0633803	41.92	4.15	2.96	46.4552	91.0768	1294.278873	52.8023765	4.068139744	2.965989088	47.78084499	102.9046751	642000	193000	1457	NNW	4.6	1719.9	Umbrisol	2.95
655	59285	2218.468421	21.36532518	11.3518187	3.667951377	110.6428029	129.3920182	7743.798246	6.255742803	12.23739144	4.171589777	94.43814229	100.8010167	9962.266667	9.620452109	12.0401858	3.999151565	98.0467114	107.1678643	642000	201000	965	W	7.7	1659.1	Stagnosol	5.51
656	30912	2448.5	19.78420598	18.76979375	3.716262703	116.8102814	147.3574361	9638.4	0.691014691	8.548246597	3.954338533	56.4521005	90.95126647	12086.9	4.558811964	10.61887333	3.894433148	68.67914019	102.3777287	642000	233000	550	NE	9.1	1175.2	Cambisol	5.91
657	18372	2464.421212	22.13142818	14.08961339	3.688431395	49.30440524	64.68697326	7890.012121	3.70986911	28.07702335	3.751125823	142.3406162	162.728049	10354.43333	8.094317729	24.74793052	3.735362909	120.1974042	139.3936473	642000	249000	450	ESE	9.3	1077.1	Luvisol	4.46
658	6743	1782.45	32.70320753	22.62769923	7.381747909	0.053187585	243.4162503	4601.45	3.269281844	19.83128307	7.502865347	0	193.7789872	6383.9	11.48753414	20.61207099	7.46551504	0.014850516	207.6382174	642000	265000	322	S	9.9	1099	Cambisol	4.37
659	135478	2264.357143	16.23329468	6.763966752	4.414517465	4.484787298	65.79287102	8651.342857	2.118206918	6.220712722	4.565191335	2.54482159	52.49462004	10915.7	5.046246328	6.333405553	4.529348728	2.947248847	55.25321451	650000	137000	1110	S	6.4	1029.3	Cambisol	2.86
660	50989	2737.933333	43.36340479	11.83133324	3.431787636	61.13882551	81.62687061	10891.34667	2.862932126	12.07720692	3.897947787	40.9196733	46.86408472	13629.28	10.9989154	12.02781431	3.755948928	44.98142057	53.8474463	650000	209000	905	SW	7.3	1612.1	Stagnosol	4.3
661	30928	2607.6	16.29612016	19.45798819	3.65987775	40.05677966	54.20726496	10859.25714	4.450477844	27.52474071	3.862836531	39.62012256	65.05901832	13466.85714	6.744160517	25.96276796	3.815424852	39.70467288	62.95778328	650000	233000	815	S	8	1330.5	Planosol	5.07
662	12066	2666.9	51.46386907	51.23506318	7.191266037	0	381.0941716	8389.7	4.011817384	33.22788598	7.4248558	0	217.0891533	11056.6	15.4574586	37.57129543	7.355995161	0	256.6478769	650000	257000	585	ENE	8.9	1152.2	Phaeozem	6.37
663	127385	1706.0625	14.30869092	4.529911346	3.809296179	35.12030292	44.60357012	5194.204167	6.851278468	2.355859415	4.530168884	23.06243549	26.01854397	6900.266667	8.695092967	2.893384797	4.217794956	26.04369352	30.61361511	658000	145000	1820	NE	3.2	1719.7	Podzol	2.88
664	78284	2039.988889	50.9645716	31.89153617	6.929989152	0	332.9888624	6875.444444	33.06161307	27.44869423	7.327491134	0	336.1491175	8915.433333	37.15808658	28.4652851	7.199529447	0	335.4260023	658000	185000	1760	W	3	1806.9	Phaeozem	2.92
665	59317	2653.333333	49.4480402	41.1658794	5.338920422	0.822689045	277.842819	2289.966667	14.12678959	43.94688642	5.811750223	0.218077883	228.7562314	4943.3	33.08559274	42.4541713	5.498373744	0.542605011	255.1036267	658000	201000	1280	ENE	5.5	1765.7	Gleysol	3.99
666	51005	3026.766667	25.57014342	13.82275365	3.582471042	45.04958155	60.8052948	10654.05833	3.209393729	12.24349031	3.912851357	27.0373875	34.92019363	13680.825	8.156520223	12.59288895	3.815184986	31.02243289	40.64705304	658000	209000	790	NNE	7.9	1475.2	Cambisol	3.6
667	78300	504.325	133.8378581	42.02248798	7.359319207	0.453756214	559.9490482	2775.675	40.2448529	29.70012294	7.652369886	0.267196382	367.2605098	3280	54.63549082	31.59478049	7.59236777	0.295881378	396.8878413	666000	185000	1630	SSW	3.9	1778.1	Kastanozem	NA
668	68568	2509.6	48.3772	46.7	6.26	0.2346	274.8353	7826.5	12.27598543	36.90165527	7.358061564	0.216257593	256.6091368	10336.1	21.04134258	39.28068856	6.778249117	0.22071112	261.0344402	666000	193000	1037	W	6.2	1710.8	Phaeozem	4.72
669	18420	2058.92	26.30441008	11.07579556	3.866041062	27.96345724	47.69479293	9062.868889	2.269327468	10.20464518	4.596039855	7.960620916	95.83810821	11121.78889	6.718819612	10.3659168	4.338588831	11.66364389	86.92558202	666000	249000	370	W	9.6	1093	Luvisol	3.22
670	78316	2604.684848	27.96476319	20.58444132	3.535308145	57.34744642	81.05895782	9597.495152	6.42646835	16.56643469	4.172998117	16.09239435	34.69043452	12202.18	11.02404601	17.42412085	3.939142978	24.89872314	44.58828802	674000	185000	1207	NW	5.4	1673.9	Cambisol	4.67
671	59349	2693.133333	31.66936808	33.44481026	4.807567645	1.568448259	171.541015	6482.266667	6.853380232	30.61125944	5.916674722	0.147018923	199.6569392	9175.4	14.13728765	31.44295399	5.265402059	0.564232202	191.4044453	674000	201000	740	NNW	7.9	1569.6	Cambisol	3.62
672	12114	2745.966667	33.733756	24.64234878	7.228522685	0.640008349	247.0368977	10296.25333	3.839461292	15.05110176	7.768302661	0.017346666	155.3666598	13042.22	10.13353828	17.07048532	7.586710318	0.14844461	174.667317	674000	257000	470	S	9.3	1113.5	Cambisol	6.22
673	108345	1377.421429	48.81254712	6.115050638	3.936902043	32.38842164	44.65796042	5744.278571	25.92792415	2.829650932	4.399072502	16.9676846	20.82736349	7121.7	30.35408224	3.465086286	4.263244013	19.95023843	25.43648418	682000	161000	1695	NNW	3.7	1646.7	Podzol	NA
674	68600	1135.86	98.0271	37.65	6.36	0.2821	355.0346	2753.606667	63.772303	32.01492685	6.803911458	0.255275239	313.454192	3889.466667	73.77589913	33.66056486	6.622189919	0.263109006	325.5971222	682000	193000	1237	ESE	5.3	1722	Phaeozem	5.01
675	51053	3004.633333	29.98714676	34.05333263	5.85083941	0.252934675	235.5293961	892.8666667	16.1556	26.05	6.71	0.1901	234.2051	3897.5	26.81851891	32.219873	5.946341894	0.238540067	235.2260171	682000	209000	1625	NW	3.9	2164.6	Phaeozem	2.78
676	1178	1586.9	49.74008335	59.02632806	6.800579669	0.279230928	392.4554135	2089.3	6.117022788	36.35248409	7.582481775	0.211056512	289.2080128	3676.2	24.947727	46.14006991	7.079944212	0.240485265	333.7766707	682000	281000	555	NNE	8.8	959.4	Phaeozem	NA
677	290	966.495	63.88206069	45.05975665	7.218869731	0.253591976	398.2177861	2502.805	3.911345448	18.70349088	7.79212302	0.12665306	194.8759553	3469.3	20.61828818	26.04595163	7.54556559	0.16201634	251.5239427	682000	289000	655	S	8.6	955.2	Kastanozem	4.62
678	148060	1318.5	99.52906257	7.283519151	3.621460183	44.01679342	70.21675113	3263.4	25.74378317	2.483881841	4.944830806	7.440324251	10.00454031	4581.9	46.97643576	3.865038521	4.114159016	17.96566845	27.33136979	690000	121000	1332	SE	6	1877.6	Podzol	3.77
679	88107	870.4	83.09528378	8.931037454	3.415544012	91.57313603	121.1488363	1517.8	24.73315325	4.166402029	4.224788644	26.90286146	31.91811867	2388.2	46.00373294	5.902914329	3.749903318	50.47249842	64.43902003	690000	177000	1355	ENE	5.1	1607	Umbrisol	4.14
680	51069	158.3769231	162.3757318	42.76504444	6.403013789	0.693237112	664.7696898	414.6230769	85.48533599	50.45442478	7.404449525	0.080424779	546.6186519	573	106.7378042	48.32908377	6.860785155	0.249805812	579.2755417	690000	209000	650	ESE	8.1	1814	Cambisol	4.23
681	43870	3128.325	25.2224	36.7	6.61	0.1689	275.1014	11619.675	3.84066618	24.91366863	7.297681219	0.160452976	247.922081	14748	8.37612946	27.41376865	7.037308989	0.162244747	253.6873199	690000	217000	815	NE	7.8	1810.3	Kastanozem	5.75
682	3082	2945.4	18.59062722	12.47309364	3.753313719	35.88709833	54.77015561	10190.8	2.041132198	23.28452771	3.693972447	55.89526078	85.0919301	13136.2	5.751861529	20.86038695	3.706590499	51.40902871	78.29317897	690000	273000	410	E	9.4	925	Luvisol	4.53
683	1194	2993.39	14.51751509	21.58525167	4.146171607	17.24979898	94.34068781	8054.19	1.369134326	24.91862366	4.860071328	3.185486164	174.4503777	11047.58	4.931745459	24.01543198	4.531447093	6.996273082	152.7443077	690000	281000	540	NNE	9	937.2	Luvisol	5.33
684	148076	1340.468421	35.31154573	1.994710608	4.430048897	5.858320673	72.34881298	2700.498246	2.835460357	0.820871392	4.602453907	1.897093049	14.74566083	4040.966667	13.60841903	1.210257034	4.537376989	3.211110455	33.85376361	698000	121000	357	E	11.3	1902.3	Regosol	5.58
685	118121	1860.828571	29.95959864	7.074101783	4.08273137	22.44810061	35.12977461	6556.171429	7.807937385	2.32197319	4.863375495	5.246202302	8.353464122	8417	12.70522195	3.372572769	4.538468826	9.049194326	14.27316516	698000	153000	1595	SW	4.8	1782.4	Podzol	4.85
686	68632	2063.533333	41.37183874	43.43481003	6.571893338	0.150310684	222.9699769	NA	NA	NA	NA	NA	NA	5448.4	19.80378615	32.85769676	6.931004567	0.133741884	200.5751329	698000	193000	1237	SW	6.4	1987.9	Phaeozem	3.36
687	18484	2315.4	28.91581469	19.78471107	7.112902646	0.14247958	206.9086374	NA	NA	NA	NA	NA	NA	8763	8.56209774	11.4510784	7.477994666	0.127254536	168.1826513	698000	249000	520	N	9.1	1246.5	Cambisol	3.18
688	12162	3074.766667	22.52279154	52.19305259	5.096756108	2.70852709	336.8215536	7370.733333	7.715038133	34.93978754	5.528131262	1.159578262	298.9523041	10445.5	12.07388994	40.01850701	5.35191332	1.615531182	310.0996026	698000	257000	522	ENE	9	1186.5	Cambisol	4.86
689	161168	1402.2	73.51904579	11.56938383	4.214312364	29.48638174	39.90777254	2535.8	15.64807161	3.894528354	4.965607485	13.09256042	18.56421012	3938	36.2541356	6.627307009	4.541995556	18.92989314	26.16399255	706000	97000	707	WSW	10.2	1983.3	Podzol	3.16
690	142324	2328.833333	38.02253632	8.498163601	4.097576041	24.26927091	31.24688243	5127.366667	51.96661158	4.009462297	4.448217223	19.98889726	21.98807172	7456.2	47.61138677	5.411441485	4.305849897	21.3258084	24.87992374	706000	129000	1560	W	4.9	1696.6	Podzol	2.6
691	127469	916.0727273	44.54953085	10.40111196	4.098682996	27.42977811	46.01528825	2292.327273	26.09143161	3.353212297	4.43	16.25816244	21.08142249	3208.4	31.36164771	5.365551365	4.307204821	19.44791821	28.20062034	706000	145000	1185	N	5.7	1672.2	Cambisol	4.52
692	98135	2092.05	32.83204608	4.797553835	3.370981375	54.17980832	70.62057192	4117.25	18.85841083	4.169725545	4.210499591	16.00167115	19.95026177	6209.3	23.56643647	4.381254731	3.734621534	28.86472687	37.02220584	706000	169000	1787	N	2.7	1472.5	Podzol	3.28
693	59413	1385.44	71.68117456	46.61403958	7.446616378	0.253550852	398.014779	5071.56	28.8047366	35.64034735	7.668067339	0.19349911	297.2489407	6457	38.0044783	37.99490708	7.610129299	0.206384055	318.869666	706000	201000	1047	WSW	6.8	2087.2	Regosol	3.93
694	31040	3504.261538	16.07555903	35.1293378	3.557594877	159.3178172	241.9125147	8358.738462	2.89306824	34.83218539	3.856396052	121.8297236	266.7545259	11863	6.787099722	34.91996249	3.745009176	132.9034895	259.4163396	706000	233000	440	NNE	9.5	1469.2	Luvisol	6.14
695	24824	2506.8	23.23708587	23.87168502	5.579623422	0.966136844	190.9366632	5106.6	4.754025888	17.41415619	7.48697369	0.255976425	199.0985481	7613.4	10.83978715	19.54037224	6.05126736	0.489804956	196.4111531	706000	241000	635	SW	8.7	1443.6	Cambisol	3.72
696	12178	3435.185714	31.11740237	28.96792958	7.219203378	0.737931514	267.9999067	9441.714286	4.687390177	23.7195911	7.462514048	0.618645271	221.9644643	12876.9	11.73815553	25.11969651	7.383198362	0.650467402	234.2453932	706000	257000	712	W	8.3	1463.9	Phaeozem	4.29
697	163742	366.68	174.5482442	20.05433893	3.994737604	60.47129037	84.28223213	2148.32	46.79588087	7.116430513	4.670635893	20.43186685	24.04405412	2515	65.42181988	9.002741551	4.481574615	26.26950336	32.82661282	714000	89000	360	WNW	10.4	1710.6	Cambisol	3.44
698	157933	1654.95	82.51185293	4.023700112	4.098793382	37.75400404	48.11641578	5503.275	30.17209652	5.423960278	4.798512496	15.36803947	18.28704301	7158.225	42.272817	5.100226313	4.51368082	20.54357559	25.18346223	714000	105000	487	ENE	10.2	2085	Cambisol	3.26
699	127485	1340.1	57.59877126	20.17504291	7.154805285	0.168005656	216.4429361	NA	NA	NA	NA	NA	NA	1340.1	57.59877126	20.17504291	7.154805285	0.168005656	216.4429361	714000	145000	965	ENE	6.8	1582.6	Cambisol	4.06
700	118153	1733.7	41.36082136	4.857013901	3.841777311	25.05847157	36.20876251	5153.4	7.393667482	2.476772616	4.708974651	6.042466015	7.333558924	6887.1	15.94427001	3.07595432	4.293604613	10.82939358	14.60235718	714000	153000	1265	NNE	5.2	1664.4	Cambisol	3.28
701	37346	2560.5	26.57317801	27.59480375	7.006040873	0.173838137	262.6656463	9459.55	6.116175397	22.81992008	7.570000324	0.154118611	223.3491771	12020.05	10.47390729	23.83706141	7.374795547	0.158319246	231.7243352	714000	225000	602	N	8.9	1785.3	Cambisol	5.39
702	24840	2458.9	43.13463596	29.97853715	6.451484883	0.18334672	230.0242447	NA	NA	NA	NA	NA	NA	2458.9	43.13463596	29.97853715	6.451484883	0.18334672	230.0242447	714000	241000	1107	SE	6.9	1890.5	Cambisol	4.74
703	18516	3435.2	20.68771881	21.33713321	5.62796734	0.186158512	205.0685393	8261.7	5.11	32.55	5.6	0.3536	272.6792	11696.9	9.684936918	29.25695312	5.608028452	0.304425005	252.8229867	714000	249000	910	NNE	7.6	1617.4	Luvisol	4.17
704	164999	984.9	40.08283684	26.4856686	4.170657963	17.86053682	114.7574363	621.4	25.665	27.15	4.01	27.2609	95.0334	1606.3	34.50527112	26.74266638	4.10129814	21.49708396	107.1271579	722000	81000	655	SSW	10.5	1699.3	Cambisol	2.27
705	161200	1541.4	54.51943556	34.44380109	5.853359995	0.795692007	255.8994418	4178	21.19912876	39.13322044	6.937602118	0.708106199	238.447519	5719.4	30.17907786	37.86940413	6.33527633	0.731710907	243.1508784	722000	97000	332	SSE	11.9	1581.3	Cambisol	4.1
706	157949	1246.6	93.78444088	10.92028317	4.063677389	32.12736442	46.28250324	3947.766667	7.241645487	6.32270482	4.663157918	10.43746045	14.37033355	5194.366667	28.01111666	7.426081139	4.429074249	15.64283697	22.02895938	722000	105000	932	ESE	8.7	2028.4	Cambisol	4.93
707	153645	1420.25	88.9299736	2.038838233	4.302648583	31.11021866	41.5963203	4872.2	21.58529617	3.359288925	4.827619329	9.193405816	10.75650798	6292.45	36.78546115	3.061253963	4.642847713	14.14018385	17.71726944	722000	113000	715	NNW	9.5	1920.7	Cambisol	4.99
708	148124	1523.2	96.92761949	7.844061843	3.979258393	29.64462977	45.0862857	1310.3	59.65	5.25	4.39	18.097	22.9114	2833.5	79.68926945	6.644485618	4.123637365	24.30464061	34.83191735	722000	121000	327	NE	11	1672.6	Cambisol	4.19
709	88171	1330.0125	18.27237434	4.293586996	3.135866707	65.03234226	89.30857153	908.9875	16.65202904	3.106908098	4.267447422	24.57596306	31.20401564	2239	17.6145478	3.811820009	3.340677187	48.60789251	65.71932856	722000	177000	1485	NNW	3.6	1251.4	Podzol	2.92
710	78412	1207.684615	25.27228158	7.198330244	3.274482032	26.84950033	47.08066385	1496.215385	21.4462439	3.832621537	4.23349427	16.35109998	21.67763514	2703.9	23.1551262	5.335899996	3.56908217	21.04016266	33.02378217	722000	185000	1690	NE	2.9	1354.3	Podzol	3.16
711	59445	2095.3	42.16963412	26.84574524	3.966394657	31.58269733	80.31135982	7783.65	12.435	29.15	4.03	29.3576	53.0689	9878.95	18.74163976	28.66127347	4.015709257	29.82953745	58.84695597	722000	201000	985	W	6.3	1929.2	Cambisol	2.92
712	43934	883.6525	46.19264128	13.54871938	7.433378826	0.199013838	271.0101803	NA	NA	NA	NA	NA	NA	NA	NA	NA	NA	NA	NA	722000	217000	840	N	7.8	1887.6	Cambisol	3.13
713	31072	2204.4	51.17622698	34.74752314	7.426202758	0.229629741	324.5784668	9153.3	2.423100469	25.24421247	7.768335704	0.437631956	227.2119673	11357.7	11.88552614	27.08869666	7.677505951	0.397261099	246.1096941	722000	233000	895	SE	8.3	1809.5	Calcisol	4.04
714	148140	1847.4	70.43224207	11.03376367	4.215703535	33.94687448	49.19059125	5557.9	19.54638676	5.415683082	4.846917098	10.59784346	14.29201722	7405.3	32.24087978	6.817225501	4.58739592	16.42272562	22.99816359	730000	121000	412	NNW	10.8	1599.5	Umbrisol	2.36
715	142372	1814.7	61.34989888	10.98221745	4.122430745	33.22725549	45.42453042	5458.7	16.66696888	3.428096433	4.626892481	10.65437547	13.79783188	7273.4	27.81527821	5.312835813	4.437224854	16.28626776	21.68863533	730000	129000	1405	SW	5.2	1675	Umbrisol	3.39
716	78428	2044.2	24.47569612	7.267938558	3.871394086	26.75146476	41.12707792	4301.8	6.48059417	2.633041982	4.515159324	6.086994667	8.187668643	6346	12.2772515	4.126054207	4.193717778	12.74352	18.79824861	730000	185000	1742	SE	3.2	1442.4	Cambisol	3.57
717	31088	3322.85	36.73111305	57.05660126	4.85097001	10.02038058	281.1287484	11124.55	5.763596011	23.13777119	5.554659233	2.841784943	213.9932692	14447.4	12.88601347	30.93898002	5.268528514	4.492836101	229.4341878	730000	233000	940	E	7.3	1860.6	Cambisol	6.25
718	18548	2590.04	47.2179926	17.72382357	7.14084632	0.208463872	276.423438	3010.96	4.620837743	14.91489027	7.539866047	0.173972827	218.4249344	5601	24.31880863	16.21381003	7.310308456	0.189922334	245.2448673	730000	249000	782	ESE	8.1	1475.9	Cambisol	4.31
719	142388	1444.45	65.10404825	7.079909308	3.341465776	29.32841741	62.63368716	3718.15	29.29572516	4.179339187	4.316105492	19.55945438	22.2339637	5162.6	39.31457851	4.990893155	3.789841497	22.29272418	33.53745042	738000	129000	1770	E	3.2	1636.3	Podzol	2.06
720	135630	702.5333333	61.27482919	6.292878155	3.768261634	33.83838384	74.95950386	1036.05	15.42580828	4.794540965	4.530744246	10.61312694	28.38551637	1738.583333	33.95265417	5.399994728	4.063209255	19.99807665	47.20530951	738000	137000	932	WNW	8.2	1516	Umbrisol	3.14
721	88203	2673.322222	26.8896189	10.95050935	5.834706334	0.452125488	120.4088871	6615.777778	12.4121	10.35	6.66	0.2783	105.1551	9289.1	16.57860407	10.52282137	6.238898857	0.328325464	109.5450073	738000	177000	1370	N	4.1	1148.3	Cambisol	2.99
722	43966	735.86	67.12975831	28.45230343	3.614308205	41.14133608	116.4974198	3111.36	23.2667	26.7	4.49	21.9631	79.4403	3847.22	31.6564126	27.03516409	4.138717305	25.63133233	86.52823679	738000	217000	1160	N	6.1	1886.7	Podzol	4
723	31104	2808.4	23.15690909	26.88492558	4.362619985	12.10746192	150.2326419	11176.74545	2.460090248	24.71654019	5.157597948	2.436807243	257.9893846	13985.14545	6.61628199	25.15198032	4.845491615	4.378801103	236.3504223	738000	233000	1192	NW	5.2	2350.4	Luvisol	3.8
724	88219	2514.68	16.68930727	11.90689392	4.72467003	4.000008996	57.14489972	5703.02	6.36674678	7.681191193	5.135151693	1.289584892	59.85263754	8217.7	9.525530431	8.974289035	4.96447169	2.11899571	59.02404875	746000	177000	1570	W	3.3	1224.2	Cambisol	3.71
725	78460	2176.02	29.5628257	18.71432707	7.663538346	0.193077273	244.7515211	8578.53	10.02643459	12.90940581	7.740960507	0.133456245	171.3427454	10754.55	13.97932688	14.08394354	7.724142072	0.145519655	186.1958973	746000	185000	970	SSW	6.9	1145.7	Cambisol	3.87
726	51181	1143.133333	61.20185185	19.42650318	5.471694317	0.541627025	212.7386279	2335.366667	40.9944201	20.41979632	5.658023158	0.348058523	170.2625688	3478.5	47.63515283	20.09337214	5.587589157	0.411670599	184.2214014	746000	209000	1247	SE	6.1	1700.4	Regosol	3.68
727	24904	2982.64	20.66449447	28.89141063	5.033537832	2.235132976	153.1988085	4246.96	12.52	32.05	6.26	0.1485	205.8637	7229.6	15.88008839	30.74689402	5.382809359	1.009360211	184.1362999	746000	241000	1275	S	5.5	2170.2	Cambisol	2.36
728	12258	3334.871429	17.49328639	51.71546279	6.827026005	0.249882855	374.1082955	12649.42857	2.782021861	45.5790143	7.486448217	0.214744717	314.1681246	15984.3	5.85129457	46.85928724	7.244966449	0.222075734	326.6736934	746000	257000	685	W	8.7	1330.8	Gleysol	4.36
729	118233	1800.1	29.15974501	4.083764791	3.34172312	30.61277335	51.54157986	7399.55	12.82519538	2.315149908	4.096348519	7.982287499	13.32804953	9199.65	16.02138467	2.661215644	3.813851673	12.4104057	20.80530963	754000	153000	1780	N	1.9	1226	Podzol	2.67
730	108489	1102.2	24.37186037	10.79799946	3.360342497	62.99043693	98.52786438	NA	NA	NA	NA	NA	NA	1102.2	24.37186037	10.79799946	3.360342497	62.99043693	98.52786438	754000	161000	1977	SW	1.3	1239.8	Podzol	2.7
731	51197	2824.066667	11.31849012	22.71227308	4.768477712	4.034410298	75.34616496	3536.633333	4.026389787	20.75547272	5.34	0.8978	82.4132	6360.7	7.263985882	21.6242662	4.995338055	2.290413484	79.27552992	754000	209000	650	NE	8.4	1265	Cambisol	5.36
732	68760	2299.481818	21.88104865	27.9118416	6.617599657	0.012070898	162.372071	6116.018182	16.06741675	25.23268868	6.954817801	0	165.8386488	8415.5	17.65595467	25.96475016	6.834003294	0.003298296	164.8914285	762000	193000	1065	NW	5.9	1063.3	Phaeozem	3.69
733	51213	1040.166667	71.98159607	19.87627303	6.933508189	0.109515276	261.0613003	4877.533333	22.981069	19.83123983	7.361425858	0.089690114	215.8203161	5917.7	31.59399546	19.83915542	7.249135396	0.093174825	223.7724197	762000	209000	1275	W	5.4	1562.7	Regosol	3.27
734	12290	2719.266667	45.10585244	17.53988882	4.38491905	24.69742227	143.6753673	12179.38889	7.646055859	13.34500978	3.950708944	73.83144848	133.9249054	14898.65556	14.48312755	14.11064898	4.003942408	64.86362456	135.7045361	762000	257000	790	E	8.3	1487.1	Cambisol	5.18
735	135661	1683.397727	60.12636506	7.536949757	4.09966356	14.02746305	83.39016703	3792.102273	11.0429716	4.442766755	4.324617196	9.716298976	19.32578988	5475.5	26.13325979	5.394048032	4.242321077	11.04173114	39.02185908	770000	137000	1270	W	5.7	1192.1	Cambisol	2.25
736	98263	1896.55	28.69021397	33.43678917	7.506650312	0.13713485	226.5799512	1239.35	28.95618413	34.84477549	7.685262226	0.144416097	225.3811457	3135.9	28.79532896	33.99324436	7.568762786	0.140012497	226.1061671	770000	169000	1770	W	1.8	1014.7	Calcisol	3.65
737	51229	2388.55	32.17375397	36.06110297	6.655494404	0.531717004	176.4395552	415.35	13.9152	26.85	7.3	0.547	165.1669	2803.9	29.46906037	34.69663504	6.708329331	0.533980919	174.7697035	770000	209000	1537	S	4.6	1616.9	Phaeozem	2
738	88283	722.1	35.87531298	3.405054702	5.085780386	0.696377898	112.6495094	2753.666667	4.0899207	1.663505629	7.65706842	0	81.57695807	3475.766667	10.69342259	2.025317196	5.763811871	0.144674407	88.03236532	778000	177000	1405	NW	4.5	1023.1	Regosol	4.7
739	127597	720.75	55.34581478	10.908342	4.767983596	6.546818078	116.3538822	2472.616667	36.20622687	12.50020794	5.137159223	1.58759425	106.6457636	3193.366667	40.52607468	12.14092024	5.022417478	2.706902162	108.8369077	786000	145000	2045	E	0.6	1090.6	Cambisol	2.42
740	118297	1805.45	48.82454059	5.174607439	3.181128808	68.11436055	107.5372284	5795.85	9.126388882	3.212699604	4.666271525	5.625572477	10.14172145	7601.3	18.5554376	3.678689172	3.762049962	20.46782083	33.27496418	786000	153000	1860	N	1.3	905.3	Podzol	3.05
741	68808	2022.033333	76.12453824	32.33131007	5.787163121	0.854568162	284.5899534	5381.226667	30.66678739	27.23094313	7.208434658	0.713493035	254.0175433	7403.26	43.08254578	28.62399321	6.309056331	0.752024521	262.3677069	786000	193000	1260	E	5.3	1388.6	Phaeozem	4.69
742	98311	1499.2	34.21053562	8.265301494	3.815349671	52.30359711	102.8970978	2711.7	7.131546631	9.240682966	4.406298705	19.55102488	40.0884546	4210.9	16.77243582	8.893419459	4.09835087	31.21187085	62.45011549	794000	169000	1812	SW	2.3	857	Cambisol	3.32
743	142411	1271.3	64.9753301	9.565610006	3.518250365	97.11025294	135.7867724	1768.3	48.72560805	4.852748402	4.184454087	28.46949346	38.13044538	3039.6	55.52198641	6.823883077	3.782879342	57.17820432	78.97479614	802000	129000	1845	N	1.5	1209.8	Podzol	2.99
744	135702	543.0333333	30.18331103	11.66801915	4.49288896	6.137560236	76.39962441	2563.066667	3.757426553	5.055011575	5.292205752	0.412184111	32.77455902	3106.1	8.377411786	6.211150639	5.007430361	1.413140321	40.40144311	802000	137000	1200	ESE	5.2	1046.9	Cambisol	3.77
745	88331	1609.3	26.92270615	6.72749332	3.863084494	29.1450982	49.20375229	4421.3	16.68407708	2.816031484	4.72080338	5.256860573	14.28463074	6030.6	19.41631363	3.85982738	4.296540067	11.63157301	23.60299745	802000	177000	1580	NE	3.1	834.5	Podzol	3.46
746	98343	1333	36.17130945	4.711046512	5.186358499	3.17020886	134.9469961	2911.5	2.775	3.45	7.53	0.0417	111.9151	4244.5	13.26322724	3.846036047	5.685076418	1.024219098	119.1483472	810000	169000	1710	WSW	2.3	874.7	Phaeozem	3.95
747	78604	1610.188889	15.93267532	4.070982355	7.165240289	0.097999807	137.2398103	4117.777778	1.1987363	0.89846708	7.094168883	0	98.99412484	5727.966667	5.340594359	1.790292949	7.113001131	0.027548729	109.7453707	818000	185000	1375	E	4.7	746.1	Regosol	4.14
748	78620	1665	133.1725779	17.52237838	7.20313137	0.261072492	448.3099432	NA	NA	NA	NA	NA	NA	3963.2	61.77868438	22.61556823	7.337562413	0.126400752	291.8990222	826000	185000	1790	N	1.9	849.2	Phaeozem	2.91
749	379199	2807.28	48.1749829	16.21776096	4.054563997	12.82745808	120.6760627	11127.28	12.72219193	15.80233858	5.758951482	0.149448725	111.7089638	13934.56	19.8645711	15.88603027	4.717635257	2.703581909	113.5154907	664450	236025	750	ENE	8.4	1252.8	Gleysol	4.46
750	379200	2646.044444	23.28602932	20.81940087	5.255335919	0.279283124	121.8360775	8085.938889	7.576646195	21.35294881	6.993646755	0	128.1812845	10731.98333	11.44990286	21.22139889	5.839827163	0.068859179	126.61683	658875	233475	510	ENE	9.4	1133.4	Stagnosol	5.25
751	379201	3239.051852	24.0680103	16.58569437	3.73996304	52.04758182	85.34392406	10073.64815	4.856559505	23.45108966	3.893924038	51.25461161	118.4591837	13312.7	9.530809302	21.78070189	3.851143247	51.44754554	110.4020621	664450	234300	857		7.8	1421.5	Luvisol	4.95
752	379202	3259.58	34.384062	19.80193553	3.303662514	91.2428797	118.6428686	12161.72	0.865206747	20.4417325	4.261692984	18.4286978	104.7865279	15421.3	7.950043317	20.30649945	3.829106183	33.81933614	107.7153245	666350	219900	500		9.6	1199.5	Planosol	4.21
753	379203	3180.4	21.84308012	27.15657779	5.237780505	1.159049138	108.7410779	12443.40588	1.00479886	19.95529035	7.07125158	0	154.8193101	15623.80588	5.2466635	21.42119275	5.904842241	0.235937383	145.4395719	659475	219675	570		9.4	1149.9	Gleysol	4.86
754	379204	2165.785714	28.50494753	19.80802249	3.912023251	41.48934248	64.83765849	7902.614286	1.722510092	18.31371906	4.207732023	15.99848677	72.56119051	10068.4	7.483606233	18.63515454	4.124993973	21.48175434	70.89980287	664580	208170	548	ESE	9.2	1321.4	Cambisol	5.78
755	379205	4008.7	17.89381321	35	5.071229425	1.07659213	222.4158212	13346.53333	3.463699649	45	6.485629313	0.173561488	235.5260934	17355.23333	6.796757471	42.6902068	5.65526148	0.382142892	232.4978917	663200	213550	457	W	9.7	1206.5	Stagnosol	5.82
756	379206	2215.733333	33.65998127	20	7.243250598	0	235.9014273	3657.5	19.60520464	16.3524812	7.423162609	0	209.2048897	5873.233333	24.90750327	17.72854248	7.346292808	0	219.2764134	655560	222630	557	NNW	9.4	1154.8	Regosol	6.84
757	379207	2495.186957	30.38559794	15	7.590701729	0	254.5550593	8289.213043	17.68877284	15	7.629611389	0	200.1545136	10784.4	20.62643765	15	7.620293929	0	212.7411696	661620	234050	529	N	9.3	1160	Gleysol	3.11
758	379208	2801.4	15.04167345	35	4.083567244	14.77009156	80.34373911	9930.466667	5.177489745	41.90135408	4.700048426	3.006605899	106.0330174	12731.86667	7.347911801	40.38284514	4.472211131	5.594932465	100.3805906	659175	233450	455	ENE	9.4	1118.1	Luvisol	6.1
759	379209	2642.7	30.05302922	23.5	6.135392184	0	174.2379799	8149.3	1.872983319	16.54524315	7.16882061	0	137.7737737	10792	8.773595559	18.24829503	6.637365757	0	146.7029766	658500	233330	584	NE	9.3	1187.6	Stagnosol	3.77
760	379210	2611.733333	78.1953215	20.26820375	5.415814293	0.510478881	282.5955677	8683.333333	3.975228407	10.35065259	7.111318987	0	176.7570583	11295.06667	21.1369767	12.64386605	6.023598652	0.118036905	201.2298632	656550	225390	750		8.5	1287.3	Gleysol	3.87
761	379211	2142.921429	14.35134966	9.442474892	3.768330997	28.45400816	37.86186418	3937.278571	6.147493972	8.804344825	3.842928214	21.61037974	35.05754026	6080.2	9.038882109	9.029249038	3.815151492	24.02236586	36.04590344	641425	231350	580	SW	9.1	1153.6	Cambisol	3.95
762	379212	2525.5	10.95068382	15	3.581137882	49.27206994	64.58181378	11699.9	1.677173395	15	4.065833726	22.20269971	48.48709202	14225.4	3.323541904	15	3.930879348	27.0084482	51.34446122	640500	234370	505	NW	9.2	1152.9	Cambisol	5.35
763	379213	2354.3	16.13144693	15	4.940433418	1.098909582	108.3783081	1940.2	2.946717864	9.716730234	7.205570045	0	139.9757628	4294.5	10.1747555	12.61308651	5.199544845	0.602436333	122.6536327	644250	226500	577	SSE	9.6	1131.8	Cambisol	4.19
764	379214	2899.414286	21.27207608	12.29092107	3.486453087	53.29926323	73.94573154	11804.48571	2.673663765	17.17416351	3.671453399	58.75709848	79.19556655	14703.9	6.341024286	16.2112528	3.628199756	57.68088567	78.16036864	645100	215230	633	WSW	9.1	1222.7	Luvisol	4.34
765	379215	2888.875	26.14334802	17.66407338	3.754848458	56.19635293	67.70800038	10328.525	7.191490508	20	4.192433053	30.58531236	34.29241398	13217.4	11.33372327	19.48944573	4.052530011	36.18301651	41.59592694	671140	212370	599	NNW	9.5	1536.8	Luvisol	5.47
766	379216	2799.878947	66.87891106	17.62754865	3.400117518	152.6940036	186.2086163	12295.50677	6.48659412	16.07092859	3.838130507	111.1605889	121.6533582	15095.38571	17.68810828	16.35964912	3.716557249	118.8641703	133.6270111	671020	212425	620	NW	9.2	1547.6	Podzol	4.45
767	379217	2568.552632	56.35927793	10.48849034	3.457466634	60.90612099	72.14706106	5297.547368	7.42724673	12.71118611	4.023901003	39.10894302	42.58689099	7866.1	23.40524059	11.98539937	3.750497738	46.22647252	52.23930484	670830	212550	610	NNW	9.2	1513.1	Podzol	5.73
768	379218	3078.54	15.18698675	17.39926296	4.027549708	22.3877362	88.87442271	8883.16	2.120919335	15.97985041	4.832542144	2.551285606	103.9337089	11961.7	5.483686433	16.34515955	4.455002614	7.656522038	100.0579542	668200	212750	590	SE	9.6	1410.1	Cambisol	5.84
769	379219	3040.136364	18.40090606	17.40000299	7.51709925	0	190.6587928	10375.96364	5.580710418	13.44246212	7.651424024	0	167.8377715	13416.1	8.485812718	14.33925507	7.617142397	0	173.0090968	668720	217130	420		9.7	1227	Phaeozem	5.33
770	379220	2105.22	24.48726197	23.5	5.551124938	0.342384796	204.8921579	3919.63	9.35405582	13.27626715	7.605593575	0	174.250636	6024.85	14.6419432	16.84867258	6.000698778	0.119637057	184.9574826	655140	229500	725	S	8.5	1302.3	Cambisol	4.43
771	379221	2841.409677	33.26885533	13.91701938	3.396199198	61.62348868	78.155108	8123.630323	4.47076468	13.46156953	3.853208762	61.65373411	67.3071744	10965.04	11.93331598	13.57959187	3.68204202	61.6458965	70.11823788	638500	214425	720	NW	8.7	1348.9	Podzol	4.41
772	379222	3047.65	22.96359031	17.2385707	3.724570509	40.45476987	53.60484263	11404.15	2.304737574	19.62304512	3.897269009	37.84818914	61.38306296	14451.8	6.661354226	19.12019818	3.854701239	38.3978747	59.74276257	656580	268875	470		9.4	1107.6	Planosol	5.37
773	379223	3061.885714	30.86775166	56.63259149	6.78899388	0	343.8441487	11628.51429	8.122710939	47.29910319	7.192570055	0	268.4234129	14690.4	12.86340658	49.24446033	7.072177819	0	284.1431805	603750	255710	653	SW	9.3	1168.4	Gleysol	3.8
774	379224	1632.7	58.37751624	32.35425369	7.555304506	0	301.076141	5880.6	22.74428887	25.49595194	7.662707892	0	204.0313396	7513.3	30.48767331	26.9863156	7.637004732	0	225.1199487	654780	264525	680	SW	8.7	1180.1	Kastanozem	3.07
775	114251	2464.464706	34.33717924	24.70748092	3.799842975	59.91581206	212.9416141	9874.260294	10.08140999	39.69445291	6.224724049	0	214.609608	12338.725	14.92611535	36.70104285	4.492897816	11.96723358	214.2764527	562000	156000	1295	NW	5.6	1672.1	Calcisol	4.66
776	113054	1794.6	33.06874174	45	6.729813741	0	488.1766396	1240.6	4.678059004	45	7.168702763	0	300.3345238	3035.2	21.46440562	45	6.860554879	0	411.3985265	562000	157000	1167	NW	5.7	1798.5	Cambisol	4.93
777	113056	2739.366667	29.94849345	43.36957448	6.968476284	0	387.8510877	7757.844444	16.41006428	55	7	0	324.2728801	10497.21111	19.9430714	51.96490814	6.991550342	0	340.8643367	563000	157000	1270	WNW	5.5	1681.4	Gleysol	3.68
778	111855	2591.666667	40.12053569	38.73376206	7	0	345.9189945	7876.333333	21.16370784	49.41817258	6.92252179	0	331.8738556	10468	25.85703788	46.77292702	6.940455396	0	335.3511501	563000	158000	1195	NW	5.7	1748.5	Kastanozem	4.24
779	110634	2799.7	32.66753883	46.58937208	5.791574757	0.254425438	337.6876023	8963.3	13.30761765	45.55016177	6.260462745	0.277723519	345.8415141	11763	17.91545335	45.79750319	6.09533446	0.272178366	343.9008096	563000	159000	1150	W	5.7	1797.6	Cambisol	5.54
780	114255	2004.266667	22.2284874	44.62080894	3.477916064	189.4412452	271.3184996	1575.544444	23.59648551	40.29869745	6.70980395	0	257.3431082	3579.811111	22.83056996	42.71856367	3.729620561	106.0644714	265.1676582	564000	156000	1375	ENE	5	1504.5	Cambisol	4.2
781	109379	2432.432258	19.34631769	23.5	5.108472025	4.507385585	132.3055408	10265.08774	5.540066264	19.09252477	6.013512492	0.080981237	204.3081164	12697.52	8.184895438	19.93685381	5.64283828	0.928936485	190.5147625	564000	160000	1150	NNW	5.8	1804.9	Cambisol	5.2
782	113060	2061.063636	134.9185227	46.87873168	5.132590598	0.758662775	478.7646747	11617.9697	42.1633809	44.65677785	5.530780642	0.405742997	263.7562146	13679.03333	56.13909433	44.99156673	5.442209867	0.458918547	296.1522259	565000	157000	1155	ESE	5.9	1787.2	Gleysol	4.3
783	115457	2982.65	28.47725903	45	5.703138923	0.117006085	321.2765787	9023.992857	8.402376287	45	6.672979702	0	283.4480268	12006.64286	13.38931141	45	6.185969707	0.02906626	292.845269	566000	155000	1375	NNW	5	1614.6	Stagnosol	4.68
784	113062	2717.5	52.76257751	45	5.1	0.639423452	227.6889655	11500.42857	11.18936796	45	5.326249972	0.466820207	145.9359674	14217.92857	19.13533536	45	5.27291565	0.499810197	161.561575	566000	157000	1222	NNW	5.7	1671.3	Gleysol	4.17
785	113064	2241.625	37.01721418	16.96020075	5.0680135	0.263270725	142.609586	8798.055	12.12673775	24.39631634	5.742195601	0	173.268228	11039.68	17.18078952	22.88640096	5.497700259	0.053457549	167.0429409	567000	157000	1237	NE	5.5	1675.3	Gleysol	3.84
786	113066	2604	80.195	35	6	0	353.0019	6366.9	6.825987105	41.63117059	6.622150834	0	271.4854436	8970.9	28.12294834	39.70632824	6.337541828	0	295.1473786	568000	157000	1342	NW	5.2	1692.2	Gleysol	4.61
787	24572	1207.1	106.0580644	35.09411068	7.3	0.328513487	516.7113561	2865.9	29.43312051	24.12903207	7.39071444	0	285.0802156	4073	52.14217274	27.37871201	7.361800033	0.097360331	353.7278831	580000	241000	655	NW	8.5	1234.9	Kastanozem	5.42
788	24574	1772.6	69.87	35	6.6	0	430.3842	1881.328571	17.68488895	45	7.132330656	0.052775142	363.8897293	3653.928571	43.00101816	40.14878311	6.796365527	0.027172776	396.1476392	581000	241000	780	NE	7.9	1328.8	Phaeozem	5.48
789	24576	2408.152941	37.87221032	35	5.357896703	0.12065316	241.0749897	4570.447059	11.88931152	42.37783406	6.248996546	0.100591461	254.0394958	6978.6	20.85540704	39.83191471	5.725202735	0.107514288	249.5657455	582000	241000	842	N	7.5	1384.3	Phaeozem	5.23
790	99183	3139.695455	11.55979555	37.48990063	3.8800158	102.0084432	210.1497633	9118.479545	2.68913667	45.16663742	5.433789579	4.953135125	269.0685998	12258.175	4.96118511	43.20038913	4.437670197	29.81198317	253.9776745	583000	168000	1357	ESE	5.9	1605.1	Gleysol	4.61
791	97889	2501.413953	28.58106913	27.40606968	3.588384295	166.3665155	209.5975219	9408.136047	8.486842207	37.91571685	4.011197897	75.97338998	248.3254902	11909.55	12.70731902	35.7083305	3.882151912	94.9590465	240.1912887	583000	169000	1385	NNE	5.1	1612.4	Cambisol	4.5
792	20720	1915	49.005	42.9	6.3	0	299.0524	3276.2	14.52831979	45	7.2847372	0	254.1988865	5191.2	27.24654344	44.22532362	6.662248622	0	270.7450566	583000	246000	785	SE	8.4	1310.3	Phaeozem	5.46
793	100480	2922.8	30.69726848	45	4.837586928	2.125118455	222.7023596	9747.990909	5.208046141	45	6.459364646	0	277.0050281	12670.79091	11.08770271	45	5.441297311	0.490205881	264.4789087	584000	167000	1285	SW	5.8	1616.2	Gleysol	4.26
794	97891	2026.683333	38.98296397	23.5	4.320591832	13.49184007	220.410475	7865.866667	10.08774928	34.69543831	5.697199307	0.492036629	322.2667157	9892.55	16.00750203	32.40183269	4.943511261	3.155301911	301.3994625	584000	169000	1395	WNW	5.2	1591.1	Gleysol	3.62
795	96619	2481.95	30.88943788	35	3.470204416	84.06106421	163.9615333	7340.45	15.23599434	43.64129583	4.142780732	26.22623469	163.8141745	9822.4	19.19134784	41.45779036	3.855822693	40.84009232	163.8514095	585000	170000	1372	ENE	5.3	1609	Gleysol	4.07
796	95355	2868.475	12.33336557	28.02817699	4.099707622	15.90815612	117.301284	9576.917308	2.171581031	35	4.787243563	3.709959953	116.0918027	12445.39231	4.513718922	33.39310007	4.51032367	6.521459976	116.3705699	585000	171000	1322	NE	5.3	1612.8	Gleysol	5.06
797	24582	659.5846154	115.2663	46.45	7.3	0.1013	527.6367	1400.661538	80.44966034	45.79662165	7.378986419	0.055653637	429.9732192	2060.246154	91.59615361	46.00579972	7.352103007	0.070267249	461.2400313	585000	241000	695	NNW	8.1	1295.6	Kastanozem	4.97
798	19087	2186.1	47.03037395	28.3350382	7.123399044	0	287.6754429	3272.977778	6.778469403	9.946383314	7.549001286	0	168.4029229	5459.077778	22.8974353	17.31016161	7.327190847	0	216.1658724	585000	248000	840	SSE	7.6	1341.6	Kastanozem	4.79
799	96621	3032.225	37.59999434	48.27283018	4.259519875	20.25999333	241.9622121	11086.575	13.79201609	47.1710765	5.379273009	0.131307843	231.8865594	14118.8	18.90513809	47.4076947	4.821191016	4.45424629	234.0504576	586000	170000	1525	NW	4.7	1387.5	Gleysol	4.01
800	24584	1654.2	51.87857791	35	6.876715438	0.091962435	368.7148707	2819.353333	17.81080636	45	7.340258615	0	300.1920137	4473.553333	30.40815426	41.30226829	7.108432258	0.034005241	325.5299278	586000	241000	807	NNW	7.7	1345.5	Kastanozem	4.86
801	15770	3114.2	26.55388254	30.14189198	4.876449372	2.119596237	197.9982925	2598.4	7.57056198	28.99796798	7.3318846	0.081847167	238.0755566	5712.6	17.91923979	29.62157336	5.138668818	1.192717551	216.2276036	586000	252000	742	S	8	1239.3	Calcisol	5.48
802	91604	2049.3	14.84247177	10.87862685	3.683861095	42.01185288	79.32337507	6421.523077	6.049857313	15.83468755	5.127885946	1.79844991	110.540618	8470.823077	8.177006546	14.63569483	4.253794595	11.52705904	102.9884008	588000	174000	1240	NNW	5.8	1551.6	Stagnosol	4.92
803	17431	2800.3	41.56622903	23.5	6.70744833	0.081956458	318.6938479	7194.75	6.645172515	24.22881268	7.257488122	0.020914104	264.6153469	9995.05	16.42895895	24.02462219	7.023477709	0.03801626	279.7664493	588000	250000	780	NW	7.9	1260.1	Cambisol	4.48
804	18268	1060.8	117.7345736	25.16732655	7.02388196	0	422.9999999	1141.369231	22.09301992	35	7.36705318	0	234.6470194	2202.169231	68.16421131	30.26353386	7.168430079	0	325.3779401	590000	249000	695	NNE	8.5	1226.7	Kastanozem	4.25
805	19099	1822.6	57.1818	35	6.9	0.0831	330.4415	4463.618182	10.28467146	29.05726296	7.548799927	0.050401959	200.2385778	6286.218182	23.8818302	30.78027547	7.247425617	0.059882293	237.9890725	591000	248000	842	WSW	8	1365.8	Phaeozem	4.17
806	19101	1847.577778	43.88746525	27.51582252	7.424309052	0	254.1718696	5904.922222	9.006240823	35	7.603562048	0.062203451	161.468279	7752.5	17.31914313	33.21636891	7.553657398	0.047379109	183.5614223	592000	248000	782	SE	8.4	1298	Kastanozem	5.41
807	17439	2019.95	82.08077065	25.37847471	6.744945907	0	285.201202	3062.683333	12.89045343	36.00282432	7.413094599	0	226.312914	5082.633333	40.38820353	31.78047469	7.023299161	0	249.7164117	592000	250000	635	NNW	9.3	1203.6	Kastanozem	5.04
808	18274	1826.85	87.5547	46.3	6.5	0.0852	394.7243	2301.405556	45.95019522	45.34397892	6.803509646	0.022543849	321.3741452	4128.255556	64.36116531	45.76704069	6.642863712	0.050270667	353.8333107	593000	249000	655	N	8.5	1231.2	Phaeozem	5.09
809	17441	1265.35	64.10361225	35	7.2	0.06498858	336.0148256	5656.35	10.92253264	35	7.521709697	0	223.4405402	6921.7	20.64451988	35	7.442296943	0.011880506	244.0201481	593000	250000	597	NNE	9.4	1197.6	Phaeozem	6.07
810	18276	791.5	158.1059309	68.77838913	6.784817108	0.186050208	554.9087017	1188.107692	66.1389003	57.9209305	7.320869625	0.054366452	386.1897466	1979.607692	102.9097741	62.2620323	7.025527799	0.107017133	453.6480888	594000	249000	600	SSE	8.8	1204.7	Cambisol	4.03
811	18278	1660.3	81.0153	12.28	7.4	0.162	345.2184	5528.4	26.9102229	20.5080204	7.6	0.076384339	214.0866666	7188.7	39.40631531	18.60767927	7.544970943	0.096158106	244.3728125	595000	249000	445	SW	9.2	1154.2	Kastanozem	4.55
812	17445	1677.38	37.19218247	30.08041529	7.118217062	0.094271514	248.8724912	3577.6325	5.069202751	38.93141917	7.468986323	0.103926766	225.5649508	5255.0125	15.32273568	36.1062124	7.323895023	0.100844846	233.0046291	595000	250000	452	SSE	9.5	1101.5	Planosol	4.95
813	19109	1443.5	40.60494655	35	7.451106366	0.08606602	346.6929503	5874.754545	9.968065391	35	7.675308432	0.007841662	200.7608417	7318.254545	16.01108257	35	7.620969728	0.023271142	229.5454374	596000	248000	655	NNW	8.6	1224.5	Cambisol	5.11
814	19937	833.4	87.60926969	54.34683225	7.4	0.162742333	412.7856488	959.025	33.74715696	46.25127082	7.478051255	0.018498788	317.082517	1792.425	58.79070676	50.01535629	7.440011003	0.085565789	361.5803286	598000	247000	672	SW	9.2	1223.4	Cambisol	4.23
815	30888	2409.466667	15.05965636	15.60433291	5.215465774	0.171408882	129.3439437	10869.8619	4.847917444	18.61568151	5.695765425	0.123490215	109.2562256	13279.32857	6.70078556	18.06928761	5.560032438	0.132184813	112.9010399	630000	233000	505	NNW	8.9	1169.6	Cambisol	5.09
816	29333	2683.467568	19.05030344	15	3.838497875	38.17288515	58.56497754	9356.182432	3.398701318	17.85726846	3.952103527	56.70333736	76.27497163	12039.65	6.887221888	17.22042377	3.924085443	52.57316186	72.32766462	630000	235000	420	NNW	9	1140.1	Luvisol	4.93
817	30898	2322.9	25.16377373	15	3.626529467	61.49957338	84.09388622	7143.125	1.712626337	4.662236416	3.930857955	38.62972909	67.50267708	9466.025	7.467382983	7.199055306	3.834248529	44.24183779	71.5740502	635000	233000	525	WSW	9	1168.4	Cambisol	4.31
818	28568	2678	34.17457058	23.5	3.617756142	79.80143981	110.9916139	10813.12	3.156362456	23.28065535	3.911281292	81.74836211	146.2331358	13491.12	9.313505921	23.32419547	3.835114547	81.3618962	139.2376606	637000	236000	452	NE	9.1	1151.2	Cambisol	4.86
819	28574	2592.55	18.68363349	10.6376714	3.733509034	43.24773167	58.27531427	9916.95	5.04050812	15.23675828	4.125030808	43.3667591	57.31030057	12509.5	7.867998002	14.28361365	4.009996728	43.34209108	57.51029627	640000	236000	527	NNE	9.1	1168.3	Luvisol	5.28
820	27010	2162.066667	17.98937606	21.71369215	3.698306845	53.84440936	84.93763272	5199.233333	3.275316104	15.59167377	3.896403256	37.13629121	76.37022913	7361.3	7.596941165	17.38975453	3.828309663	42.04358548	78.88653708	641000	238000	602	NW	8.9	1193.9	Cambisol	4.76
821	26232	2454.8	31.58804587	15	3.537612307	59.3636269	80.2466834	10924.175	1.428304655	10.96791062	4.026946077	54.04668171	66.92647703	13378.975	6.962071833	11.70772612	3.88622997	55.02224501	69.37049405	641000	239000	580	NW	8.8	1197.7	Cambisol	5.13
822	26236	2274.233333	27.37704627	8.5	4.837967865	10.29481184	131.4966933	8323.944444	1.480436959	10.24368722	4.033034111	44.66478237	66.78193904	10598.17778	7.037517936	9.869514256	4.119729849	37.2894265	80.66889718	643000	239000	560	NW	9.1	1200.6	Cambisol	4.29
823	28582	2268.14	19.65134516	15	4.981540145	0.351645238	120.4419042	9267.635	3.866073567	11.06719379	5.864579215	0	140.3958713	11535.775	6.969740715	11.84045394	5.501841371	0.069139753	136.4725639	644000	236000	597	SW	9	1202.4	Cambisol	4.48
824	25469	2792.557143	16.42562541	15	3.73395318	42.31136775	52.67927551	5928.792857	3.510571533	11.92623348	3.9	38.0085	45.6214	8721.35	7.645943461	12.91044678	3.839635376	39.38626882	47.88131626	644000	240000	482	NNE	9.3	1151.6	Cambisol	5.41
825	21623	2916.2	23.59123517	20.70308621	5.69021523	0.077496166	136.0532294	11211	2.451506199	19.56928552	6.007370679	0	90.91736331	14127.2	6.815263888	19.80332975	5.920284615	0.015997106	100.2345113	644000	245000	450	NNE	9.4	1112.1	Cambisol	5.16
826	26240	2302.6	13.65014158	15	3.700301193	35.61194678	46.91023438	8924.45	2.222854742	12.20242424	3.989437644	29.27324104	47.91599744	11227.05	4.566522105	12.77619009	3.912428587	30.57327122	47.70972152	645000	239000	517	SE	9.2	1203.7	Cambisol	5.09
827	25475	2866.642857	14.35065183	11.77680487	3.798511752	37.00733855	47.20857401	11470.20714	2.39793232	17.26903847	3.9	53.04719693	85.24727273	14336.85	4.787869999	16.17087031	3.877721768	49.84003877	77.64146225	647000	240000	530	WSW	9.2	1200.9	Luvisol	4.64
828	23934	2686.525	20.60114423	23.5	4.002421825	20.828552	70.34527053	7747.975	2.900282977	23.5	3.9	47.22765494	75.61716903	10434.5	7.457646174	23.5	3.924150499	40.43079356	74.25983642	648000	242000	510	SSE	9.3	1218	Cambisol	5.4
829	24710	2613.8875	14.2281507	21.91345745	3.714475955	48.94795747	67.15837408	10669.0125	2.247142531	15	3.809018043	29.31667901	77.13645218	13282.9	4.604836067	16.36047098	3.788715218	33.17983791	75.17290705	649000	241000	602	WNW	8.9	1226.1	Stagnosol	5.28
830	26250	2404.876923	12.92562082	23.97946529	3.661509443	40.57313388	86.01956365	8497.323077	3.20760979	24.95578318	4.502442653	8.844152204	114.462168	10902.2	5.351270745	24.74042074	4.139059851	15.84313368	108.1881167	650000	239000	592	NNW	8.9	1221.1	Podzol	4.87
831	25481	2718.2375	24.96431566	14.19118202	3.55055552	39.4462086	51.57353644	9856.0625	4.248087205	12.82740921	3.854307313	36.14435298	44.49359781	12574.3	8.726398448	13.12222152	3.768342026	36.85812852	46.0240969	650000	240000	507	NNW	9.3	1221.8	Cambisol	5.2
832	23169	2761.85	12.81655006	15.23770226	3.818125999	29.00793368	47.59596965	8992.55	1.576194906	15.90568471	4.052878153	19.15595505	36.30827867	11754.4	4.217263346	15.7487335	3.985267397	21.47080627	38.96046928	650000	243000	530	SE	9.2	1237.1	Cambisol	6
833	28596	2181.857143	22.5758	26.45	6.8	0	233.702	8720.642857	2.682316087	17.65485081	7.114344565	0	200.569739	10902.5	6.66348921	19.41497546	7.030632259	0	207.2003155	651000	236000	620	NNE	8.8	1206.9	Cambisol	5.75
834	154845	1457.7	74.39832064	14.04575701	3.993138875	36.61201354	48.08408293	4358.18	14.06257135	20.06799857	4.805908252	11.78989818	14.81749914	5815.88	29.18520485	18.55857583	4.429698705	18.01134662	23.15548053	693000	111000	835	NNE	8.4	2117	Cambisol	4.34
835	152926	1507.125	97.09726964	8.5	4.014523107	42.03986359	61.41519691	4251.444231	93.82769389	8.5	4.277788166	32.680939	37.81237023	5758.569231	94.68340286	8.5	4.192096317	35.13034417	43.98967031	693000	114000	932	SE	8.4	2087.1	Umbrisol	5.49
836	154847	1164.031818	120.6836308	8.296397318	3.797144373	60.75257904	79.250991	3624.862299	66.86592805	8.5	4.149500383	32.33482278	38.59114501	4788.894118	79.94734453	8.450510495	4.034204541	39.24229905	48.47429409	694000	111000	997	NE	7.5	2069.3	Cambisol	3.69
837	152928	1342.355556	122.0035493	8.5	3.768157924	55.96125334	80.59256225	1810.844444	112.9	8.5	4.03	46.8099	58.9395	3153.2	116.7754916	8.5	3.898943209	50.70574232	68.15747171	694000	114000	722	S	9.6	2088.1	Umbrisol	3.78
838	152261	1340.266667	56.3772493	8.5	3.953860834	36.33656927	46.21084929	2556.233333	15.11227809	5.883063622	4.624752258	13.27434679	16.74536359	3896.5	29.30605851	6.783202874	4.269072345	21.20698584	26.88051265	694000	115000	1190	S	6.7	1898	Cambisol	3.75
839	154849	962.96	62.60602725	8.5	3.809893055	41.44834426	63.93856182	3162.668571	43.09203611	10.06449707	4.258738974	30.81663639	38.70866057	4125.628571	47.64678276	9.699328933	4.105631241	33.29817568	44.59755369	695000	111000	1197	WNW	6.8	1998.7	Cambisol	5.34
840	152930	1360.492857	90.89170432	7.706060514	4.06484755	40.08770563	59.29934611	6138.740476	10.17335723	4.234424388	4.496955954	12.90664211	16.4625831	7499.233333	24.81708544	4.864240256	4.379933211	17.83776522	24.23392552	695000	114000	620	SSE	9.8	2145	Umbrisol	5.32
841	152263	1623.6	75.83228381	8.5	3.528025568	63.30143651	88.46897591	4699.866667	29.03358875	8.228538398	4.517423041	16.4682269	19.41143162	6323.466667	41.04952326	8.298238308	4.005687077	28.49302329	37.14250143	695000	115000	1070	NNW	7.6	2021.6	Cambisol	5.26
842	151591	1501.7	121.8888972	8.826816275	3.709602269	63.42214831	85.96623085	4591.133333	36.22954245	5.990855562	4.585626225	15.60618277	20.44144416	6092.833333	57.34199475	6.689834505	4.16962574	27.39137884	36.59133154	695000	116000	930	NNW	7.7	2105.3	Cambisol	5.6
843	154235	1414.1	80.65883035	8.5	3.756399287	39.79523332	60.52286931	5796.32	32.25948167	11.09726861	4.513617326	18.25357379	21.64795035	7210.42	41.75151112	10.58789502	4.229136559	22.47830144	29.27205864	696000	112000	960	SSW	7.6	2071.1	Cambisol	5.69
844	153593	830.4	125.3969822	8.5	3.272786106	60.1292261	110.2316501	NA	NA	NA	NA	NA	NA	830.4	125.3969822	8.5	3.272786106	60.1292261	110.2316501	696000	113000	597	NW	9.7	2167.6	Umbrisol	3.6
845	152265	162.9	148.01	12.75	3.62	67.2683	95.808	NA	NA	NA	NA	NA	NA	162.9	148.01	12.75	3.62	67.2683	95.808	696000	115000	675	ENE	9.4	2092	Leptosol	3.11
846	151593	815.9	100.0635605	10.85479838	4.08858606	26.57113291	102.6201827	986.3	55.70198621	7.981962892	4.174498377	29.59196941	41.24268955	1802.2	75.78555543	9.282565753	4.133488618	28.22436287	69.02978123	696000	116000	860	SE	8	2093.7	Cambisol	4.74
847	152934	1441.26	83.69831522	6.977582116	4.039634056	36.52232727	49.95367187	4683.84	55.01218983	7.675376401	4.471375639	17.78885157	22.6219522	6125.1	61.76214739	7.511182675	4.325070944	22.19691171	29.0532128	697000	114000	525	N	9.9	2125.8	Umbrisol	4.74
848	149508	1555.698276	40.16310714	8.5	4.072704594	22.02061501	30.93487834	4468.451724	36.45501435	8.5	4.498347696	17.35256235	20.35023428	6024.15	37.41260564	8.5	4.343045105	18.55805714	23.08365103	697000	119000	1295	W	6.1	1870.2	Umbrisol	5.38
849	152936	1413.45	123.4525604	8.5	3.904181104	45.97891317	60.59950402	4944.735714	18.27014971	4.066309336	4.774771909	8.597617151	10.56621809	6358.185714	41.6526184	5.051936424	4.389540831	16.90762809	21.68881677	698000	114000	690	NW	9.1	2106.1	Cambisol	3.84
850	153599	1339.95	127.4858054	8.5	3.836306249	56.77170074	76.85999481	5655.675	28.35065275	8.5	4.828902045	11.43909745	14.24281641	6995.625	47.33911309	8.5	4.398909019	20.12215604	26.23658226	699000	113000	1005	NW	7.4	2048.3	Umbrisol	4.84
851	153601	1274.009091	73.49598604	9.92600381	4.228145473	26.31235894	57.18797295	4514.263636	21.21875371	5.567754431	4.800256545	8.900026629	23.14336464	5788.272727	32.72506524	6.527012847	4.595692024	12.73251185	30.63664329	7.00E+05	113000	525	ENE	10	2073.7	Umbrisol	5.55
852	153605	1639.7	74.11449899	4.422152223	4.008829758	28.75789196	47.46334472	1696.5	8.144051282	3.5	4.967110041	3.102000684	6.186940855	3336.2	40.56768989	3.953226126	4.270472722	15.71154595	26.47377	702000	113000	277	NE	11.8	1884.1	Umbrisol	4.73
853	99421	1127.466667	24.04333311	6.39807947	4.262710469	9.009424693	50.78997209	1400.133333	8.297107971	3.813213027	4.331672606	10.09761853	17.88436729	2527.6	15.32090286	4.966224086	4.299551978	9.612216458	32.56231181	702000	168000	1590	E	3.5	1374.4	Cambisol	3.26
854	96853	1639.22	45.38978282	15	3.31011516	77.10257581	107.2824939	6517.13	13.4221716	15	4.052085868	19.95962159	23.67835499	8156.35	19.8468527	15	3.771396788	31.44390971	40.48067178	702000	170000	1420	NNW	4.6	1263.7	Podzol	4.02
855	98129	1717.8	25.36618582	8.5	4.096940654	12.9785425	53.10906883	2479.4	6.858198758	7.535048802	5	0.1445	49.3137	4197.2	14.43301534	7.929977128	4.412886579	5.397125133	50.86704141	703000	169000	1680	NW	3.1	1414.6	Cambisol	4.45
856	150227	1423	70.69	15	3.6	40.361	69.4027	4869.55	35.32154367	7.760044563	4.198286387	23.28611737	30.15441638	6292.55	43.31978181	9.397291241	3.97541506	27.14743877	39.03004035	704000	118000	1515	WSW	5.4	1692.2	Podzol	5.5
857	96859	1744.725	27.57046956	4.925642293	3.489403239	33.01310589	51.33789129	5897.275	16.32527829	2.708733059	4.057914584	17.66576596	22.8078188	7642	18.89263845	3.214869798	3.849195868	21.16967693	29.32144491	705000	170000	1437	NNE	4.2	1282.8	Cambisol	3.57
858	95599	1410.15	47.90153459	9.330980747	3.583070175	32.03537939	73.96331892	4729.75	13.51871875	3.645835932	4.124005604	14.32704729	23.16804029	6139.9	21.4154154	4.95154237	3.928549518	18.39411752	34.83418504	707000	171000	1300	NW	4.9	1173.7	Podzol	5.07
859	91844	1095.555556	73.21428665	13.55932049	4.004937917	14.00340454	161.4264332	2172.522222	13.28835025	8.571225713	4	16.3445	59.0041	3268.077778	33.37728234	10.24338143	4.001649087	15.55969611	93.33907112	708000	174000	1340	SE	5.3	1194.4	Cambisol	3.73
860	90610	2292.5	29.64350133	12.07548092	3.694970156	45.87580975	63.20217381	5220.690909	14.17906881	6.003723819	4.144600329	22.06463347	28.61154973	7513.190909	18.89773123	7.856399109	3.953118241	29.33013787	39.16618713	709000	175000	1622	SSE	4	1327.6	Cambisol	3.37
861	90612	1553.356757	24.87287909	14.37776689	3.633917641	25.76197224	44.95031601	2886.043243	19.01376859	14.11532857	3.850096521	18.08352027	36.72745736	4439.4	21.06388547	14.20715637	3.761710828	20.77022911	39.60465541	710000	175000	1300	SW	5.5	1134.5	Cambisol	3.34
862	89382	1493.718367	21.89338792	6.781110555	4.049017347	20.26360945	31.74088856	5263.961633	5.871475902	3.881213815	4.414435317	8.306286006	13.32960265	6757.68	9.412961185	4.522207326	4.303276923	10.94933416	17.39923542	712000	176000	1360	SE	5.2	1174.3	Cambisol	3.69
863	91854	1103.925	34.75393573	15	3.565477271	37.88357136	122.1822172	3033.735	17.49985978	11.33542811	4.192301405	17.52579946	104.4479569	4137.66	22.10323603	12.31313351	3.922083952	22.95723978	109.179446	713000	174000	1470	N	3.8	1263.4	Cambisol	3.89
864	88153	853.0666667	55.79235738	8.5	3.864554153	40.03088712	102.2020205	1073.333333	39.17	8.5	4.05	38.0816	80.7776	1926.4	46.5308695	8.5	3.958024548	38.94480176	90.26496449	713000	177000	1630	SSE	3.8	1326.5	Cambisol	3.23
865	91856	1501.35	22.37133381	14.86189096	3.088093859	77.25513319	126.7188294	3304.35	16.52034954	11.52138847	4.515399574	9.5609851	46.47019194	4805.7	18.34825707	12.56499573	3.559028623	30.7093317	71.54068987	714000	174000	1522	WNW	3.9	1250.6	Podzol	3.97
866	90622	1503.975	18.56133978	15	3.882150801	38.72179154	56.75159582	5235.665	8.998965747	14.4209217	3.997370727	21.93390477	31.27450392	6739.64	11.13284404	14.55014511	3.968880785	25.68018232	36.95980897	715000	175000	1157	NW	5.7	1138.6	Cambisol	4.52
867	93104	1412.346667	38.52603119	8.679077847	3.621653734	58.15846966	73.72012442	3101.139048	19.96570842	4.757972554	4.103062589	29.08432645	34.65279916	4513.485714	25.77355	5.984953283	3.889505549	38.18212178	46.87763161	716000	173000	1195	E	5.1	1146.8	Cambisol	4.32
868	89394	404.2	67.02446314	23.5	4.139395417	36.12959045	167.6060096	4450.8	10.35214681	23.5	4.529087866	64.18821203	114.8129671	4855	15.07036519	23.5	4.479495344	61.85220897	119.2082189	718000	176000	1587	NNW	3.5	1281.2	Umbrisol	3.53
869	89396	1465.6	19.59058679	7.598447052	3.058927208	162.0541197	205.3391345	4186.3	11.0858185	5.567162411	3.599745235	141.5573694	163.2663961	5651.9	13.29119871	6.09389692	3.384501428	146.8724028	174.1763211	719000	176000	1542	N	3.3	1297.2	Podzol	4.07
870	88165	1445.233333	25.00488156	7.735802754	3.6170811	128.0404138	160.375604	2183.586667	11.83964853	6.831109673	4.13	99.6794	110.1854	3628.82	17.08290491	7.191417596	3.851432258	110.9746096	130.1744201	719000	177000	1145	NNW	5.4	1162.2	Cambisol	3.94
871	83286	2056.65	44.69222439	4.741429023	3.596339684	44.73650521	64.96150556	2560.55	23.69382086	3.97189471	4.054082484	24.75232072	33.32084137	4617.2	33.04718797	4.314670146	3.791026885	33.65392192	47.41461509	720000	181000	1860	S	3	1490.8	Podzol	3.3
872	379373	2772.671429	18.28762055	16.42776229	3.790577966	46.93046484	67.59580512	12221.0119	2.723142753	24.30593133	3.838404669	58.74988484	95.95493157	14993.68333	5.601366998	22.84907956	3.829154282	56.56420655	90.71068718	659433.1	250099	465	SE	9.4	1112.7	Cambisol	6.31
873	379374	2615	18.00454187	12.46826577	3.94167123	29.00007198	44.71829532	7853.914286	1.304062869	21.42651017	4.096554776	31.57714393	68.74093427	10468.91429	5.475627504	19.18885606	4.052392837	30.93342453	62.74038836	659552.5	250078.5	480	S	9.4	1112.7	Luvisol	6.31
874	379375	2892.5	15.72871979	16.13597753	3.985095297	45.32735189	62.43070493	10210.34286	1.728225217	16.15361062	4.006060577	44.60526087	58.99310416	13102.84286	4.818885084	16.14971805	4.001344584	44.76466507	59.75196698	540127.5	159379.6	808	NE	7.6	1263	Cambisol	5.74
875	379376	2756.966667	17.07008439	16.48195904	4.02422754	38.7605915	51.82545882	9861.333333	7.007955969	16.28761831	4.132390723	32.8754198	43.93991484	12618.3	9.206425862	16.33007973	4.106351448	34.16126831	45.66282378	540231.3	159411.8	792	NE	7.6	1264.3	Cambisol	5.74
876	379377	2991.35	22.62694904	43.6142093	4.639751902	11.46037194	177.2946574	10858.25	5.53939715	31.52612438	5.604588846	1.397100808	196.5791276	13849.6	9.230106508	34.13700793	5.161183603	3.570648498	192.4139098	511101.5	120387.6	500	NW	10.2	1001.7	Gleysol	5.78
877	379378	3297.516667	18.51103896	28.1348305	4.547621958	11.88091902	117.2207693	11384.01667	5.996402922	31.09560751	5.657833625	0.583815446	197.0934593	14681.53333	8.807227921	30.43060807	5.093137399	3.121178981	179.1538122	511187	120376.3	502		10.2	1006.8	Stagnosol	5.78
878	379379	3233.05	20.29943242	29.61945454	4.356423032	17.58223553	104.1106978	11187.21667	7.189372709	30.73294378	5.599823997	1.546392025	205.078889	14420.26667	10.12867193	30.48329747	4.92748503	5.141657289	182.441637	511689	120520.6	510		10.2	1018.4	Stagnosol	5.69
879	379380	1678.8875	70.97691805	8.65963994	4.077262935	39.18107736	50.61377098	5511.4125	24.40893437	3.865291112	4.656812596	13.19047189	15.66567076	7190.3	35.2822506	4.984739858	4.438459964	19.25910639	23.82582105	708003.4	97704.5	937	S	8.5	2097.5	Umbrisol	4.39
880	379381	1718.15	75.41992637	10.06393068	4.121864644	47.88726378	58.25005534	5461.7	11.89073008	3.035327828	4.895005304	6.42361706	8.621562417	7179.85	27.09337201	4.717284135	4.556541222	16.34593641	20.49774299	708043.3	97649.1	914	S	8.5	2095.3	Umbrisol	4.39
881	379382	859.4	72.34724274	47.0115441	6.982612328	0	399.3279442	6502.26	15.02582505	35.2997695	7.679928883	0	245.2682229	7361.66	21.71752588	36.66700176	7.514167791	0	263.2531508	598381.2	230390.7	1073	S	7.1	1684.9	Cambisol	4.3
882	379383	3199.502703	20.55893379	19.09375786	3.720732761	54.77354351	69.02024689	11197.11109	3.034660458	20.23774453	4.038239384	39.70601129	79.19903276	14396.61379	6.929254055	19.98350499	3.945018443	43.05461887	76.93689991	634055	236030	470	NW	9.1	1153.1	Stagnosol	5.33
883	379384	3182.458065	24.84881314	18.81507163	3.734674961	67.63975811	80.55824517	12120.5202	2.561015099	17.14308777	4.045157491	37.38787423	63.36866081	15302.97826	7.196059429	17.49079908	3.959825768	43.67915624	66.94346373	633773.7	235901.9	479	NW	9.1	1148.5	Stagnosol	5.33
884	379385	648.6971429	55.17554844	6.674984144	4.065854182	28.08037047	61.73710754	2045.124596	25.37731186	3.519292706	4.562358848	14.1355475	23.84549781	2693.821739	32.55300231	4.279212336	4.382063135	17.4935896	32.97014723	705586.5	144788.4	1381	N	4.9	1698.9	Podzol	4.55
885	379386	595.1571429	37.28767036	10.10710377	4.19440105	27.6305338	56.7714814	1742.242857	16.87703814	5.642769583	4.565174058	13.84118569	24.14962519	2337.4	22.07406627	6.77949431	4.436989496	17.3522788	32.45591882	705453.1	144875.8	1319	N	5.1	1668.9	Podzol	4.55
886	379387	1398.6	89.69721436	9.742406692	3.903648588	61.10615703	74.2008394	2404	18.55251872	3.776166805	4.671498953	12.30504357	15.06999185	3802.6	44.71960737	5.970555672	4.226318624	30.25414084	36.81837542	721220.3	109336.7	1213	NE	6.1	1845.6	Cambisol	5.41
887	379388	2025.7	11.86652565	6.269721578	3.474741619	13.06537833	20.4461695	2209.2	7.294898606	7.854230038	3.839600956	37.89454911	45.84176771	4234.9	9.481666863	7.096304517	3.627467516	26.01789293	33.69416959	624659.8	172233.9	1504	SW	4.9	1447.6	Podzol	2.98
888	379389	2123.36	26.14551645	13.77791943	3.415615959	80.31456371	104.638141	9179.24	5.965194101	30.33821885	4.306118152	42.90331404	183.740273	11302.6	9.756365093	27.22712252	3.949687433	49.9315687	168.8797716	624884.7	172159.2	1508	SW	4.7	1465.5	Podzol	2.98
889	379390	1911.25	28.54146842	14.58689601	7.253195835	0	203.9907042	3841.35	10.68128108	10.29102789	7.626370348	0	158.0379003	5752.6	16.6151689	11.71829173	7.464307447	0	173.3053092	599714.2	124008.8	1027	SE	8	796.2	Calcisol	3.77
890	379391	2957.3	14.37246745	15.194965	6.208317946	0.014650103	105.5553064	7763.25	6.147422872	17.93600489	7.427196244	0	144.1240586	10720.55	8.416329256	17.17987976	6.703710663	0.004041281	133.4847378	599796.2	124066.9	1031	SE	8	796.6	Calcisol	3.77
891	379392	1218.2	38.27312285	11.67232392	6.715475157	0.153080726	178.9878801	4169	15.16753427	9.551888942	7.593553413	0	156.2979926	5387.2	20.39236869	10.03137994	7.198811379	0.03461593	161.4288251	632204.1	127342.2	732	N	8.4	655.6	Regosol	2.68
892	379393	2512.175	13.57444943	9.586026053	4.120031074	39.21974754	70.9125588	5123.425	4.829712058	5.183080654	4.392418361	15.41779436	28.60208951	7635.6	7.706802347	6.631685788	4.282836217	23.2488321	42.52258078	788193.6	151920.5	1797	NE	1.4	828.9	Cambisol	2.86
893	379394	1220.275	33.94019832	10.32765155	4.307124479	21.42587485	81.54282946	4014.125	6.357872139	3.931996388	4.492858153	8.756208457	17.70972371	5234.4	12.78803091	5.422990219	4.441931977	11.70983775	32.59088356	788162.4	151863.2	1814	NE	1.3	864.4	Cambisol	2.86
894	379395	1646.982143	27.65079466	7.050825753	3.607686728	53.30062563	90.924127	5192.617857	7.176304128	5.377061563	4.503759495	10.70013915	20.29781194	6839.6	12.10658079	5.780105562	4.079739084	20.95837655	37.30469534	788140	151814.2	1829	NE	1.3	864.6	Podzol	2.86
895	379396	2084.15	17.72938066	9.785783173	7.517205839	0	119.1351633	5741.45	5.614703428	7.764355694	7.806159723	0	109.1680392	7825.6	8.84114032	8.302711613	7.708653344	0	111.8225298	813527.6	171700	1885	S	1.1	866.6	Calcisol	2.5
896	379397	2848.577778	34.74974036	36.78289946	3.550415739	159.8997946	225.0077083	6433.082222	10.73695585	45	4.383132635	25.57325063	205.5079906	9281.66	18.10657339	42.47813969	3.938925029	66.79859267	211.4925303	696844.1	211620.8	1158	NW	6	2216.4	Gleysol	2.8
897	379398	2095.85	99.24125868	37.55841544	5.187265595	0.202560264	314.3809574	6992.95	16.32435843	43.78898248	6.016034512	0.029827931	229.5306011	9088.8	35.44474675	42.35223242	5.649795216	0.069659489	249.0968385	696796.8	211550.8	1154	NW	6	2216.5	Gleysol	2.8
898	379399	1086.35	76.10559405	54.58861785	7.46424263	0	462.7042205	3584.875	19.72693632	37.18499181	7.819422532	0	243.1058113	4671.225	32.83847662	41.23241602	7.707378663	0	294.1760834	682234.3	282007.6	560	N	8.8	952.5	Cambisol	4.29
899	379400	922.1	60.2405058	48.90311246	7.251959359	0.090506604	452.0931113	1527.706667	13.77708645	27.51438016	7.677707775	0.017923074	251.328368	2449.806667	31.26578038	35.56503588	7.466368444	0.045243301	326.8956249	682307.2	282081.2	521	N	8.8	951	Calcisol	4.29
900	379401	2433.5	16.8767894	22.37583933	4.631752597	10.29540386	92.54499859	9502.233333	4.707308946	22.90962055	5.310895422	1.015439914	130.7562703	11935.73333	7.188466144	22.80079132	5.062912237	2.907472153	122.9656196	723391.6	224995.7	719	W	8.1	1833.9	Cambisol	4.78
901	379228	2473.971429	21.71716686	12.63318378	7.678436895	0.116411757	197.0278989	10287.95714	0.387474696	10.52556456	7.824163062	0	144.0939035	12761.92857	4.52235515	10.93413837	7.79182994	0.022567072	154.3554554	701125	272775	500	S	9	1058.4	Cambisol	4.74
902	379229	2010.025	18.70056875	14.32216639	4.10761998	15.76910337	45.26747864	3876.75	6.780318254	17.58444831	4.435011736	8.342192449	94.89284225	5886.775	10.85045878	16.47055009	4.293818115	10.87809311	77.94838259	694550	283100	397		9.5	869.6	Luvisol	3.85
903	379230	3187.1	50.18858933	15	7.640686009	0	284.1178704	13031.02632	14.51805945	8.359885819	7.757842054	0.071448659	175.5707634	16218.12632	21.52784243	9.664765772	7.732187563	0.057407948	196.901864	695150	281900	410		9.5	871.9	Phaeozem	3.47
904	379231	2070.466667	21.73691938	12.23168609	3.808077357	29.1982382	45.52689045	6716.461905	5.69117849	13.53976279	3.974702154	18.85836039	50.74439712	8786.928571	9.472041323	13.23154027	3.929303145	21.29474896	49.51499443	695800	282640	400		9.5	865.2	Luvisol	3.68
905	379232	3279.95	13.64875822	18.67420616	4.058095617	24.01777275	82.19900367	8493.03	4.721526462	32.45849838	4.747642826	3.048089783	177.3493667	11772.98	7.20865154	28.61819718	4.428640686	8.89023949	150.8404936	717950	256600	690		8.3	1384.7	Gleysol	5.42
906	379233	2358.4	7.486476857	13.51258904	3.739915304	42.82316891	58.36481419	8185.566667	2.696387059	26.14435307	4.599704016	6.129316022	132.6885343	10543.96667	3.767800517	23.3189693	4.220234218	14.3367379	116.0643295	718050	256900	657	NW	8.6	1331.8	Cambisol	4.76
907	379234	2029.2	13.55145798	16.46058052	3.773274958	39.46273024	57.21728425	10620.2	1.764894487	21.32968353	4.221741516	20.35639089	119.7000888	12649.4	3.655679397	20.54858847	4.111115107	23.42140455	109.67668	716350	261200	497	W	8.9	1114.6	Luvisol	4.93
908	379235	2796.9	30.77730611	42.5053166	7.16983541	0	369.2723739	10997	5.258589603	52.61429299	7.364705589	0	417.8297218	13793.9	10.43285491	50.56456115	7.317500251	0	407.984062	713950	258650	597	S	8.6	1326.9	Kastanozem	5.11
909	379236	2496	61.791923	17.9609375	7.509226559	0.039892628	274.4382091	9954.08	26.1503438	14.345405	6.769223615	0.030260343	154.2338619	12450.08	33.29579039	15.07024927	6.84701703	0.03219143	178.3325063	715875	259325	550	NE	8.7	1263.2	Gleysol	3.76
910	379237	1997	28.22855188	43.9680671	7.278227232	0	377.7004479	7134.36	3.049008001	58.8037639	7.414341301	0	430.2044261	9131.36	8.555695846	55.5592432	7.380716641	0	418.7219695	724360	271780	557	SW	8.9	1035.4	Phaeozem	5.82
911	379238	1498.9	30.32497403	29.25046367	7.132525366	0	274.4477177	10182.26667	1.380836696	48.08514476	7.769514799	0	283.8065023	11681.16667	5.094880737	45.66832251	7.614804892	0	282.605605	724550	271600	555	SW	9.5	1034.4	Kastanozem	4.68
912	379239	2998	10.08953116	27.40940627	4.75274221	22.74665199	113.9225215	12134.12727	1.877337797	51.50421377	5.122389825	7.765747464	267.7216431	15132.12727	3.504349998	46.73051398	5.019975345	10.73378698	237.2507279	711640	277975	473	NW	9.1	1004.3	Cambisol	4.72
913	379240	3457.13913	7.796788957	23.91501757	4.872642961	2.061726825	111.1790116	10794.66087	3.178955373	31.34918976	4.974249145	1.68517338	181.2641881	14251.8	4.299129188	29.54584088	4.9473318	1.776516063	164.2632334	709200	276750	585	SE	8.7	1062.5	Luvisol	5.65
914	379241	2546.425	10.83441911	13.08699697	4.343609649	14.50904402	44.51060464	5068.575	3.261700236	9.54739917	5.663432014	0.502036793	121.3486215	7615	5.793986599	10.73102626	4.779812123	5.185922988	95.65430144	694200	283150	392		9.6	870.9	Luvisol	4.36
915	379242	3493.25	14.57119064	23.644669	4.704495936	3.723219208	130.7254323	10380.05	5.365295701	23.50251203	6.231183622	0	175.5553083	13873.3	7.683308898	23.53830668	5.266671332	0.937493999	164.2672972	725350	279000	512		9	1019.9	Luvisol	6.01
916	379243	2774.4	23.33483362	23.5	5.235179493	0.970191014	119.6929622	NA	NA	NA	NA	NA	NA	8350.5	10.04505609	23.5	5.708310171	0.377296088	134.2460041	800550	164175	2180	NE	0.2	1058.2	Cambisol	NA
917	379244	2180.8	35.94179223	31.80069241	5.836784494	0.298468493	208.8029979	NA	NA	NA	NA	NA	NA	7394.05	18.83189154	25.94820498	6.332712704	0.201685949	203.0349023	800950	164225	2055	N	0.6	910.4	Cambisol	NA
918	379245	2047.166667	27.81546102	22.28440935	6.243407381	0.124422806	187.9664749	4121.633333	11.09483644	15	7.41	0.0978	162.5054	6168.8	16.64371228	17.41739074	6.666621708	0.106634995	170.9548657	801600	164100	2037	N	0.2	1020.9	Phaeozem	2.21
919	379246	1450.44	45.11697011	40.72228151	7.311512984	0.175303556	272.80518	3798.06	19.21348508	27.55877316	7.393725369	0.152712556	204.4913625	5248.5	26.37199719	31.1965514	7.369406679	0.158955652	223.3701076	802400	163950	2175	SW	0.1	1073.4	Kastanozem	NA
920	378723	1764.266667	60.80765634	5.305848511	4.053731769	26.26225394	55.52688187	NA	NA	NA	NA	NA	NA	5890.754545	32.85689007	3.195796417	4.38100052	15.04789367	25.98978551	694750	151925	1065	NE	6.4	1590.2	Umbrisol	4.53
921	378722	2003.369565	54.33100675	4.989612609	4.322434047	26.03403226	40.72126014	6230.530435	21.13840597	1.410359366	5.031629858	3.122237754	6.92486792	8233.9	29.21441445	2.281218499	4.730119322	8.696849031	15.14778338	694125	151650	1320	N	5.2	1656	Umbrisol	4.42
922	379247	1822.118182	63.88987423	5.56389392	4.679758339	12.9352683	81.30899152	5406.167532	17.08367319	2.059591823	5.009088493	5.365618604	15.0524539	7228.285714	28.88265753	2.942962074	4.899837815	7.273788381	31.75451115	694750	151910	1074	NNE	6.4	1590.2	Umbrisol	4.01
923	379248	1587.205263	69.18564537	7.316778747	4.300597965	32.76266092	58.95426887	5256.254737	16.34451448	4.125952289	4.722387285	16.42703818	18.97544484	6843.46	28.59997021	4.866001409	4.582310918	20.21576294	28.24774276	720225	111825	730	NW	9.1	1953.1	Umbrisol	4.21
924	379249	1730.403571	61.88752826	11.23130257	3.912620334	52.00924796	67.49214534	NA	NA	NA	NA	NA	NA	7034.2	40.15014428	7.161485315	4.185751938	40.08537889	47.26865221	720350	111800	755	N	9.1	1952.2	Umbrisol	4.76
925	379250	2779.223529	12.54380453	23.01311337	3.75786391	39.97793924	58.18574384	5803.226471	5.330716043	23.83774389	3.932261402	34.19426306	57.37445302	8582.45	7.66650422	23.57070679	3.867795003	36.06716986	57.63717037	723700	79700	615	S	9.3	1767.7	Cambisol	4.63
926	379251	2565.15	28.91907881	21.51659844	3.7817746	41.8904582	59.88536857	5233.55	12.97006525	22.07251149	4.104232379	31.33696497	35.76004223	7798.7	18.21601805	21.88966046	3.969994171	34.80822212	43.69534951	723970	80280	589	SW	9.7	1711.4	Cambisol	5.26
927	379252	1613.3	96.82615757	11.61403645	3.553755138	42.6682733	73.02696692	6379.2	16.03736427	4.501409268	4.60759934	9.120622647	12.04884099	7992.5	32.34472245	5.937105411	4.118611981	15.89227417	24.35738157	711775	98100	780	NW	8.9	1979.1	Cambisol	5.21
929	379253	3221.7	16.10075054	34.04182419	3.626924766	111.405985	151.7597375	7351.9	6.165373626	35.36253758	4.590472312	16.28965716	174.4883645	10573.6	9.192611633	34.96012569	4.046785293	45.27091931	167.5631151	695825	214715	1348	SE	5.1	2288.1	Gleysol	4.19
930	379254	2021.433333	128.0753637	45	3.424274292	107.8333157	133.6089219	11943.82222	7.572642798	39.58624589	4.00736798	40.64114751	131.1906592	13965.25556	25.01508886	40.36987229	3.858302655	50.36703386	131.5406963	696050	214875	1325	S	5.2	2266.7	Stagnosol	3
931	379255	2280.04	34.23504312	28.76885932	3.259847718	213.3686612	253.8956741	8124.214545	10.64679775	35	3.769148719	143.6574258	155.2531442	10404.25455	15.81604296	33.63447689	3.596296666	158.9342921	176.870158	695975	214000	1430	N	4.7	2340.1	Planosol	3.38
932	379256	2190	109.898411	19.38780822	5.759261044	0.18324411	323.2529912	8716.4	10.18893209	25.15787309	6.301362082	0.126812683	142.0967232	10906.4	30.21054864	23.99924677	6.125611759	0.138144087	178.4728167	696065	214250	1304	NE	5.2	2261.1	Gleysol	4.37
933	379257	2054.725	45.81661439	26.31496672	4.688414569	10.84165012	203.0719463	8059.341667	13.39380036	25.88328079	6.19437204	0.300453232	135.164863	10114.06667	19.98066287	25.97098002	5.330460063	2.441951948	148.9605385	696565	214675	1162	SSE	5.9	2250.9	Cambisol	4.99
934	379258	2711.58	24.01977297	23.5	4.831547392	2.472614331	128.4302141	9812.205714	5.141771881	23.5	4.879113446	2.33071334	92.81767495	12523.78571	9.229131036	23.5	4.868363704	2.361436948	100.5283026	696625	214550	1145	NE	6	2229.9	Gleysol	3.45
935	379259	2766.6	25.05010771	30.74920119	4.113676581	28.27274761	163.3986305	10527.55714	6.709531253	34.57072696	4.922899394	3.501662312	208.6279521	13294.15714	10.52632372	33.77544276	4.593880167	8.656685218	199.215438	742160	235860	1320	SW	5.2	2484.3	Planosol	3.34
936	379260	2483.05	90.95356578	21.2504571	5.779411001	0	334.6714932	10278.3	14.76593366	17.98624092	5.98831408	0	211.4197517	12761.35	29.59020382	18.62137842	5.93902116	0	235.401559	742870	237440	1259	WSW	5.8	2304.5	Gleysol	3.88
937	379261	3407.827273	10.16527473	20.08684566	3.941166701	25.92968435	118.6676551	4062.272727	6.165314142	23.61052199	5.909831491	0.229066096	163.6970777	7470.1	7.990078841	22.0030361	4.27648658	11.95357685	143.1548501	760900	258650	527	NNW	9	1347.9	Luvisol	6.61
938	379262	3110.45	19.57243454	10.43967352	3.809467522	42.89944464	52.10155973	11987.425	1.920900694	6.097079544	4.289882595	12.41509397	40.62612129	15097.875	5.557453085	6.991736668	4.138591376	18.69545121	42.99028032	760940	256340	803	NNW	8.3	1485.8	Planosol	4.67
939	379263	3122.723077	19.28998932	23.5	7.342689029	0	302.4746911	11347.64359	2.698706321	23.5	7.615702195	0	249.4297423	14470.36667	6.279125774	23.5	7.540579821	0	260.876908	751020	254250	819	NW	8	1465.6	Gleysol	5.82
940	379264	3412.35	14.68569314	42.04771052	3.34891454	152.3221167	203.0328967	10674.75	1.122953699	30.83222605	3.786567805	62.97645247	139.8751655	14087.1	4.408286659	33.54897814	3.633871219	84.6188542	155.1740052	754400	246270	1075	NNE	6.5	1801.3	Planosol	5.04
941	379265	2506.5	18.26013175	35	4.10840543	32.25688465	211.5207142	8556	3.182981065	20	7.602059335	0	255.2570376	11062.5	6.599105648	23.39864407	4.752715565	7.308644645	245.3474245	754840	247160	920	WSW	7.8	1581.6	Cambisol	4.42
942	379266	3450.754839	12.73955295	34.67746187	3.675539599	55.7011251	116.4467399	10218.54516	2.275453368	35	4.951022948	3.184745171	169.7396634	13669.3	4.917069418	34.91857666	4.210025929	16.44227497	156.2860985	751080	250710	994	WNW	7.6	1580.9	Stagnosol	5.44
943	379267	2772.46	18.14222322	16.32404002	3.258410496	92.91153244	117.0575574	10287.59	5.520342792	23.40024505	3.779363512	102.1534878	118.6025562	13060.05	8.199785721	21.89806892	3.605535829	100.1915541	118.2745753	737560	240140	1020	ENE	7.1	2007.6	Planosol	5.73
944	379268	3493.338462	9.508034413	21.58205838	3.467027141	63.26023948	104.8764096	8462.411538	1.804439269	18.61281175	4.308854196	22.27546444	132.318343	11955.75	4.055344918	19.48039291	3.871454543	34.25076427	124.3001123	737400	241160	1000	N	7.4	1833	Gleysol	3.72
945	379269	2358.24	24.09166005	18.73809197	5.383001863	0.255226006	138.3717296	9030.62	5.928081337	18.69288964	5.925968078	0.072409573	124.2153427	11388.86	9.689131861	18.70224948	5.745318324	0.110264549	127.146642	743590	245520	1143	NE	6.7	1967.6	Cambisol	4.45
946	379270	470.4	194.1373682	15	6.524703073	0.385644834	605.711033	NA	NA	NA	NA	NA	NA	470.4	194.1373682	15	6.524703073	0.385644834	605.711033	736460	249550	830	W	8	1543.5	Leptosol	3.82
947	379271	1761.5	25.28929767	23.90274482	7.535629898	0	266.2489128	6469.68	8.284510131	23.31010591	7.605808867	0	241.5034517	8231.18	11.92359144	23.43693261	7.589807243	0	246.799063	736520	249520	831	SSW	8	1544.4	Calcisol	5.87
948	379272	3205.36	22.44891856	37.83063494	3.248784579	258.3766013	333.1383893	11769.45429	6.272039192	34.33970281	3.846097776	80.04443998	254.9916402	14974.81429	9.734701303	35.08693707	3.633153354	118.216451	271.718957	739190	251250	798	N	8.3	1503.7	Cambisol	5.88
949	379273	3013.8	18.15268963	12.93822085	3.997321653	33.61053944	82.44295784	10080.52857	1.674174626	15.10488013	4.907269803	2.054493326	139.3140773	13094.32857	5.466881388	14.60620029	4.48559474	9.317455398	126.2245799	752470	252810	839	NW	8	1512.7	Luvisol	5.72
950	379274	2413.28	146.5230339	21.79708281	3.204919945	100.1209894	143.8133986	13578.82	3.74980907	39.90822443	4.634968591	16.39927531	252.2371685	15992.1	25.29493247	37.17517149	3.94378116	29.03325948	235.8755327	743825	238300	1180	NW	5.9	2191.4	Gleysol	3.63
951	379275	2767.7	23.23147812	20.35977526	3.425879843	102.0558426	131.7427756	6641.885714	3.87662542	30.45226409	4.128069413	58.3897864	170.6259108	9409.585714	9.569588687	27.48369755	3.788123726	71.23355522	159.1889723	743925	238325	1170	NW	5.9	2158	Planosol	3.97
952	379276	3209.854545	19.22944217	31.22250796	3.928800568	57.03706618	194.684806	3692.595455	5.402252382	31.63494819	5.37426929	25.72465999	204.3861338	6902.45	11.83232692	31.44315062	4.243765305	40.28590554	199.8747138	744050	238400	1155	NNW	6.3	2056.8	Planosol	3.99
953	379277	3198.36	21.79810103	32.84852299	4.77432701	3.927208886	166.608896	9899.469412	5.585377574	40.96748454	5.259963293	0.890919081	208.9098687	13097.82941	9.544363796	38.98491468	5.083037519	1.632350928	198.5803909	NA	NA	NA	NA	NA	NA	NA	NA
954	379278	2415.4	24.42184276	19.4545893	3.685713072	71.82305402	107.0137035	5621.5	8.90955694	18.9776243	4.120477678	45.07018556	116.1081671	8036.9	13.57160016	19.12097077	3.939407615	53.1104596	113.3749283	745800	239550	1037	S	7.2	1930.5	Cambisol	4.81
955	379279	2063	40.42087966	23.5	5.481731095	0.210795991	205.8961743	419.9	30.73797335	23.5	6.534653451	0	206.9216721	2482.9	38.78333793	23.5	5.554435325	0.175146856	206.0696032	745875	239550	1025	S	7.5	1730.9	Cambisol	5.28
956	379280	2318.4	19.67792443	15	3.612627105	60.0014736	83.74446362	5081.35	2.75018745	17.96592933	4.730746433	5.375297427	44.78707041	7399.75	8.053780871	17.03668029	4.049591376	22.49010899	56.99272876	748425	241050	1015	S	7.9	1809.1	Cambisol	4.2
957	379281	2933.333333	29.27253068	40.51064716	5.269471756	0.575514966	167.3846268	10642.75238	4.467157457	36.03497965	6.377521504	0.039475988	179.4371288	13576.08571	9.82676034	37.00202015	5.826689934	0.155295896	176.8329904	754050	244040	877	NNE	7.7	1656.3	Gleysol	4.81
958	379282	1626.958333	29.67370893	24.11245781	7.355489537	0	229.6756437	1369.496212	5.590155205	14.32545727	7.474066895	0	151.6766525	2996.454545	18.66658865	19.6394181	7.405710239	0	194.0270726	750800	242325	810		8.3	1636.3	Fluvisol	4.59
959	379283	3112.483333	14.87794928	20	3.876528281	15.95977983	65.40083358	12969.51667	1.599292122	30.60509837	3.831198499	32.40989605	104.042038	16082	4.169221179	28.5526054	3.839610163	29.22616812	96.56348406	644600	250825	470		9.3	1103.9	Stagnosol	3.93
960	379284	2886.288889	18.78406231	15	3.643533097	29.72641192	49.90907948	11201.27265	1.669655605	18.94059241	3.751082661	35.51845388	97.60909719	14087.56154	5.176090823	18.13323565	3.726772665	34.33176828	87.83621842	644800	251250	470		9.3	1110.4	Luvisol	4.6
961	379285	3524.085714	22.85877593	45	5.960977695	0.257744698	285.3345512	8750.214286	5.309422173	45	6.861166306	0.07256598	241.4979701	12274.3	10.34803349	45	6.384844464	0.125732814	254.0839318	644760	251300	470		9.3	1095.5	Cambisol	5.54
962	379286	3185.490909	22.17013681	20	3.644328503	43.90936936	65.59220744	12893.90909	0.827981852	32.9369223	3.853946147	33.73697423	96.40068684	16079.4	5.056077466	30.37398784	3.803603484	35.75222805	90.29721712	646620	247170	440	N	9.5	1108.8	Stagnosol	4.79
963	379287	3240.85	15.50389126	20	3.590514435	53.3077134	76.9786424	13276.25	0.260265512	30.3500499	3.834107208	37.44888175	132.7589208	16517.1	3.251244831	28.31924793	3.774317531	40.56057173	121.8141717	646610	247090	447	N	9.4	1122.9	Stagnosol	4.48
964	354136	3295.1	19.20164122	20	3.653610775	38.47575578	54.92789593	13055.6	0.846251417	35.07222954	3.817747054	36.24447315	83.6658983	16350.7	4.545349618	32.03477527	3.779303539	36.69413582	77.87442811	645300	247800	470	NNW	9.4	1117	Stagnosol	4.66
965	379288	2425.6	17.20039949	20	3.945371631	23.00969765	54.33310284	9552.636364	2.595790329	28.62197014	4.02295784	17.18613346	101.441971	11978.23636	5.553232385	26.87601605	4.00608769	18.36540868	91.90239715	645900	253500	610	NNE	9	1150.3	Luvisol	6.39
966	379289	3089.577778	24.40088206	43.90167103	4.97510562	1.50017869	208.888362	7123.372222	5.878985998	32.30216997	6.647029502	0.165978399	269.8376422	10212.95	11.48215046	35.81120122	5.473551047	0.569594942	251.3995277	645270	253640	592	W	9.4	1157	Cambisol	5.92
967	379290	2820.4375	30.26241239	20	3.693006523	29.43858055	41.69595443	8004.3625	4.472136569	23.41632454	3.787565302	32.9075205	52.56725538	10824.8	11.19187837	22.52618986	3.760876885	32.00367671	49.7347019	657650	257700	410		9.5	1091.3	Luvisol	3.73
968	379291	3457.78	13.67513867	13.36720757	3.817786235	19.71459027	30.13358681	12902.22	1.5272674	18.16129255	3.80055236	28.6994741	47.23343969	16360	4.094789792	17.14803515	3.804138277	26.80046728	43.61928754	657450	257480	415	WSW	9.5	1090.5	Luvisol	5.17
969	379292	3377.2	16.9069223	13.92391922	3.596114028	47.56253969	61.26802597	12507.4125	0.829010077	14.71936372	3.69562414	48.11955489	88.39015933	15884.6125	4.247307197	14.55024564	3.672475457	48.00112885	82.62376945	662750	258070	560	W	9.1	1157.9	Stagnosol	5.25
970	379293	3006.4	29.91562433	20	4.841992153	3.526351986	73.73588645	12674.26154	1.366479613	20	4.649203165	3.005590123	84.14134126	15680.66154	6.840110204	20	4.680127517	3.105434027	82.14633874	662850	258350	560		9.1	1155.8	Stagnosol	5.25
971	379294	3242.85625	37.39565601	18.54569419	3.357175697	56.43037575	80.30635153	12659.86193	2.145888741	21.08919848	3.718861974	49.0783724	70.37899018	15902.71818	9.333963559	20.57053125	3.616754629	50.57758089	72.40336145	662975	258260	560	E	9.1	1158.7	Planosol	5.46
972	379295	2407.42	32.69601334	50.79436949	7.269482958	0.178074776	323.3324016	9893.546667	1.33944682	19.27030118	7.2707902	0.13678947	287.1192633	12300.96667	7.476234881	25.43987099	7.27053405	0.14486941	294.2065302	643065	252460	695	S	8.5	1236.8	Gleysol	5.44
973	379296	1686.64	56.22797106	24.13164042	6.350127153	0.236257475	223.9875912	1825.15	6.574302527	15.39509684	7.803634899	0.057884794	157.5016939	3511.79	30.42193108	19.59107777	6.652399849	0.143553498	189.4334933	656205	236230	751	S	8.9	1280.3	Phaeozem	4.1
974	379297	2731.675	12.12124216	23.5	3.882579883	28.47718056	44.37811039	8448.725	1.606779965	23.5	4.212899607	16.6653929	55.32632038	11180.4	4.175748295	23.5	4.10622615	19.55133303	52.6513757	656020	236460	745	W	8.6	1242.1	Luvisol	5.35
975	379298	1889.566667	15.65131454	23.5	6.354078752	0.13747171	146.0081179	3489.686667	4.211478295	28.85601	6.724474851	0.10472374	164.4998171	5379.253333	8.229941807	26.974608	6.556290467	0.116227097	158.0042505	656220	235970	689		9.1	1241	Cambisol	5.22
976	379299	1878	30.64671913	12.1617918	3.680269175	32.4224637	44.5895758	3626.6	3.038323206	14.44779683	4.420273859	8.616509097	68.37373323	5504.6	12.45745766	13.66788232	4.016516055	16.73836768	60.25931117	656060	236350	747	WNW	9	1251.8	Luvisol	4.08
977	379300	2576.42	32.23981871	37.5	7.28865871	0	285.3600489	11334.18	0.689470062	36.72857234	7.29612619	0	218.7997012	13910.6	6.532995809	36.87145055	7.294733395	0	231.127524	655860	236110	674	SW	9.7	1192.3	Gleysol	5.67
978	379301	1971.78	25.28994196	11.00611123	3.909326622	20.58128333	31.06395722	2278.92	3.100376357	6.197319344	4.322621765	11.28803561	19.74423974	4250.7	13.39349082	8.42798245	4.082686096	15.59891147	24.99513784	650350	250650	370		9.7	1061.5	Cambisol	4.13
979	379302	2691.62	22.79882866	15	3.711294214	38.30091109	57.15319403	4998.046667	2.77429619	14.67887121	3.985927598	27.69292939	43.83835686	7689.666667	9.783498854	14.79127617	3.869071559	31.40604947	48.49895967	650800	249200	390		9.6	1060.3	Cambisol	4.61
980	379303	2041.933333	22.28637523	7.661698064	4.017107146	24.16772742	32.28983724	5489.526667	1.082488556	4.510076886	4.182565906	12.59027715	17.08330513	7531.46	6.831297286	5.364546051	4.131133713	15.72916146	21.20610798	650100	249750	390		9.6	1058.6	Cambisol	4.51
981	379304	3584.345455	34.6518526	43.91777375	3.428155874	206.8504984	242.569799	13500.83455	5.655059869	27.0051715	3.803308054	93.86751202	116.0144866	17085.18	11.73837431	30.55331141	3.69343316	117.5705139	142.5648629	674250	228650	395		9.6	1154.5	Planosol	5.21
982	379305	3296.1	25.27185583	35.77531932	3.716416973	106.2772223	148.0308903	6771.2	3.321555854	31.30352375	4.20667482	44.59836397	174.0176205	10067.3	10.50822793	32.76761892	3.980080763	64.79242641	165.5093947	674310	230310	390		9.6	1142.5	Cambisol	4.34
983	379306	3420.495833	24.70663108	25.21158902	3.675028314	72.60192454	102.7440249	6336.76131	2.696930644	22.94444464	3.931169054	62.1912181	112.6230732	9757.257143	10.41263266	23.73921286	3.823379252	65.84078657	109.1598823	674300	230300	390		9.6	1142.5	Cambisol	4.3
984	379307	3363.271429	24.99776064	22.90236759	3.673119722	72.10951128	89.17292854	7214.164935	4.292708701	21.46915574	3.810175491	72.41787898	86.70595651	10577.43636	10.87622357	21.92486923	3.761739906	72.31982835	87.49037121	674170	230380	390		9.6	1140.5	Cambisol	5.16
985	379308	3368	23.75565825	18.8190484	3.710231157	55.21483466	69.0159227	7717.4875	0.05143881	15.27765845	3.876017203	66.34771843	72.57843087	11085.4875	7.253270131	16.35360584	3.818646404	62.96531846	71.49606733	674330	230230	390		9.6	1142.7	Cambisol	6.82
986	379309	2374.408163	30.58329744	16.46196956	3.64415783	43.63592107	57.92463581	6645.291837	5.872657342	19.63775381	4.024185435	40.91406458	46.69610966	9019.7	12.37765702	18.80173842	3.888010905	41.63058489	49.65198448	680460	229050	515		9.5	1333.4	Cambisol	5.3
987	379310	3117.1	23.58410349	18.49215457	3.646913537	53.75213735	73.34488761	7384.7	3.659706691	19.65194524	4.09322607	34.42679644	86.29149384	10501.8	9.573582148	19.30770106	3.907782513	40.16286265	82.44873676	679600	229225	485	W	9.5	1272.3	Cambisol	4.03
988	379311	2922.1	30.40314739	10.00528558	3.492300698	49.95014802	64.92564171	6553.8	5.625871555	8.822567823	4.045445875	30.04697547	33.94983252	9475.9	13.26648382	9.187284585	3.79168998	36.1845519	43.50189745	NA	NA	NA	NA	NA	NA	NA	NA
989	379312	3030.25	27.12040426	19.26522564	3.564910912	63.31277127	82.27096781	6633.95	3.710291455	17.7980336	4.098497213	49.40048847	54.86389976	9664.2	11.05062944	18.25807775	3.853548599	53.76274246	63.45749964	684400	218000	1100	NW	6.3	1949.5	Cambisol	4.69
990	379313	2629.833333	23.44062754	20.58166424	3.833512297	69.18365618	89.34440251	7775.712821	1.596419726	21.69535325	4.057868877	66.06078797	83.16752743	10405.54615	7.117189613	21.41388638	3.989338466	66.85004235	84.72863261	683530	219470	950	W	7.3	1566.9	Cambisol	4.02
991	379314	2557.558824	20.54191368	20.19564129	3.645558022	66.91283108	85.36896595	7750.813904	2.37990431	20.66605316	4.054649189	48.44032243	64.88432038	10308.37273	6.885989659	20.54934162	3.912169028	53.0234442	69.96666338	683600	219460	953	WNW	7.3	1568.5	Cambisol	5.84
992	379315	2118.833333	77.33266137	8.5	3.72937049	73.69013759	86.7404039	6849.666667	21.07616843	11.61009295	4.714488795	18.40982433	20.10607218	8968.5	34.36692301	10.87532475	4.230660335	31.46995372	35.84862034	684630	220920	779	SSE	8	1584	Umbrisol	5.44
993	379316	2756	23.23150399	10.5524873	3.814130741	38.41955164	48.53759935	8292.4	0	9.519183831	4.420482416	11.09968818	44.99597782	11048.4	5.795049509	9.776939195	4.17540113	17.91457031	45.87942781	684420	220850	817	SSE	7.9	1573.9	Cambisol	5.67
994	379317	2514.669231	20.99550735	11.68148036	3.842023214	57.15177325	73.33387078	8936.830769	1.776522584	18.73846222	4.017563606	72.13427474	80.08081012	11451.5	5.99687709	17.18879841	3.972483681	68.8442223	78.59922947	686440	216220	1181	NNW	6.1	2098	Cambisol	4.43
995	379318	3129.869565	16.34812412	15	3.913368985	53.94243978	65.05907964	7934.770435	3.427511368	19.31936756	4.073967201	61.91081845	71.90415165	11064.64	7.082382436	18.09754226	4.022210664	59.65679248	69.96787695	687100	216075	1395	N	4.9	2263.6	Cambisol	4.83
996	379319	2884.65	19.73127086	24.16303624	6.844087251	0.02350567	225.9451709	6999.75	5.776404157	20.53542019	7.346575615	0.012676087	214.6361253	9884.4	9.848973686	21.59409878	7.132702294	0.015836578	217.936542	679425	229175	490	S	9.5	1264.2	Gleysol	5.04
997	379320	2870.6	44.45619104	20.10776144	3.672425897	71.01355131	87.67785361	12547.5	3.84644479	12.35100458	4.062560585	61.039963	64.98578326	15418.1	11.40732049	13.79518683	3.958420177	62.89688328	69.21067849	686730	222500	941	WNW	7.3	1655.7	Umbrisol	5.67
998	379321	2532.8	36.64832359	15	3.733352182	53.11749702	66.56275373	7804.4	4.814694275	15	4.543022597	16.48328234	30.28861325	10337.2	12.61450625	15	4.174596064	25.4593241	39.17643036	686780	222650	945	S	7.4	1607.4	Cambisol	5.2
999	379322	3344.72	28.54465922	24.8223074	3.92191543	85.73089629	100.7229746	12666.68	3.079095738	23.41407906	4.059555948	85.99273107	97.72354401	16011.4	8.3987542	23.70825256	4.026978104	85.93803479	98.35011355	686960	222890	947	NW	7.4	1617.6	Planosol	4.24
1000	379323	2896.82	43.23195559	10.44612955	3.633457023	58.71682553	73.81778371	8309.972308	8.914410251	5.781633809	4.326978773	19.92048877	21.77892506	11206.79231	17.78507984	6.98734943	4.022092248	29.94887166	35.23033938	688320	222550	956	SSW	7.3	1855.3	Cambisol	6.27
1001	379324	3282.833333	13.09097995	20.61595167	3.660726479	64.69616142	76.23885799	12286.91212	0.85012561	30.67413959	3.906428922	109.2576723	121.3178701	15569.74545	3.431072406	28.55340135	3.841819003	99.8620137	111.8130979	692670	223190	1076	W	6.6	2004.8	Cambisol	3.6
1002	379325	2591.2	55.62861068	12.61052794	3.602132627	74.302238	93.38826932	5436.611111	7.550913069	4.79593599	4.509164069	12.06122065	13.66616959	8027.811111	23.06933127	7.318313557	3.992894904	32.15124543	39.3987014	693350	223630	1155	S	6.1	2146.8	Cambisol	4.61
1003	379326	2231.7	25.53923063	10.5688623	4.060624444	41.4744632	76.21649091	7676.2	6.641483937	19.19241747	4.703592911	10.0892429	125.46284	9907.9	10.89809748	17.25000908	4.456915396	17.15859121	114.3703707	693950	223875	1140	E	5.9	2159.4	Cambisol	4.9
1004	379327	2070.2	48.37900106	8.434788909	3.457578746	65.37514253	83.66563521	5582.245455	10.00291849	9.764015621	4.21103678	33.70709427	37.54545425	7652.445455	20.38471953	9.40442271	3.856366854	42.27418487	50.02224996	694620	223640	1033	W	6.9	1958.2	Cambisol	3.5
1005	379328	2478.235	50.17523869	6.075105367	3.724906423	38.89908411	50.13930167	8024.881667	24.91176971	3.25108662	4.623625552	17.51627288	20.00689698	10503.11667	30.87274444	3.917420464	4.203213592	22.56159731	27.11670851	693600	223000	987	S	7.5	1915.2	Podzol	3.69
1006	379329	727.1	63.1676867	15	3.683747394	47.5529708	128.0027472	NA	NA	NA	NA	NA	NA	727.1	63.1676867	15	3.683747394	47.5529708	128.0027472	691060	223780	955	NW	7.3	1811.8	Cambisol	4.45
1007	379330	2717.3	40.20016193	16.6094616	3.563157257	126.8858704	157.9224403	12261.275	4.369372017	14.92337655	4.348094869	40.04881468	66.18640519	14978.575	10.86952343	15.22925337	4.063843635	55.80213779	82.82846414	694225	223800	1040	SE	6.9	1949.3	Planosol	4.79
1008	379331	3230.144444	16.13379395	23.5	4.293083865	30.7251836	102.830861	11209.55556	2.33378665	23.5	5.344391006	0.966688994	108.8361397	14439.7	5.420832566	23.5	4.826692534	7.623630344	107.4927657	694250	223850	1057	SSE	6.9	1949.3	Gleysol	4.97
1009	379332	3037.68	27.07401998	22.56147619	3.413137295	119.8860194	147.3003926	11339.54	4.891185568	21.06887801	3.885517325	67.18389852	90.98876661	14377.22	9.578068876	21.38424049	3.734550296	78.31902607	102.8865257	687150	216100	1387	NNW	4.7	2277.2	Planosol	4.37
1010	379333	2646.042857	33.90429585	23.5	5.922031569	0	196.9936571	8273.22987	9.787624083	16.86501354	6.280505798	0	158.1243533	10919.27273	15.63176303	18.47285492	6.162947448	0	167.5434645	686550	215575	1460	N	4.2	2296.8	Cambisol	4.21
1011	379334	2996.1	28.02137245	23.64175929	3.683710329	73.20632017	115.2961873	6387.2	5.237306018	23.94681237	4.053168289	51.91397404	118.7688456	9383.3	12.51228832	23.84940852	3.898354816	58.7126481	117.6600212	686900	216300	1240	NNW	5.7	2246.3	Cambisol	4.81
1012	379335	3677.2	18.75719651	25.9726599	3.313026951	127.587394	152.5488899	11499.3	3.123444933	26.77956136	4.034735566	39.50916067	132.7548509	15176.5	6.911435003	26.58405265	3.726320016	60.85013387	137.5508606	686300	216450	1135		6.2	2040.8	Planosol	4.41
1013	379336	2953.45	10.76033926	23.5	4.109061068	22.07098902	82.75709898	5755.35	4.090566864	23.5	4.209929358	25.76201806	78.23779086	8708.8	6.35251332	23.5	4.173035156	24.51026469	79.7704418	682150	221200	775	NE	8.2	1502.8	Cambisol	4.89
1014	379337	1785.9875	15.80264609	23.5	5.202961739	0.506757849	141.715295	3728.835577	9.153081832	23.5	5.783578182	0.094826186	171.3222104	5514.823077	11.30655774	23.5	5.5027385	0.228231155	161.7339462	682450	221150	837	NNW	8	1527.9	Cambisol	4.35
1015	379338	2852.582692	25.57804807	15.76942673	3.923221417	39.5421426	48.19272122	2425.817308	21.105	16.25	4.08	36.1576	42.2347	5278.4	23.52234986	15.99028588	3.988349134	37.9866936	45.45456742	680750	219300	555	SSE	9.4	1444.2	Cambisol	5.56
1016	379339	2382.5	18.07674292	13.50556978	3.805979754	43.46904219	60.79432553	7279.6	0.934535277	12.93880433	3.926020263	31.17567738	50.96790549	9662.1	5.161495224	13.07855849	3.893197413	34.20699993	53.39092386	NA	NA	NA	NA	NA	NA	NA	NA
1017	379340	2648.633333	19.56837073	17.50793365	4.163859763	11.68846733	78.49810821	5831.233333	6.388411342	17.72767253	5.930352992	0.0660323	99.07237334	8479.866667	10.50508925	17.65903847	4.653158617	3.696227212	92.64613026	680675	219425	570	W	9.3	1471.3	Stagnosol	3.99
1018	379341	3000.171429	23.1492139	20.26929675	3.826871828	40.21938913	57.99651493	9105.828571	5.618347463	22.74975345	3.985233577	38.82755622	57.61217709	12106	9.962937304	22.13503387	3.940285403	39.17248744	57.70742568	676525	245975	560		9.2	1143.3	Cambisol	5.08
1019	379342	2787.2	27.56162396	25.68477146	4.967672515	1.484698045	121.3809201	12432.53333	2.521543016	37.99489726	4.728820192	3.429008497	183.2345958	15219.73333	7.107149878	35.74053564	4.763840222	3.072945616	171.9072905	668800	254900	440		9.5	1104.7	Luvisol	7.23
1020	379343	2474.95	23.86406756	16.15622336	3.775614584	33.56882318	62.92578875	9245.35	2.62284662	26.63423829	3.687628059	59.88952233	106.3593621	11720.3	7.108308576	24.4216189	3.70478111	54.33143812	97.18758985	666700	254425	585	E	9	1141	Luvisol	5.39
1021	379344	2104.735714	20.72943617	13.36887173	4.185921484	8.179199415	48.23312506	7142.214286	11.43740822	15.2205792	4.191633436	7.587561357	69.66815256	9246.95	13.55240431	14.79910457	4.190326696	7.72222649	64.7892392	666940	254325	597	ESE	8.9	1158.3	Luvisol	5.32
1022	379345	2994.666667	9.692103183	15.4336437	3.547939641	35.58786399	54.11190033	12496.93333	0.526581881	20.27419127	3.682499524	31.63541965	122.1202983	15491.6	2.298360208	19.33846956	3.653030504	32.39946296	108.9736587	666450	255500	505	N	9.1	1138.5	Stagnosol	6.1
1023	379346	1808.7625	54.95803954	47.51413605	7.260754627	0.124475049	371.0312841	2235.6975	9.956273182	37.21590577	7.432749733	0.123305478	273.2273567	4044.46	30.08195311	41.82147802	7.347347636	0.123828533	316.9672073	667950	258750	580	SE	9	1175.1	Calcisol	6.28
1024	379347	1135.8	93.75072393	22.25789752	7.074295035	0.135420409	343.0155023	1436.7	23.13765314	13.81307162	7.581778235	0	170.476376	2572.5	54.31445617	17.54159767	7.285344256	0.059790282	246.6551669	616164	130258	1101	SW	7.4	877	Kastanozem	3.41
1025	379348	1458.2	NA	13.92271979	7.631856428	0.111655178	255.2368951	NA	NA	NA	NA	NA	NA	NA	NA	NA	NA	NA	NA	NA	NA	NA	NA	NA	NA	NA	NA
1026	379349	1832.5	34.32494166	23.5	6.979550082	0.163737201	207.5120812	7783.1	8.648924413	23.5	7.73	0.079518074	164.297913	9615.6	13.54215017	23.5	7.455329345	0.095568195	172.5334847	615074	130521	1117	SW	7.5	847.4	Regosol	3.28
1027	379350	1829.98	NA	23.5	7.462085075	0.17382961	240.315906	4068.32	NA	20.90214634	7.708456068	0.095645928	174.6863249	5898.3	NA	21.70814472	7.616130453	0.119902845	195.0482632	NA	NA	NA	NA	NA	NA	NA	NA
1028	379351	470.2428571	NA	23.5	7.607757161	0.29434861	304.6407746	NA	NA	NA	NA	NA	NA	NA	NA	NA	NA	NA	NA	NA	NA	NA	NA	NA	NA	NA	NA
1029	379352	2633.38	19.98495562	23.3712681	5.423140107	0.173990601	103.4933613	3960.42	9.22315661	23.5	6.448364576	0	133.1506745	6593.8	13.52111928	23.44858807	5.76413168	0.069486998	121.30637	616948	131055	1598	S	4.9	987.9	Luvisol	4.33
1030	379353	1241.411111	NA	22.16338038	6.70595808	0.202178631	240.1852983	NA	NA	NA	NA	NA	NA	2478.211111	NA	18.5883545	6.938876916	0.178034324	232.7409264	NA	NA	NA	NA	NA	NA	NA	NA
1031	379354	1693.25	NA	20.27022294	7.563910169	0.03904753	234.4773104	NA	NA	NA	NA	NA	NA	2825.1	NA	19.24487452	7.618699881	0.023403501	202.68729	NA	NA	NA	NA	NA	NA	NA	NA
1032	379355	1680.2	37.77461716	19.2843471	5.696944883	0.160700964	131.6135494	2002.363636	4.734841197	12.01056933	6.934671705	0	91.16572828	3682.563636	19.8095112	15.32929037	6.008781875	0.073321139	109.6203799	615813	131736	1527	S	4.4	1042.5	Cambisol	3.18
1033	379356	1673.85	NA	23.5	7.370557404	0.135280115	227.5791727	NA	NA	NA	NA	NA	NA	2851.733333	NA	23.5	7.491702107	0.079403855	201.3985547	NA	NA	NA	NA	NA	NA	NA	NA
1034	379357	2079.975	22.35434495	15	4.514753041	5.532517679	128.7710576	NA	NA	NA	NA	NA	NA	3451.05	17.38226195	15	4.734361731	3.334491955	135.4577139	617226	131566	1856	SSW	3.6	819.1	Cambisol	3.05
1035	379358	2612.533333	NA	22.35865061	4.509145545	10.71240283	NA	4747.633333	NA	16.43859537	5.083856611	2.829686756	NA	7360.166667	NA	18.5399529	4.787583466	5.627701996	NA	NA	NA	NA	NA	NA	NA	NA	NA
1036	379359	400.4461538	NA	21.14600061	7.573385038	0	193.8601328	NA	NA	NA	NA	NA	NA	1377.292308	NA	22.81557739	7.659233376	0	178.1829639	NA	NA	NA	NA	NA	NA	NA	NA
1037	379360	2771	NA	18.143607	5.392350336	0.307321797	NA	1045.1	NA	18.87874366	7.563448948	0	171.2007217	3816.1	NA	18.34493593	5.530230354	0.223156809	NA	NA	NA	NA	NA	NA	NA	NA	NA
1038	379361	694.9857143	59.78852731	16.43784456	4.820489177	3.262987237	183.6067789	786.3142857	14.64340512	10.95180771	7.671242689	0.198689706	158.784937	1481.3	35.82426989	13.52570715	5.148464005	1.636374853	170.4306708	616762	132117	1905	WNW	3.1	800.7	Calcisol	3.08
1039	379362	1242.33	23.87039064	22.48930638	4.416375465	8.245573227	52.74685893	1013.041429	5.311932836	15.12184878	4.835221196	2.157963197	30.86239063	2255.371429	15.53451905	19.18007772	4.557805078	5.511211568	42.91704875	616383	132195	1819	SSW	3.3	809.2	Cambisol	3.1
1040	379363	1520.95	NA	12.98291035	7.963575716	0.015323581	219.9581403	NA	NA	NA	NA	NA	NA	2704.46	NA	12.44345526	7.998858828	0.008617765	195.2508861	NA	NA	NA	NA	NA	NA	NA	NA
1041	379364	1917.966667	89.42955653	12.07939137	7.766176034	0.177857733	352.4677233	4276.713333	8.578155177	6.057106703	8.069615711	0.0413461	148.7776587	6194.68	33.61097249	7.921697166	7.951330981	0.083612167	211.843185	615210	129989	923	SW	8.4	780.5	Kastanozem	2.91
1042	379365	1194.7	33.68110094	22.08487486	6.05931164	0.163055746	175.7186585	994.5	7.1725	15	7.75	0	152.13	2189.2	21.63889208	18.86638955	6.315030479	0.08898351	165.002908	616975	132495	2034	SW	2.5	821.3	Cambisol	2.24
1043	379366	2432.2	NA	26.10748294	5.879051546	0.106041551	NA	NA	NA	NA	NA	NA	NA	3381.4	NA	23.90179216	6.017298529	0.076274401	NA	NA	NA	NA	NA	NA	NA	NA	NA
1044	379367	1777.8	NA	15	4.335699529	14.49043673	NA	NA	NA	NA	NA	NA	NA	NA	NA	NA	NA	NA	NA	NA	NA	NA	NA	NA	NA	NA	NA
1045	379368	2496.633333	45.73567004	18.05633453	5.661404489	0.23331944	146.9948328	NA	NA	NA	NA	NA	NA	5119.9	30.76430294	17.29914451	5.812544285	0.157692098	129.5132943	617441	132034	2040	SW	2.7	816.5	Cambisol	2.24
1046	379369	985.875	NA	11.32928997	4.978241553	1.581247785	NA	NA	NA	NA	NA	NA	NA	2002.65	NA	11.28903328	5.284169084	0.778424917	NA	NA	NA	NA	NA	NA	NA	NA	NA
1047	379370	1794.042105	27.04346428	12.76666261	7.354735198	0.076358977	188.8165438	NA	NA	NA	NA	NA	NA	3049.85	21.17905682	11.94967949	7.425304547	0.044917363	173.2261706	615904	129903	969	S	8.2	784.8	Calcisol	3.26
1048	379371	1823.625	NA	17.83745493	7.590610443	0.046894893	211.2152986	2398.108333	NA	18.33227978	7.65455757	0	174.07399	4221.733333	NA	18.11853465	7.625772996	0.020256774	190.1175942	NA	NA	NA	NA	NA	NA	NA	NA
1121	438236	1934.385714	23.69109813	20.60492884	5.634693074	0.382773402	103.7188182	3394.214286	5.473255561	15.79352259	6.364815908	0.080291389	64.06420548	5328.6	12.08668769	17.54015689	5.952009051	0.190098258	78.45960321	767170	171430	1132	S	6.6	968.8	NA	4.08
1122	438237	1691.3	21.33650198	25.05785786	6.015652874	0.088879253	158.2785378	1470.2	13.05438512	19.90217998	7.351569738	0.065534621	175.4940706	3161.5	17.48504912	22.66030049	6.27024667	0.078023242	166.2843187	767170	171550	1142	SW	6.6	969	NA	2.24
1123	438238	1198.675	61.09308248	6.74252508	3.702745862	46.7527665	59.54178311	NA	NA	NA	NA	NA	NA	2572.7	43.07366915	4.900911494	3.958360362	31.10642534	38.33264064	788310	186180	2015	SW	1.4	1043.5	NA	3.05
1127	438239	1273.8	45.36158744	10.5320537	3.876176007	64.88751185	104.6482431	1057.457143	20.08708224	4.887902245	4.295806276	22.82609774	36.90502917	2331.257143	33.89708378	7.971869255	4.019446464	45.80847421	73.91995316	785300	189900	1622	NNE	3.4	1223.9	NA	4.26
1130	438240	1041.65	28.65644541	14.99212307	5.148413528	0.257095426	113.0190914	903.4833333	3.152558411	3.315621022	6.018672613	0	52.27998134	1945.133333	16.81029767	9.568574562	5.371613738	0.137678711	84.8067459	784750	190200	1610	N	3.4	1238.8	NA	3.26
1131	438267	1307.233333	43.51128437	3.639922738	3.392240167	33.92692878	46.93369453	1346.733333	18.98309131	3.001148458	4.416672358	13.90215917	17.71674066	2653.966667	31.06465661	3.315782037	3.659423122	23.76552583	32.10779405	784440	187750	1658	ENE	3.2	1045.4	NA	3.8
1132	438268	1436.209091	33.35921622	7.285657951	3.571178914	62.82646655	86.36333865	2091.957576	10.45207427	2.805797093	4.486995889	12.31132514	19.81747079	3528.166667	19.77687341	4.629411876	3.890802272	32.87449921	46.90626489	784425	187700	1665	SE	3.2	1045.3	NA	4.28
1133	506787	2011.28	56.91158347	33.14154767	7.132013591	0	345.9941226	1806.864444	24.28571181	20.26854207	7.357321814	0	263.6304336	3818.144444	41.47200848	27.04964191	7.224357852	0	307.0170688	600919.01	248936.22	NA	N	8.6	1217.7	NA	4.61
1134	506788	695.8	142.3114889	47.19205231	7.109227859	0	551.6185209	1361.55	31.87906207	32.31804561	7.570770872	0	280.002943	2057.35	69.22753589	37.34846526	7.355753617	0	371.8638899	681698.69	281841.13	NA	SW	9.1	948.7	NA	4.73
1137	438241	892.2666667	67.89704076	25.90464174	4.992285639	1.296879375	293.0160416	582.7333333	30.52890602	23.6256378	7.556675851	0.141031461	259.3729984	1475	53.13388298	25.0042678	5.209810341	0.840234556	279.7245686	732750	170320	1144	ENE	5.1	1150	NA	4.74
1138	438242	1511.933333	29.90293175	19.4309802	4.827254259	2.130431104	148.6841886	1932.716667	14.76106491	13.24154299	7.260328132	0.033633551	173.799777	3444.65	21.40716631	15.95822435	5.182823457	0.953964532	162.7759879	732750	170840	1095	SE	5.3	1152.4	NA	4.3
1139	438243	1604.5	20.80662937	3.67197881	3.306663317	10.12346275	25.30291095	648.7	50.32574894	6.51682596	4.259089358	35.65241821	47.51365497	2253.2	29.30523263	4.491015001	3.434961106	17.47329118	31.69742082	727740	158750	1914	NW	2.2	1426.7	NA	2.33
1140	438244	1195.4	130.668892	1.45	5.025215989	1.61629207	219.1792943	4873.633333	5.724280901	2.089594006	5.058502521	1.111709752	19.75092287	6069.033333	30.33426077	1.963615018	5.051741273	1.211095876	59.03175429	729840	160580	1696	NNW	2.7	1343.7	NA	2.91
1141	438245	1581.2	42.55305148	7.38889451	7.060658814	0.21782008	223.6339492	4791.366667	10.11921223	3.997367487	7.324464329	0.177760473	147.0167759	6372.566667	18.16689369	4.8388938	7.242626481	0.187700307	166.0274949	733600	166420	1294	ENE	4.1	1213.6	NA	4.78
1142	438246	1145.2	162.5195507	8.402095704	3.907689019	38.35029123	68.91122015	NA	NA	NA	NA	NA	NA	NA	NA	NA	NA	NA	NA	731680	162150	1636		2.7	1376.2	NA	2.38
1143	438269	1844	21.57801777	18.02725597	4.183582773	13.34641543	69.07099357	4665.133333	3.997344671	14.99999786	5.73297966	0.244647201	158.6240604	6509.133333	8.977848146	15.85760265	4.701392846	3.956302714	133.2541921	611500	232125	480	SE	9.1	1336.8	NA	3.82
1144	438270	1888.3	31.59643121	20.80002648	3.795807207	48.83736201	62.14274472	6574.628571	2.449419763	21.89549002	3.816052334	55.29472324	67.1501021	8462.928571	8.952877905	21.65106355	3.81145262	53.8539176	66.03283012	611250	231900	480		9.1	1339.5	NA	4.23
1145	438271	2198.133333	25.5070562	12.1215357	3.349942436	38.55969701	63.23039556	11900.55238	1.717780675	10.18130259	3.973992564	18.75884533	37.43788139	14098.68571	5.426778845	10.48380533	3.797865911	21.84600629	41.45920552	611400	231350	447		9.2	1289.1	NA	4.72
1146	438272	1288.2	94.5947512	49.61052632	7.099328685	0.165611854	469.5294184	3544.157143	11.34350259	31.53271662	7.400150884	0.06238369	266.601878	4832.357143	33.53645218	36.35186259	7.297606409	0.089902045	320.6978916	611675	234800	725	SW	8.3	1329.8	NA	4.7
1147	438273	1652.42	43.37869386	35.90068869	6.925021626	0.143537515	284.0193898	1630.855	10.63496637	18.70412544	7.651783013	0	185.9777916	3283.275	27.11436276	27.35888176	7.149433591	0.072240144	235.320566	606710	258940	379	NNE	10	967.8	NA	3.51
1149	438247	941.45	99.7120402	52.91811036	6.40505596	0.305859382	441.050243	2207.334615	77.75790181	50.63647089	7.006590125	0.288153343	453.4298232	3148.784615	84.32193401	51.31865457	6.728862214	0.293447243	449.7284726	668896	194499	1476	ENE	4.6	1750.9	NA	3.75
1150	438248	2387.01875	34.49940954	27.90009478	5.023945326	1.075450641	199.3878246	1411.08125	21.69485284	29.32386822	5.237998281	0.756146803	229.160162	3798.1	29.74222309	28.42905927	5.091761679	0.956821943	210.4489307	671150	203673	914	SSE	7.5	1690.2	NA	3.15
1151	438249	2377.05	35.52525178	11.97865001	3.353956871	39.40591885	60.88111433	3572.083333	4.678759617	27.36025755	3.55687307	45.22957762	85.77001851	5949.133333	17.0038581	21.21434551	3.464163695	42.90266254	75.82534819	662327	204997	1299	ESE	5.4	1788.3	NA	3.37
1152	438250	2085.9	85.47405724	50.57749173	6.208006365	0	385.6576902	6119.8	17.39386622	30.06998023	7.168188519	0.183904213	234.2904363	8205.7	34.69994254	35.28301729	6.681741735	0.137155514	272.7681963	676664	199972	1185	ENE	5.7	1789	NA	4.45
1153	438251	3658.817647	14.88667965	14.30933474	3.680955449	46.36023889	59.02493975	9443.382353	1.542744406	14.8808963	3.614896966	56.35455563	78.4857329	13102.2	5.269067141	14.7212865	3.632355776	53.5636211	73.05126438	651900	244305	490	ENE	9.4	1150	NA	4.33
1155	20065	2656.9	15.36332017	18.02688472	4.107431911	18.42147497	71.34726243	6705.45	2.810077689	20.73102886	5.004323226	2.712196747	144.2359458	9362.35	6.372506988	19.96363173	4.533864873	7.170263505	123.5511879	662000	247000	470	W	9.4	1128.3	NA	6.22
1156	438274	3015.9	12.94978512	14.81195	3.823045682	28.04651271	39.70698491	8057.4	0.461209535	22.91998573	3.957129728	32.28565165	73.60185432	11073.3	3.862570927	20.71169868	3.91632411	31.13108895	64.37032112	599475	222350	560	NW	9	1163.7	NA	5.79
1157	438275	2595	12.65444321	13.71617919	4.022605081	13.37864421	50.43213216	10713.53333	0.811330566	18.21782792	4.81849917	2.374482939	102.0810713	13308.53333	3.12059159	17.34006189	4.512347718	4.520158783	92.01016467	580900	196725	545	ESE	9.3	1066.7	NA	4.8
1158	438276	3144.84	16.90001874	24.73601868	4.005929556	31.01444176	84.1041781	12420.635	4.740868598	38.43013976	4.524486679	9.880488875	180.3572521	15565.475	7.197496599	35.66338708	4.358721088	14.15038108	160.910334	NA	NA	NA	NA	NA	NA	NA	NA
1159	438252	2217.259091	23.845253	21.18366206	7.073815164	0	242.0402118	9330.840909	2.270990386	14.12226658	7.692352039	0.0355485	208.6952105	11548.1	6.413293442	15.47806912	7.486686605	0.028723115	215.0975197	677900	246680	634	S	8.9	1224.4	NA	5.37
1160	438253	3179.75	31.31932078	36.922968	5.78799708	0.130836934	239.9485994	13299.07	4.093067203	38.51200223	6.70279544	0	252.5420065	16478.82	9.34663996	38.20538248	6.323870604	0.02524627	250.1119851	NA	NA	NA	NA	NA	NA	NA	NA
1161	438254	2994.86	27.09466266	29.9783479	6.869222752	0.205585232	292.6955512	NA	NA	NA	NA	NA	NA	15780.85	8.161519896	18.90703337	7.300446376	0.186211363	242.9232528	677940	246590	642		8.9	1232	NA	6.64
1162	438277	2602.321739	28.19561981	15.07184304	3.552543822	47.16630602	73.9134877	8305.778261	3.847459125	12.99392144	3.879736195	14.70142112	38.26311817	10908.1	9.656146967	13.48964668	3.776550358	22.44649824	46.76814944	760175	233800	635	SW	8.8	1404.7	NA	4.27
1163	438278	2800.375	18.8010101	19.73549078	4.149877508	14.38245466	57.68537713	4108.025	4.626907622	16.98048576	4.619201973	3.76715787	44.08362475	6908.4	10.37249303	18.097249	4.366572492	8.07015303	49.59720348	760050	233825	605	NW	8.8	1430.2	NA	3.06
1164	211862	2690.02	27.82507142	19.99633943	4.306213657	10.99136966	58.67718143	11397.34667	9.550009487	17.75424883	4.331530317	8.114909055	41.96207558	14087.36667	13.039681	18.18238197	4.326580664	8.664176832	45.15386934	760000	234000	570	NNE	8.8	1408.3	NA	5.56
1165	438255	2993.1	47.64	31.2	3.75	63.336	81.9884	NA	NA	NA	NA	NA	NA	NA	NA	NA	NA	NA	NA	747080	226050	1269	SE	5.8	2065.2	NA	3.18
1166	438256	2852.45	27.54755868	46.36432102	3.565725606	90.84165846	122.9718057	4819.216667	5.720010081	37.98283763	4.490822913	20.74456008	167.6604343	7671.666667	13.8358464	41.09920899	3.915943767	46.80779731	151.0444779	747110	226050	1266	SE	5.8	2064.7	NA	4.62
1167	438257	3471	11.77838029	31.29256266	3.290946993	110.4645206	133.5438708	2430.3	7.676193886	30.83577542	3.747025495	53.33300685	72.1751386	5901.3	10.08899937	31.10444648	3.426278457	86.93636277	108.2707225	747140	226050	1263	SE	6.1	2019	NA	4.29
1168	438258	2861.775	25.96198238	32.99097588	4.61420722	7.782568372	119.5591837	4388.825	8.035	28.8	5.38	0.3391	115.0319	7250.6	15.11068891	30.4541569	4.916549775	3.276999167	116.8187959	747160	226050	1261	ESE	6.1	2018.6	NA	3.91
1169	438259	1967.4	123.7270641	51.50580462	6.00682324	0.420750056	392.1119842	7527.56	82.76130827	43.55482932	5.486265417	0.644309633	268.1431536	9494.96	91.24960397	45.20230849	5.554152113	0.597987046	293.8300735	747170	226070	1260	SE	6.1	2019	NA	3.18
1170	438279	136.34	117.4839071	27.28936482	7.284590271	0.19599821	414.1000213	611.56	86.47098012	17.62713062	7.54051105	0.199579083	394.7983174	747.9	92.12454673	19.38852788	7.481202205	0.1989263	398.316962	747175	224200	1305	NNW	5.4	1992.4	NA	4.54
1171	438280	1332.4	119.05	32.1	7.12	0.2313	433.339	1408.1	39.19790959	25.50506001	7.546480917	0.179805994	307.4737942	2740.5	78.02108976	28.71144499	7.288360031	0.204841795	368.6680289	747210	224240	1294	NW	5.4	1992.9	NA	4.47
1172	438260	2690.025	26.44741448	11.01421316	3.830920403	30.23108144	39.78752237	10680.925	1.922333775	20.22454176	3.987758399	37.65870697	67.62702997	13370.95	6.856394572	18.3715684	3.951326769	36.16438544	62.02615857	656540	246680	460	SW	9.4	1134.8	NA	4.03
1173	438261	2190.525	37.47184043	13.95410404	5.818562943	0.168725616	145.1743178	7659.835	32.55641562	11.83655369	6.567549631	0.105463775	156.748176	9850.36	33.64950876	12.30745496	6.261072887	0.119531956	154.1743791	656420	246700	459	NNW	9.4	1134.7	NA	3.65
1174	438262	1555.44	35.11801567	13.44303155	4.015363608	34.52705111	67.0658624	2770.917143	10.90194185	9.135559655	4.475257493	17.2326559	46.99467829	4326.357143	19.60826188	10.68420991	4.250697003	23.45044912	54.21080067	778120	198140	884	NE	7.6	1177.2	NA	4.49
1175	438281	3014.2	14.89583322	19.95513569	4.763676367	2.487443939	89.28414851	12048.76667	5.077563908	23.70208458	5.677168262	0.179752231	98.94527412	15062.96667	7.042265019	22.95229514	5.289858184	0.641536719	97.01201851	698240	278260	440	NNW	9.4	898.7	NA	3.66
1176	438282	2039.2	31.23173352	27.11681051	7.217110324	0.15721584	229.8043908	4006.42381	1.533844219	13.55482354	7.673011269	0.117986676	151.5623746	6045.62381	11.55099675	18.12930662	7.461797554	0.131218745	177.9535502	698790	279250	440	SW	9.4	897.4	NA	4.41
1177	438263	2227.688889	14.70635063	16.39464592	3.773118838	31.71563709	45.10527003	8140.061111	3.338043872	14.79273408	3.817518049	26.01755551	41.03428934	10367.75	5.780719539	15.13693231	3.807587816	27.24188606	41.90900936	748290	214530	440	NW	9.3	1254	NA	4.22
1178	438264	3040.9	22.41225476	27.35503469	3.574453359	94.77746551	126.5609694	8949.2	4.049530964	34.64130649	3.792278562	101.904493	151.4604142	11990.1	8.706640312	32.79337996	3.725885402	100.0969536	145.1454775	684950	233875	615	ENE	8.9	1368.1	NA	7.11
1179	438265	1854.6	15.06962283	14.19789982	4.244991194	9.295666548	60.54184482	5725.2	8.538180675	13.04882188	7.001305284	0	171.4631538	7579.8	10.136272	13.32997441	4.854055328	2.274432463	144.3233006	656670	267860	459	SW	9.4	1100.2	NA	5.05
1180	438266	631.55	93.80874	74.56746497	6.876272174	0	458.8332122	114.45	58.155	75.55	7.02	0	460.1747	746	88.3388063	74.71820375	6.89546302	0	459.0390209	654470	263500	594	SW	8.8	1160.5	NA	3.61
1181	438283	2695.8	21.69033752	32.60275799	3.939040835	34.26004248	145.4858109	10743.42222	3.564673714	33.40161877	4.853871807	2.339937862	150.7432007	13439.22222	7.200536242	33.24137372	4.465039296	8.742854385	149.6886106	735650	249310	783	NNE	8	1513.2	NA	4.22
1182	438284	2687.7	56.34209956	33.78036053	6.362745044	0.177872285	276.6610932	8721.4	1.733347226	21.25782042	6.831232517	0.136991396	189.7910586	11409.1	14.59781013	24.2078192	6.667701659	0.146621916	210.2554766	735650	249030	824	WNW	8	1536.4	NA	4.42
1183	438285	2671.4	34.45574025	27.86025492	7.445196328	0.18536674	266.9979868	7857.2	2.564441531	23.05709413	7.177331341	0.146377442	161.8666658	10528.6	10.65615509	24.27579023	7.231270539	0.156270117	188.5414194	735620	249000	824	WNW	8.2	1510	NA	4.62
1184	438286	2408.977778	30.16404598	25.34798624	3.46765114	106.4046618	131.5632727	11771.12222	1.430534805	12.51659457	3.835050153	94.68299985	145.2646754	14180.1	6.311910106	14.69644784	3.746564809	96.67432736	142.9370209	738500	248510	833	NW	8.2	1553.7	NA	4.92
1185	438287	2653.4	29.18234432	25.13679807	3.41413879	101.0991317	125.1275532	3398.3	3.717881479	18.98655357	3.934680804	58.25918911	95.45859541	6051.7	14.88291043	21.68316093	3.630358387	77.04258943	108.4671075	738650	248520	825	NW	8.1	1566.3	NA	4.14
1186	438288	2043.331579	17.9543944	17.3858053	3.823825155	41.11318174	65.70452139	4452.168421	5.150460272	20.40796223	4.227273282	19.064811	115.084819	6495.5	9.178276904	19.45726272	4.056453617	26.00071004	99.55093839	666650	246300	360		9.6	1090.3	NA	6.61
1187	438289	2298.9	27.47475243	16.59555657	3.572021782	40.18631117	54.68877791	7340.1	8.699316571	23.80991472	3.754299888	40.64954071	64.19462226	9639	13.1772551	22.08929142	3.703385692	40.53906054	61.92747986	646680	238950	565	SW	9	1223.3	NA	4.44
1188	438290	3070.8	17.17607173	23.34479777	3.415282984	87.22265608	110.5788628	7185	4.391178287	25.65317884	3.649844118	68.62990802	85.08758328	10255.8	8.219241509	24.9620015	3.565469061	74.1969638	92.72020299	758100	243775	520	N	8.9	1413	NA	4
1189	438291	2603.325	39.17952465	37.25758117	6.519536775	0.280713555	293.3893811	10834.66071	7.002819892	34.15357172	7.044006378	0.09754561	174.2282839	13437.98571	13.23637466	34.75490778	6.881321403	0.133030518	197.3132216	758000	243900	512	NE	9.1	1398.3	NA	4.35
1190	438292	3064.5	16.25610634	46.84007016	3.997449973	38.69678311	161.1802143	12309.2	4.4188736	35.18069899	4.647443691	5.531618201	137.5630381	15373.7	6.778435691	37.50480724	4.41928849	12.14256078	142.2707426	757900	244020	501	NNE	9.1	1400.5	NA	4.22
1191	438293	2980.8	14.03497245	18.61989063	4.757090254	4.290909397	69.23133212	12254.95	0.516538842	33.09515502	3.931332328	29.54711455	119.83698	15235.75	3.161354285	30.26314031	4.010386623	24.60586149	109.9362324	656200	252485	437	W	10	1103.6	NA	3.86
1192	438294	2280.366667	19.55777231	26.96103258	4.947701456	1.098088427	150.4509715	741.6333333	8.519794598	31.75871275	7.055920084	0.230107785	282.3919571	3022	16.84892645	28.13843812	5.068891719	0.885076059	182.8307971	655720	253130	531	S	9.1	1156.9	NA	5.23
1193	438295	799.88	131.4009323	60.31984423	7.11424016	0.302916723	587.6863531	721.22	84.61372993	53.66098833	7.286773075	0.221584956	515.1005928	1521.1	109.2170745	57.16258957	7.18761344	0.264353777	553.2702713	656700	253100	595	NNE	8.8	1200.7	NA	4.02
1194	438296	2722.933333	46.94613481	62.70322667	6.200630514	0.122591797	422.4170252	8499.046667	5.568263339	46.33984768	7.542404635	0	254.0862999	11221.98	15.60830845	50.31030478	6.757963218	0.029746024	294.9305487	656660	253200	585	NNE	9.1	1150.1	NA	2.99
1195	438297	2742.675	23.95024162	8.209752796	4.033765414	21.64572072	31.04623524	6581.525	2.887849226	12.75054888	4.022524438	25.84497855	34.9774786	9324.2	9.08326514	11.41489243	4.025800828	24.60978417	33.82111957	591050	196320	630	NNW	8.7	1138.7	NA	5.17
1196	342907	2635.1	17.92123237	8.337812607	4.063681533	23.81369168	27.81472039	6051.333333	4.315259359	9.669725405	4.127640373	24.86825837	29.26830305	8686.433333	8.44274162	9.265678856	4.107223943	24.54834701	28.82734696	592050	196100	640		8.7	1136.4	NA	5.52
1197	438298	2561.36	16.39723918	11.46715339	4.014326778	21.46926893	30.4045757	6193.603158	3.775380117	14.78401232	3.950785938	26.54826846	34.88706903	8754.963158	7.468042708	13.81362905	3.968433305	25.06235173	33.57566669	589212	196718	610		8.8	1103.8	NA	5.7
1198	438299	3251.233333	13.39341465	43.03792048	6.314933283	0.181046228	263.2620821	10459.56667	3.724727761	38.02347325	6.204000126	0.178997534	225.8664654	13710.8	6.017457369	39.21254595	6.227858155	0.179483339	234.7340644	665400	268725	500		9.2	1121.3	NA	5.56
1199	438300	2191.533333	38.83590751	42.7654055	7.488474852	0.216132972	332.2858737	4687.566667	1.853893776	34.70397221	7.647214905	0.171797891	228.5742787	6879.1	13.6355681	37.2721715	7.590091614	0.185922094	261.6145627	665450	268600	510	SE	9.2	1128.5	NA	4.5
1200	438301	59.4	376.8124	3.5	3.31	10.2822	320.2934	NA	NA	NA	NA	NA	NA	59.4	376.8124	3.5	3.31	10.2822	320.2934	747060	224250	1222	NW	6.1	1950.6	NA	3.98
1327	506813	3075.742857	17.2190662	19.50806867	5.034720428	0.631338345	117.4880269	10155.95714	5.267528207	18.70840626	6.021849192	0.031599574	134.4310595	13231.7	8.045694097	18.89428985	5.541239848	0.171010402	130.4926078	NA	NA	NA	NA	NA	NA	NA	NA
1330	506814	3034.454545	25.6405126	42.69527397	4.605966692	3.647957527	162.8952544	9152.745455	6.9435098	48.85130959	5.840288121	0	192.9965419	12187.2	11.59882071	47.31853666	5.139437032	0.908294054	185.5017122	NA	NA	NA	NA	NA	NA	NA	NA
1452	506815	1983.85	39.26021083	35.37207702	6.106039826	0.049287799	261.5252799	980.15	9.515084681	20.19416926	7.547598748	0	217.5936446	2964	29.4239472	30.35297233	6.27271512	0.032989069	246.9977521	NA	NA	NA	NA	NA	NA	NA	NA
1463	506816	1322.666667	45.11098488	13.54854461	3.564394596	41.71733578	74.90608541	4917.433333	4.65461806	23.12934187	4.029213079	25.05592864	83.82603334	6240.1	13.22984728	21.09857294	3.881177086	28.58752074	81.93533963	NA	NA	NA	NA	NA	NA	NA	NA
1464	506817	394.4	170.2262677	18.86064909	7.30995219	0.167835497	546.7981135	872.8	35.00206233	34.2216659	7.584940268	0.010181324	294.9811262	1267.2	77.08888889	29.44074337	7.479427178	0.059249195	373.355984	NA	NA	NA	NA	NA	NA	NA	NA
1465	506818	165.5	121.9619668	37.41806647	6.859506618	0.183163202	436.6328113	787.3	27.07782294	37.6131462	7.50549744	0.010827994	310.9278677	952.8	43.55906329	37.57926113	7.302721814	0.040762374	332.762637	NA	NA	NA	NA	NA	NA	NA	NA
1466	506819	622.62	72.95148245	54.1239761	6.907315019	0.125952347	391.9245125	841.5466667	36.69382724	51.33296628	7.182210931	0.040140281	320.0710402	1464.166667	52.11197723	52.51981104	7.04372835	0.076630873	350.6259012	NA	NA	NA	NA	NA	NA	NA	NA
1467	506820	903.94	44.00562316	42.19509591	6.424601003	0	312.0232348	1030.302857	11.3324562	28.07731153	7.683167717	0	211.3505842	1934.242857	26.60178106	34.67505078	6.728503185	0	258.3984693	NA	NA	NA	NA	NA	NA	NA	NA
1468	506821	1101.4	30.01005084	26.22923552	6.334909453	0.163977483	198.8973192	1813.5	8.241009098	18.61760959	7.498035755	0.094297414	193.7999934	2914.9	16.46647912	21.4936756	6.711055527	0.120626148	195.7260267	NA	NA	NA	NA	NA	NA	NA	NA
1469	506822	1158.333333	50.07129784	37.38122014	7.189089907	0	317.6616924	1339.466667	7.870159765	13.63034043	7.745274444	0	169.7599425	2497.8	27.44057571	24.64460725	7.401811827	0	238.3481109	NA	NA	NA	NA	NA	NA	NA	NA
1470	506823	286.9	60.99194841	12.01892646	7.537815616	0.141676926	269.851196	NA	NA	NA	NA	NA	NA	1345.3	18.47503902	6.142830595	7.722598469	0.03021416	157.4641144	NA	NA	NA	NA	NA	NA	NA	NA
1471	506824	2576.18	14.74978977	15.02753728	3.596069747	42.92265205	56.86824938	10135.82	0.571521752	14.95621509	3.781636038	33.94735972	77.99895754	12712	3.444851715	14.97066905	3.737083098	35.76626851	73.71666461	NA	NA	NA	NA	NA	NA	NA	NA
1472	506825	2746.9	13.71401398	19.61334231	4.310413919	10.97772758	63.20008896	6211.1	7.099618103	24.68114344	6.127104502	0	139.4353041	8958	9.127870395	23.12714222	4.809057768	3.366233521	116.0583771	NA	NA	NA	NA	NA	NA	NA	NA
1473	506826	2822.575	19.51911978	14.12981542	3.827446589	30.42279519	56.52756578	4554.425	1.758897446	18.33779374	3.861679925	31.71003837	58.00283217	7377	8.554283042	16.72774434	3.848261014	31.21751561	57.43836829	NA	NA	NA	NA	NA	NA	NA	NA
1474	506827	2633.46	16.10759222	15.08391698	3.651553693	47.62405622	61.42940625	10237.74909	0.710310356	13.56140863	3.638158934	56.23055493	67.29290224	12871.20909	3.860606929	13.8729151	3.6408661	54.46965819	66.09322613	NA	NA	NA	NA	NA	NA	NA	NA
1475	506828	3018.922222	9.012907219	10.06526575	3.855100341	22.56649922	33.26927224	11998.37778	1.206651631	16.92773343	4.099960645	15.1059078	62.3679583	15017.3	2.775940282	15.54817411	4.038413383	16.60570771	56.51826029	NA	NA	NA	NA	NA	NA	NA	NA
1476	506829	2251.3	21.14653356	13.49665749	3.742780543	34.78475306	49.2524634	4097.8	6.276801698	28.71746059	3.619844208	81.33856573	141.7942868	6349.1	11.54939582	23.32038163	3.659572036	64.83124997	108.9802805	NA	NA	NA	NA	NA	NA	NA	NA
1477	506830	2763.4	31.69422595	33.53150105	4.83787263	3.616681725	188.499373	2545.128571	14.80302278	30.62410459	6.583867086	0	228.6023864	5308.528571	23.59588321	32.13757471	5.114282858	1.882694639	207.7264194	NA	NA	NA	NA	NA	NA	NA	NA
1478	506831	3213	18.9528836	28.49261905	6.203521803	0	176.0765537	3581.7	6.473017561	25.97908116	6.856770679	0	183.9179402	6794.7	12.37435383	27.1676542	6.432670474	0	180.2099951	NA	NA	NA	NA	NA	NA	NA	NA
1479	506832	1619.6	12.92626327	14.78340331	3.709233463	36.95809195	55.78811273	2755.666667	3.901019354	16.24006955	3.854824345	28.57135382	74.97407694	4375.266667	7.241909446	15.7008529	3.795098862	31.67588712	67.87197552	NA	NA	NA	NA	NA	NA	NA	NA
1480	506833	2964.662963	16.63226979	25.32483269	4.436006653	9.595551422	70.64597205	12408.43704	1.74088789	44.83647899	5.628613111	0.566676508	215.4493842	15373.1	4.612652751	41.07370797	5.047461869	2.307871911	187.524417	NA	NA	NA	NA	NA	NA	NA	NA
1481	506834	3163.330435	17.49040936	21.8496834	4.724303354	1.669803367	106.4809816	10940.60957	5.655783014	33.67268682	5.602720589	0.110200691	181.7204582	14103.94	8.310135891	31.02094082	5.209862861	0.459999302	164.8452215	NA	NA	NA	NA	NA	NA	NA	NA
1547	506866	2403.575	28.57948332	16.69010744	3.475185745	96.02965082	118.9972116	9604.872059	5.577925816	13.37760481	4.026252867	49.00913108	54.92316626	12008.44706	10.18184906	14.04062547	3.846765979	58.42061827	67.74803636	NA	NA	NA	NA	NA	NA	NA	NA
1548	506867	2745.5	14.3307811	31.81595338	3.380311595	152.3910322	176.5650316	10500.8	2.709698023	30.31179577	4.172986144	21.70546075	137.2526317	13246.3	5.118346746	30.62355563	3.855211577	48.79206127	145.400733	NA	NA	NA	NA	NA	NA	NA	NA
1549	506868	2003.94	71.93008274	20.99543749	6.198565217	0	257.04661	9090.526667	44.06186248	24.12038664	5.599153413	0.135188858	150.8906515	11094.46667	49.09556468	23.55594215	5.662234063	0.110770346	170.0650902	NA	NA	NA	NA	NA	NA	NA	NA
1550	506869	2511.609091	47.51706646	30.12900404	4.068582722	24.79523021	151.8422212	NA	NA	NA	NA	NA	NA	10711.1	15.11297458	34.98683002	4.482248228	8.461848933	165.4416605	NA	NA	NA	NA	NA	NA	NA	NA
1551	506870	2762.791667	41.62452343	30.14071727	3.89431429	38.36885191	132.1512309	NA	NA	NA	NA	NA	NA	11055.5	14.30767695	38.37268192	4.493260079	9.588453197	201.9587246	NA	NA	NA	NA	NA	NA	NA	NA
1552	506789	2414.14	41.48178001	34.18919947	7.610649133	0.068711259	258.4247609	6934.915556	3.184169356	10.81713763	8.035270081	0	129.6975133	9349.055556	13.07348847	16.85233862	7.880469559	0.017742819	162.9378332	768467.18	172649.1	NA	SW	4.7	1032.2	NA	2.56
1553	506790	1974.8	64.95306461	20.84567804	7.77256593	0.088953494	369.5689331	963.6545455	11.92	18.4	7.88	0	205.262	2938.454545	47.56108084	20.0436276	7.804957292	0.059781548	315.6851243	768467.86	172549.91	NA	SSW	5.4	1011.7	NA	3.25
1554	506791	463.05	109.7487647	15.44247921	7.590431026	0.286613821	442.6622716	2340.85	13.22012132	14.27749749	8.026400098	0.08713795	186.5934503	2803.9	29.16134188	14.46988837	7.91732805	0.120080388	228.8819298	769658.52	172462.74	NA	SE	5.9	1001.2	NA	3.01
1555	506792	1729.54	17.8295245	11.56259757	7.269416484	0.050282994	178.3532022	1446.726667	14.2325663	7.639764941	7.590787078	0	151.3827491	3176.266667	16.19118116	9.775824868	7.38755306	0.027380085	166.068694	744765.71	185972.9	NA	NE	8.1	1066.8	NA	2.95
1556	506793	1406.34	65.22606937	10.6578331	7.472087394	0.07578363	312.6249994	2232.46	26.53523494	8.129410157	7.592401955	0	198.6710622	3638.8	41.48864488	9.106606574	7.541878951	0.029289202	242.712499	744820.87	185928.57	NA	S	8.1	1066.7	NA	3.28
1557	506794	1143.6	23.67903681	5.77809986	7.765306027	0.192490364	188.2991446	3907.228571	4.88807624	4.703617471	8.039658999	0.167303079	142.2958955	5050.828571	9.142693518	4.946899943	7.960680692	0.173005941	152.7118728	823415.75	189147.86	NA	SW	6.2	703.8	NA	3.1
1558	506795	1538.2	19.6964439	20.02391757	6.960459875	0.327435769	175.3129349	6282.9	0.885667287	15.76938754	7.811812491	0	129.5453555	7821.1	4.585241079	16.60613916	7.469388023	0.064397808	138.5466073	767180.82	171630.05	NA	N	6.7	962.9	NA	3.85
1559	506796	1718.9	15.01	25.2	6.27	0	249.4278	4381.9	3.810428353	8.983841484	7.69132158	0	128.6203434	6100.8	6.96590693	13.55274308	6.780077967	0	162.6578364	766569.78	171570.43	NA	S	5.5	1007.5	NA	3.71
1560	506797	2090.52	12.35314659	21.09269081	4.970210468	8.381255066	159.30408	4149.513333	5.173687758	7.33068167	7.282824725	0	91.64099087	6240.033333	7.578931683	11.94119476	5.440966451	2.807866626	114.3093059	817742.09	184304.12	NA	N	4.1	781.8	NA	3.75
1562	506798	653.4333333	44.00486864	15.29518951	7.546462434	1.074618089	264.4992909	2494.216667	21.36485383	17.55559427	7.753564334	1.014359301	212.7570187	3147.65	26.06478563	17.08634775	7.701700211	1.026868666	223.4984052	755873.2	191312.5	NA	SE	9.5	1011	NA	5.85
1563	506799	2062.433333	45.82160336	15.35304576	7.5478592	1.048421832	266.0741276	6490.233333	25.60625887	14.41969678	7.587660088	0.991208289	200.264113	8552.666667	30.48108937	14.64476927	7.577723308	1.005005052	216.133873	755611.7	191266	NA	SE	7.9	1060.1	NA	3.1
1564	506800	1151.314286	32.63239205	9.249324995	7.602974218	0.20351082	269.930621	1399.985714	15.22924601	6.686443229	7.588524282	0.164417239	202.653929	2551.3	23.08268961	7.842983969	7.594985583	0.182058833	233.0135953	745419.53	185368.84	NA	WSW	7.6	1085.2	NA	2.78
1565	506801	2038.2	45.23709621	12.98542832	5.490453531	0.31667958	242.7403404	7482.525	28.98777236	14.58265809	7.663761147	0.162456629	204.8781386	9520.725	32.46643306	14.24072261	6.149308982	0.19547273	212.9836915	745823.16	184873.23	NA	SSW	7.6	1072.1	NA	6.5
1566	506802	1313.1	90.76186429	44.19547635	7.363459036	0.242091707	410.1012591	3572.042857	18.36322257	21.1656763	7.674859813	0.167196412	209.2005409	4885.142857	37.82358621	27.3559621	7.567044114	0.187327862	263.2015683	682046.26	282264.91	NA	N	9.3	945.6	NA	4.66
1567	506803	2345.8	40.1511122	22.67607426	7.205853912	0.209627568	236.6258041	7362.511765	7.40227583	18.07569404	7.774025743	0.153782142	185.4123143	9708.311765	15.31531182	19.18727473	7.555927883	0.167275961	197.7869276	582517.03	117569.18	NA	S	8.6	814.6	NA	4.7
1568	506804	2544.94	19.07482208	29.96000849	5.518853362	0.259918365	140.3501298	5479.01	5.093758462	19.04690647	6.596697051	0.104137688	147.1656969	8023.95	9.528104144	22.50819297	5.945695999	0.153546331	145.0040172	582544.58	117639.43	NA	NE	8.5	869.6	NA	6.35
1569	506805	2190.9	16.11029714	14.52785157	6.901094937	0.157141243	189.8578301	6360.62	7.444800633	7.607790907	7.702527993	0.170415551	163.3933179	8551.52	9.664901421	9.380710915	7.32857641	0.167014672	170.1735277	578971.97	113217.66	NA	SE	9.4	828.2	NA	4.69
1570	506806	2093.5	32.59816647	21.52049916	7.377650482	0.217558295	254.4100475	6470.25	12.461747	17.07442178	7.638771899	0.153263571	215.2217816	8563.75	17.38430944	18.1613128	7.55903556	0.168981102	224.801771	578896.9	113330.15	NA	SE	9.4	828.6	NA	5.97
1571	506807	1512.833333	34.27607315	21.8982373	7.318696489	0.184436785	241.2634525	4893.166667	6.383031813	8.63307129	7.741216955	0.143252031	163.6357201	6406	12.97021925	11.7657571	7.598634293	0.152978174	181.9681929	585778.5	118884.87	NA	S	8.8	809.8	NA	3.29
1572	506808	1064.54	83.18486144	29.62908298	7.550878536	0.094757961	317.5029425	5130.76	23.68181626	22.53588864	7.711644674	0	199.2825807	6195.3	33.90623989	23.75471406	7.679437613	0.016282285	219.596416	585754.05	119484.58	NA	NW	9.2	771.5	NA	5.01
1573	506809	1295.233333	42.9149152	14.36704326	7.596161616	0.06281926	249.3305249	NA	NA	NA	NA	NA	NA	4359.5	29.66915151	11.19298314	7.669015072	0.018663975	229.2979091	751368.93	188823.53	NA	ESE	9.1	1113.6	NA	5.78
1574	506810	891.22	46.9633885	8.739950854	6.881221525	0.233661397	211.1082546	3335.58	3.708628454	6.739463901	7.839184137	0	122.9498349	4226.8	12.82888663	7.161266206	7.407318278	0.049267462	141.5380215	613390.17	127887.53	NA	W	9.4	670.8	NA	4.01
1575	506811	1105.325	64.1892483	8.481231764	7.501845433	0.182981006	272.1091783	2186.293182	14.32688906	8.253765246	7.658680576	0	173.1603701	3291.618182	31.07066346	8.330148476	7.59947536	0.061445	206.3873683	610885.4	127213.07	NA	ENE	9.6	673.2	NA	3.8
1576	506812	912.5153846	82.22905688	11.3961341	6.477814347	0.366582701	264.3235618	1270.384615	20.50988828	8.338964578	7.590320601	0.079296785	177.6302858	2182.9	46.31028723	9.616949929	6.812285577	0.199390613	213.8705845	610831.77	127161.37	NA	SW	9.8	671.7	NA	3.25
1584	506859	2444.4	12.55933133	2.328673703	4.489699515	2.008595095	34.04257363	974.9888889	1.435114816	1.454985242	4.679730841	1.585684053	8.537200819	3419.388889	9.387423175	2.079554176	4.535963886	1.888008177	26.77008843	696350	123730	NA		11.4	1856.3	NA	3.29
1585	506860	1659.85	89.90844459	8.157389222	3.887119887	34.51311645	61.24874131	2522.995455	27.80491788	3.885411731	4.547240506	10.90575579	13.20527113	4182.845455	52.44903632	5.580631388	4.163871775	20.27370352	32.27003335	700760	114700	NA	N	12	1837.5	NA	4.28
1586	506855	1696.404762	115.932307	11.5023467	3.766717372	54.87074949	68.57467707	3276.415238	82.55656824	7.921203938	4.242062476	32.83336442	35.51466016	4972.82	93.94221303	9.142858378	4.01724624	40.3510958	46.79260107	709935	116970	NA	SW	7.4	2018.3	NA	5.4
1587	506858	681.6666667	71.71388117	5.38202934	3.933086765	27.36109606	53.36757065	1062.133333	10.31871689	2.051931647	4.51476156	6.650239797	8.098526933	1743.8	34.31862341	3.353695951	4.192329884	14.74629459	25.79459193	733990	128025	NA	SE	10.7	1565.2	NA	5.88
1588	506857	2118.175676	36.964903	5.908797729	4.352727769	22.30000979	36.19255296	5358.864324	13.53441099	5.408194279	4.462898991	18.33755217	21.35446294	7477.04	20.17205078	5.550010566	4.428751083	19.46007944	25.55795541	714900	92050	NA	E	12	1645.4	NA	4.54
1589	506856	1479.6	80.54956813	7.464862125	3.868939273	40.43207352	54.60992936	3480.7	34.84730773	5.183524866	4.273471078	17.95434281	21.03533598	4960.3	48.47976231	5.864021329	4.10946412	24.65918937	31.05024805	716940	100100	NA	SW	10.3	1731.4	NA	5.05
1590	506840	3427.5	22.41811685	35.91653392	3.934870393	34.52984197	115.6499265	6037.7	6.037504099	52.70569753	4.689060464	7.479026166	211.2614681	9465.2	11.96918544	46.62607341	4.258670402	17.27455834	176.6390028	661850	192125	NA	NW	9	1357.9	NA	6.03
1599	506835	2613.8	17.23287111	21.15300329	5.322906096	0.256394123	102.6169531	10082.66667	3.074293044	30.20266679	6.273180903	0	169.6286671	12696.46667	5.989095431	28.33962795	5.853209266	0.052783422	155.8330795	503062	135900	NA	NNW	10.2	1041	NA	4.08
1600	506836	1286.925	33.50247907	18.98801989	7.132628766	0	208.8706626	1386.941667	5.909170267	5.474124122	7.670151418	0	134.6975378	2673.866667	19.18975728	11.97832664	7.332084464	0	170.3968678	506930	144040	NA	SSE	9.4	1116	NA	4.68
1601	506837	2416.4	29.30747889	15.29458699	3.693431595	35.30626923	96.44329683	5975.7	5.974644644	23.19406597	5.2304107	0.379995303	103.0407698	8392.1	12.69304179	20.91951002	4.204011866	10.43657808	101.1411102	515005	148271	NA	SSE	8.7	1279.6	NA	6.06
1602	506838	2464.5	28.41571333	14.0082958	4.008430739	26.32525222	44.57048995	4326	7.203707235	18.59115118	3.96912138	29.00691333	74.2481763	6790.5	14.90225506	16.92787939	3.982980243	28.03364865	63.47714942	525985	172030	NA		8	1348.4	NA	4.77
1603	506839	3353.625	16.6071145	20.42300347	4.452836811	5.178174399	65.66508623	10690.575	4.430803406	28.20450911	5.380340194	0.617610102	140.096857	14044.2	7.338393821	26.34635757	4.935983409	1.706630654	122.3232389	572003	162995	NA	SW	8.1	1346.4	NA	6.82
1604	506841	2023.8	43.80571746	44.02339164	5.084030483	0.601229529	203.4619299	2995.1	13.61020433	17.76854195	7.589437272	0	244.6952641	5018.9	25.78611528	28.35543645	5.476468717	0.242437251	228.0685089	557050	128185	NA	SE	6.8	1555.3	NA	5.76
1605	506842	1433.9	72.71620476	18.71776623	6.994564888	0.140652863	276.7020337	6614.1	1.816140064	2.367596498	7.869123381	0	110.244517	8048	14.44829747	5.280681536	7.535364026	0.025059908	139.9020012	561215	128175	NA		10	1027.5	NA	6.63
1606	506843	1398.717391	29.90204801	15.66610513	3.69490494	89.13659804	133.6820161	3094.482609	17.80173324	17.44989329	3.561166034	84.07615818	104.6207478	4493.2	21.56851876	16.89460629	3.598563462	85.65145535	113.6674186	565055	104115	NA	SSE	6.1	1231.2	NA	4.34
1607	506844	866.3521739	29.99018614	11.0435178	4.566078072	3.511604497	63.68448499	2180.807826	7.716620026	9.046329581	4.881868024	0.960613047	52.67822788	3047.16	14.04932078	9.614159414	4.766599676	1.685897242	55.80746782	573080	103990	NA	SSE	7.9	1090.3	NA	3.67
1608	506845	2220.54	37.69119809	25.81633522	7.227852298	0	196.3238574	7102.54	8.459733405	24.52917041	7.643315163	0	151.5178787	9323.08	15.42198586	24.83574302	7.502875934	0	162.1896168	596870	123850	NA	SE	8.2	788.3	NA	5.98
1609	506846	1332.1	35.37027175	16.54925681	3.909272351	35.92665261	48.71692041	1504.2	21.22727164	13.62726366	4.076120007	30.12125369	35.97245473	2836.3	27.86968974	14.99961041	3.989762132	32.84782419	41.9580355	567070	113850	NA	E	8.4	1029.9	NA	4.97
1610	506847	1444.3	118.6960503	17.62154331	7.385208976	0.040885453	397.0844863	1992.066667	9.192550785	10.74028814	7.576718478	0	169.040749	3436.366667	55.21671518	13.63246986	7.485778869	0.017184098	264.887206	610890	129850	NA	SSW	8.7	761.5	NA	3.03
1611	506848	1477.756522	43.52522978	13.54823351	7.595785522	0	173.2729605	5433.743478	8.423636487	13.41770362	7.703185556	0	144.640944	6911.5	15.92875237	13.44561239	7.677885037	0	150.7627915	616180	129075	NA	SSE	9.7	662.6	NA	3.1
1612	506849	2022.677778	24.44091485	7.196592251	5.269402418	0.606192708	75.71615908	7250.722222	12.77261241	7.127859294	7.114525315	0	145.6323484	9273.4	15.31765695	7.142851058	5.90902635	0.132220385	130.3825024	633710	123230	NA	ENE	8.3	636.2	NA	3.59
1613	506850	1068.386207	42.49132511	13.57590565	5.700181453	0.28425758	145.99708	170.9137931	27.72	13.75	5.59	0.2902	106.2905	1239.3	40.45418865	13.59991527	5.683220284	0.285077108	140.5210837	621765	129305	NA	SSE	9.6	665.4	NA	4.56
1614	506851	488.35	39.35408058	10.87945121	6.697898679	0	147.1059949	792.65	6.648529931	8.176944427	7.393417644	0	156.2228326	1281	19.11672326	9.207209212	6.993775803	0	152.7472606	634780	126440	NA	W	8	670.8	NA	3.55
1615	506852	1614.475	40.75118127	13.85778504	7.243329226	0.037482166	220.3842315	3478.191667	11.98157049	10.35573346	7.606040847	0	171.233081	5092.666667	21.10210014	11.46595235	7.455659318	0.01188258	186.8149576	634445	125745	NA	NNW	8.6	635.6	NA	3.84
1616	506853	1867.2	24.8073645	9.676202335	5.468289908	0.316951055	86.48843057	522.5	15.295	8.1	5.34	0.4659	69.1486	2389.7	22.72751747	9.331570908	5.436824697	0.349518249	82.69713397	621115	127795	NA	NW	8.9	662.5	NA	5.14
1617	506854	2344.5	22.53821113	13.61431222	4.782261612	0	126.2052907	NA	NA	NA	NA	NA	NA	2344.5	22.53821113	13.61431222	4.782261612	0	126.2052907	594755	122150	NA	NW	8.6	725.8	NA	4.25
1618	506861	2283.3	16.30679762	25.13777646	4.189939564	11.77232633	56.47274469	5370.24	4.029492015	21.39153781	4.545464322	2.95916641	36.34392017	7653.54	7.692211735	22.50916269	4.406183153	5.588418762	42.34900344	763756	205264	NA	SW	8.7	1226.5	NA	5.25
1619	506862	1167.971429	64.48511834	21.85612478	7.08397177	0.170715606	295.8817317	3881.428571	22.58300755	14.8281025	7.679103419	0	185.3737583	5049.4	32.27534093	16.45374698	7.453979373	0.039488048	210.9352419	752462	187929	NA	ENE	9	1115	NA	5.95
1620	506863	1015.694595	61.0188478	15.09367521	7.474089036	0.122806039	279.0904792	3896.605405	45.53927962	19.04797457	7.493786494	0	253.0100967	4912.3	48.73992163	18.23036154	7.489639825	0.025392063	258.4026223	747115	188120	NA	SSE	8.6	1073.5	NA	4.04
1621	506864	2608.285714	12.99186535	6.989912093	7.528947591	0	136.2528857	3475.014286	7.090119547	5.073497745	7.60726727	0	125.8633371	6083.3	9.620561784	5.895182713	7.571944565	0	130.317977	758110	207920	NA		9.3	1100.1	NA	5.02
1622	506865	1281.933333	25.00086588	14.2163295	4.504978359	5.379316735	66.2466534	2745.966667	9.288282875	10.55104699	4.51992302	3.18505766	32.9621744	4027.9	14.28902368	11.71757243	4.515110659	3.883410114	43.55540738	730010	183000	NA	SW	7.2	1168.6	NA	4.96
1657	510270	1401.5	57.28217802	55.73193007	5.833283076	0.077994328	416.0430134	1885.3	12.28101124	27.49130908	7.527548409	0.067998287	246.3420152	3286.8	31.46962486	39.53318273	6.191809483	0.072260624	318.7029586	682409.512	281859.034	NA	S	9.1	948.7	NA	4.38
1658	510271	1727.5	30.19524631	19.44470333	7.038480742	0	212.914699	3101.485714	8.719917229	7.436131071	7.547575579	0	190.0364427	4828.985714	16.40240651	11.73202462	7.292915409	0	198.220809	582512.18	117588.611	NA	S	8.6	814.6	NA	4.5
1659	510273	2044.5	43.46392321	15.81815114	7.437285909	0.151742167	236.5219399	3503	15.27351499	15.03327148	7.735622669	0.142454319	166.3790516	5547.5	25.66293177	15.32253447	7.600812263	0.145877303	192.2298196	579010.758	113257.819	NA	SE	9.4	828.2	NA	4.09
1660	510274	1459.88	61.70673083	13.31564649	7.216310498	0.73046717	339.0484324	2994.795	11.04626982	15.70215332	7.690805921	0.17437097	164.399912	4454.675	27.64864683	14.92005056	7.473450747	0.356614056	221.6354863	610806.31	127224.27	NA	S	9.8	671.7	NA	2.94
