# Supplementary material for: Is the content and potential preservation of soil organic carbon reflected by cation exchange capacity? A case study in Swiss forest soils
Source: Copernicus journal article supplement (doi:10.5194/bg-2019-33), 2019-02-18

Supporting Information for

**Is the content and potential preservation of soil organic carbon reflected by cation exchange capacity? A case study in Swiss forest soils**

Emily F. Solly<sup>1</sup>, Valentino Weber<sup>1</sup>, Stephan Zimmermann<sup>2</sup>, Lorenz Walthert<sup>2</sup>, Frank Hagedorn<sup>2</sup>, Michael W. I. Schmidt<sup>1</sup>

<sup>1</sup> University of Zurich, Department of Geography, Winterthurerstrasse 190, 8057 Zürich, Switzerland.

<sup>2</sup> Swiss Federal Institute for Forest, Snow and Landscape Research WSL, Zürcherstrasse 111, 8903 Birmensdorf, Switzerland.

**Contents of this file:**

**Figures S1-S4**

**Fig S1:** Median values of effective cation exchange capacity (brown squares), percentage of clay (blue diamonds), exchangeable Al (orange triangles) and SOC content (grey circles), for complete mineral soil profiles (0-120 cm depth).

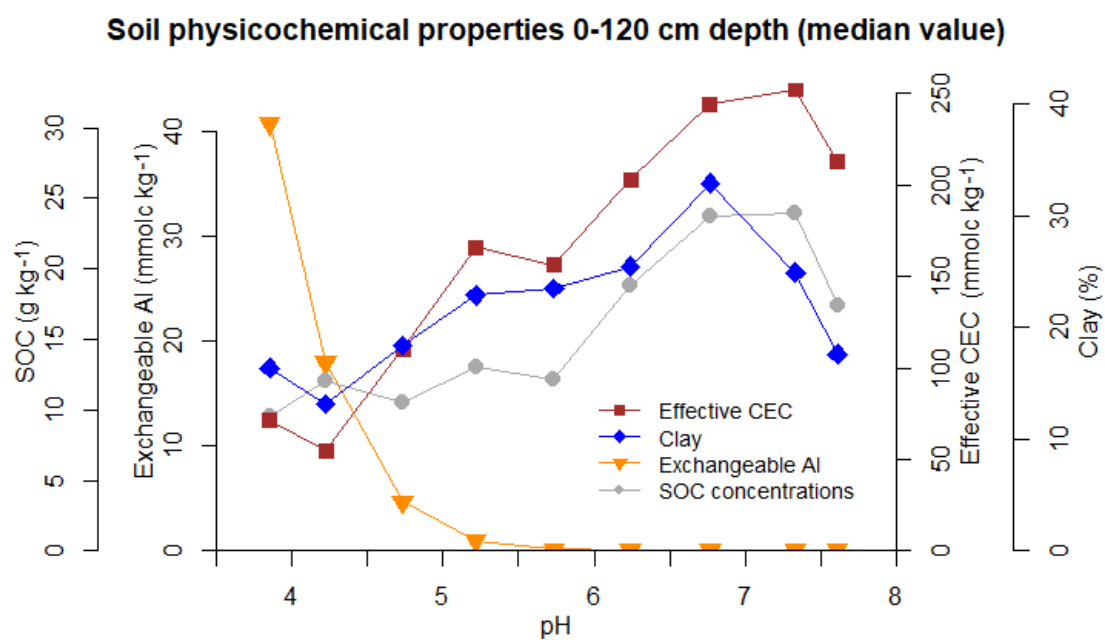

**Fig. S2:** Spatial distribution of pH in the Swiss forest sites analyzed in this study, for (a) complete mineral soil profiles (0-120 cm depth), (b) topsoils (0-30 cm depth), (c) subsoils (30-120 cm depth). Maps were built using R packages ('sp', 'lattice', 'RColorBrewer', 'proj4', 'rworldmap', 'raster', 'rgdal').

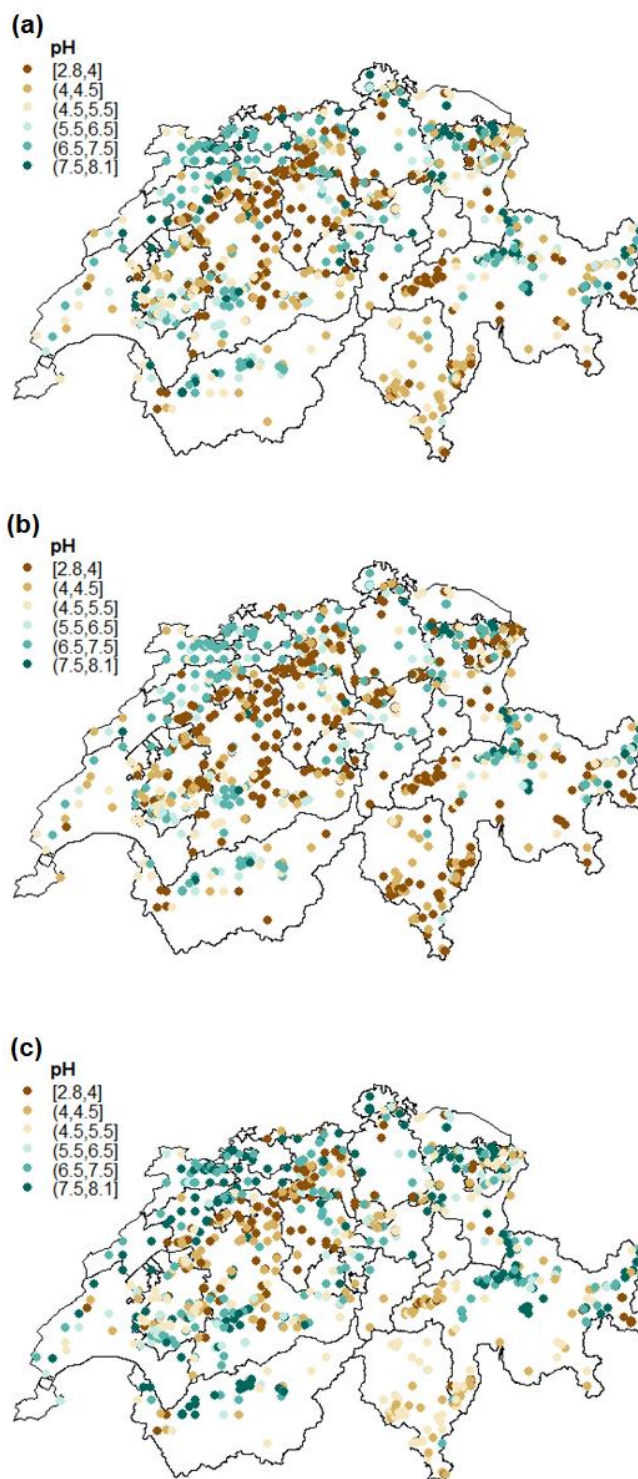

**Fig. S3** Spatial distribution of mean annual precipitation MAP in the Swiss forest sites analyzed in this study. Maps were built using R packages ('sp', 'lattice', 'RColorBrewer', 'proj4', 'rworldmap', 'raster', 'rgdal').

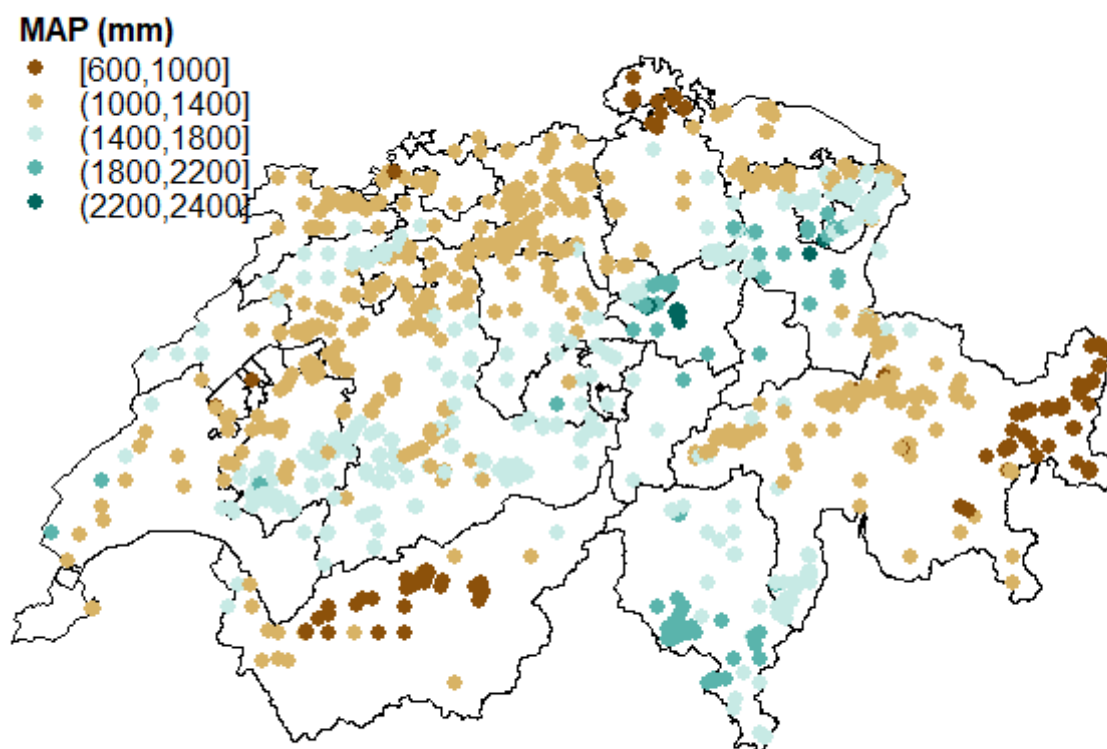

**Fig. S4:** Ranges of (a) pH at 0-120 cm depth and (b) CEC, effective cation exchange capacity at 0-120 cm depth for different soil types classified according to the World Reference Base Classification (IUSS Working Group WRB 2007). In the box-plots, the bar represents the median, the box denotes the interquartile range, and the whiskers show 1.5 times the interquartile range of the data.

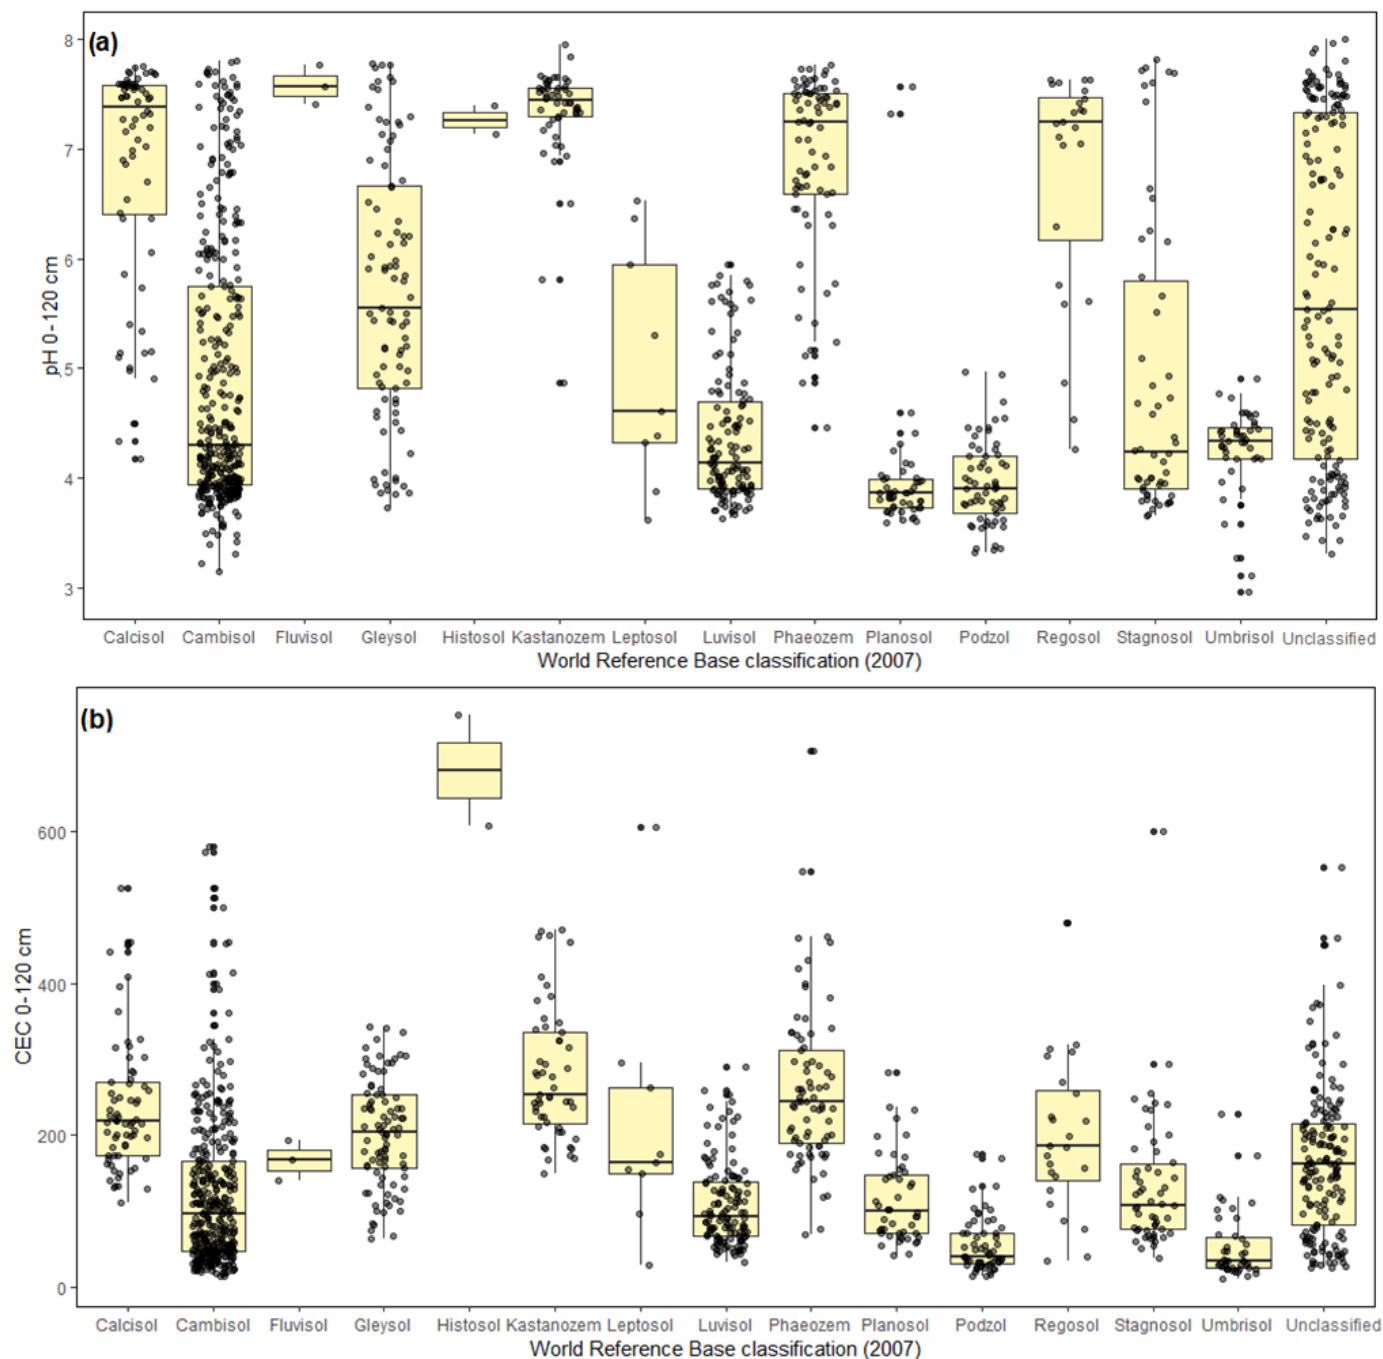

Supplement: Supplementary file 1 [file bg-2019-33-supplement.zip › Supplement_Solly_etal/Supplement_Solly_etal.pdf]
